# Supplementary material
Source: publisher figshare collection journal article supplement (https://plos.figshare.com/ndownloader/files/38504792)
Supplement: Supplementary file 1 [file 38504792]

Publication date,Publication Year,DOI,Major Mesh Terms,Country,DA,Data_Section Text:Generated,Data_Generated,Data_Shared,Data_location,URL,Accessions,Repositories,Code_Section Text:Generated,Code_Generated,Code_Shared,Code_location,Preprint_Match,Preprint_DOI,Preprint_Date,Preprint_URL,Preprint_Server
31/1/2022,2022,10.3390/ijms23031674,"Lipopolysaccharides, Mesenchymal Stem Cells, Placenta",Missing,"data availability statement the raw data supporting the conclusions of this article will be made available by the authors, without undue reservation.",Method,Yes,No,N/A,N/A,N/A,N/A,N/A,No,No,N/A,No,N/A,N/A,N/A,N/A
29/4/2020,2020,10.7554/eLife.52985,"""3 Untranslated Regions"", Thymocytes, Thymus Gland",France,data availability all rnaseq and microarray data are deposited in the ncbi gene expression omnibus database (geo). the following datasets were generated: giraud m guyon c 2020 wt and aire-ko mouse mechi rnaseq profiling ncbi gene expression omnibus gse140683 giraud m jmari n padonou f 2020 rnaseq profiling of aire and ctr-transfected hek293 cells ncbi gene expression omnibus gse140738 giraud m guyon c 2020 stability of aire-upregulated and aire-neutral transcripts in medullary thymic epithelial cells ncbi gene expression omnibus gse140815 giraud m guyon c jmari n 2020 clp1 knockdown lentigenic mouse generation ncbi gene expression omnibus gse140878 giraud m jmari n 2020 rnaseq profiling of ctr and clp1 knockdown hek293 cells ncbi gene expression omnibus gse140993 giraud m jmari n 2020 rnaseq profiling of ctr and clp1 knockdown hek293 cells ncbi gene expression omnibus gse141118 the following previously published datasets were used: gruber ar 2012 par-clip cstf-64 ncbi gene expression omnibus gsm917676 abramson j giraud m 2016 aire-ko mechi rnaseq profiling ncbi gene expression omnibus gse87133 abramson j giraud m 2015 sirt1 is essential for aire-mediated induction of central immunological tolerance ncbi gene expression omnibus gse68190,Method,Yes,Yes,Online,N/A,"GSE68190, GSE140738, GSE141118, GSE140993, GSE140815, GSM917676, GSE140878, GSE87133, GSE140683",Gene Expression Omnibus,Method|Fulltext,Yes,No,N/A,Yes,10.1101/837880,2019/11/12,http://dx.doi.org/10.1101/837880,bioRxiv
1/4/2021,2021,10.1038/s41467-021-22328-4,"COVID-19, Data Curation, Expert Systems, Machine Learning",Missing,"code availability trove is written in python v3.6, spacy 2.3.4 was used for nlp preprocessing, and snorkel v0.9.5 was used for training the label model. biobert-base v1.1, transformers v2.8 63 , and pytorch v1.1.0 were used to train all discriminative models. trove is open-source software and publicly available at  https://github.com/som-shahlab/trove ;10.5281/zenodo.4497214 64 .",Method,Yes,Yes,Online,"10.5281/zenodo.4497214, https://github.com/shangjingbo1226/autoner/blob/master/data/bc5cdr/dict_core.txt, https://biocreative.bioinformatics.udel.edu/tasks/biocreative-v/track-3-cdr/, https://healthnlp.hms.harvard.edu/center/pages/data-sets.html, ftp.ebi.ac.uk/pub/databases/chebi/, https://sbmi.uth.edu/ccb/resources/abbreviation.htm, http://arrowsmith.psych.uic.edu/arrowsmith_uic/adam.html, https://www.nlm.nih.gov/research/umls/index.html, https://physionet.org/content/shareclefehealth2014task2/1.0/, https://portal.dbmi.hms.harvard.edu/projects/n2c2-nlp/, http://ctdbase.org, https://github.com/som-shahlab/trove, https://lsg3.nlm.nih.gov/lexsysgroup/summary/lexicon.html, https://bioportal.bioontology.org/ontologies/doid",N/A,"Github, PhysioNet, Zenodo",DA|Method,Yes,Yes,Online,Yes,10.48550/arxiv.2008.01972,N/A,https://arxiv.org/abs/2008.01972,arXiv
2/12/2020,2020,10.1186/s12873-020-00387-y,"Ambulances, Emergency Medical Services, Home Care Services",Missing,availability of data and materials the datasets used and/or analyzed during the current study are available from the corresponding author on reasonable request.,Method,Yes,No,N/A,N/A,N/A,N/A,N/A,No,No,N/A,No,N/A,N/A,N/A,N/A
14/10/2020,2020,10.1038/s41467-020-18763-4,"Carbon Cycle, Carbon Dioxide, Methane, Plants, Sea Level Rise",Missing,data accessibility data used in this work are available from the corresponding authors upon request and at the smithsonian institution figshare repository ( https://smithsonian.figshare.com ) under the 10.25573/serc.12855323.,Method,Yes,Yes,Online,"10.25573/serc.12855323, https://smithsonian.figshare.com",N/A,figshare,N/A,No,No,N/A,No,N/A,N/A,N/A,N/A
29/9/2020,2020,10.1186/s12915-020-00859-4,"Antimalarials, Azithromycin, Malaria, Plasmodium falciparum, Plasmodium knowlesi, Plasmodium vivax",Missing,"availability of data and materials all data generated or analysed during this study are included in this published article, its supplementary information files and publicly available repositories. the metabolomics spectrometry data and search results [ 92 ] supporting the conclusions of this article are available at the nih common fund’s national metabolomics data repository (nmdr) website, the metabolomics workbench,  https://www.metabolomicsworkbench.org  where it has been assigned project id (st001315). the data can be accessed directly via it’s project doi: (10.21228/m8cx0m). this work is supported by nih grant u2c-dk119886. supporting data values for other experiments are included in additional file  15  supporting data values. other datasets used and/or analysed during the current study are available from the corresponding author on request.",Method,Yes,Yes,Online,"https://www.metabolomicsworkbench.org, 10.21228/m8cx0m",N/A,N/A,N/A,No,No,N/A,No,N/A,N/A,N/A,N/A
01/04/2019,2019,10.1002/cam4.1845,"Diabetes Mellitus, Type 2, Leukemia, Myelogenous, Chronic, BCR-ABL Positive, Prostatic Neoplasms",Missing,N/A,Method,Yes,Yes,Online,https://disease-connect.org/,N/A,N/A,Method,Yes,No,N/A,No,N/A,N/A,N/A,N/A
17/12/2020,2020,10.1016/j.molcel.2020.11.004,"Frameshifting, Ribosomal, Genome, Viral, RNA, Viral, SARS-CoV-2, Virus Replication",Missing,"materials availability no unique materials were generated in this study.|data and code availability the accession number for the sequencing data reported in this paper is geo:  gse154662 . computer code has been deposited on github:  https://github.com/jlp-bioinf/sars-cov2-comrades . base-pairing prediction, structure prediction and clustering data are available for exploration as a web interface:  https://github.com/jlp-bioinf/sars-cov2-comrades-app . additional supplemental items are available from mendeley data at  https://dx.doi.org/10.17632/ghh6w67vmx.1 . additional data supporting the findings of this study are available from the corresponding authors upon request.|data s1. antisense probes for viral rna pull-downs, related to star methods|data s2. clustering of chimeric reads, related to star methods|data s3. covarying bases in sars-cov-2, related to star methods",Method,Yes,Yes,Supplementary Information|Online,"https://github.com/jlp-bioinf/sars-cov2-comrades, 10.17632/ghh6w67vmx.1, https://github.com/jlp-bioinf/sars-cov2-comrades-app, https://github.com/JLP-BioInf/SARS-CoV2-COMRADES-APP, https://dx.doi.org/10.17632/ghh6w67vmx.1",GSE154662,"Github, Mendeley Data ,  Gene Expression Omnibus",DA|Method|Fulltext,Yes,Yes,Online,Yes,10.1101/2020.07.19.211110,2020/07/21,http://dx.doi.org/10.1101/2020.07.19.211110,bioRxiv
24/6/2022,2022,10.1126/science.abh2841,"Electron Transport Complex I, Macrophages, Metformin, Mycobacterium tuberculosis, Reactive Oxygen Species, Tuberculosis, Tumor Necrosis Factor-alpha",Missing,data and materials availability all data are available in the main text or the  supplementary materials .,Method,Yes,No,N/A,N/A,N/A,N/A,N/A,No,No,N/A,Yes,10.1101/511436,2021/06/28,http://dx.doi.org/10.1101/511436,bioRxiv
15/6/2020,2020,10.1186/s12933-020-01061-0,"Blood Glucose, Fatty Acid-Binding Proteins",Missing,availability of data and materials the datasets analyzed during the current study are available from the corresponding author on reasonable request (furuhasi@sapmed.ac.jp).,Method,Yes,No,N/A,N/A,N/A,N/A,Method,Yes,No,N/A,No,N/A,N/A,N/A,N/A
19/11/2019,2019,10.3390/nu11112832,"Asians, Cultural Characteristics, Diet, Emotions, Food Preferences, Unconscious, Psychology, Whites",Missing,N/A,Method,Yes,No,N/A,N/A,N/A,N/A,Method,Yes,No,N/A,No,N/A,N/A,N/A,N/A
15/3/2022,2022,10.3390/nu14061232,"Epigenomics, RNA",Missing,data availability statement all data were reported in the manuscript and in the  supplementary materials .,Method,Yes,Yes,Online,"10.3390/nu14061232/s1, https://www.mdpi.com/article/10.3390/nu14061232/s1",N/A,N/A,Method,Yes,No,N/A,No,N/A,N/A,N/A,N/A
15/4/2022,2022,10.3390/ijms23084381,"Alzheimer Disease, Curcumin",Missing,data availability statement the data presented in this study are available on request from the corresponding author.,Method,Yes,Yes,Online,"https://www.mdpi.com/article/10.3390/ijms23084381/s1, 10.3390/ijms23084381/s1",N/A,N/A,N/A,No,No,N/A,No,N/A,N/A,N/A,N/A
13/7/2021,2021,10.1038/s41598-021-93527-8,"Caenorhabditis elegans, Intestines",Missing,N/A,Method,Yes,No,N/A,N/A,N/A,N/A,Method|Fulltext,Yes,No,N/A,No,N/A,N/A,N/A,N/A
10/2/2021,2021,10.3390/molecules26040937,"Carcinoma, Hepatocellular, Ferric Compounds, Liver Neoplasms, Magnetite Nanoparticles, Nanocomposites, Pyrimidines",Missing,data availability statement the data presented in this study are available on request from the corresponding author.,Method,Yes,No,N/A,N/A,N/A,N/A,N/A,No,No,N/A,No,N/A,N/A,N/A,N/A
12/8/2020,2020,10.1186/s12889-020-09316-x,"Intention, Marital Status, Vasectomy",Missing,availability of data and materials the datasets used and/or analysed during the current study available from the corresponding author on reasonable request.,Method,Yes,No,N/A,N/A,N/A,N/A,N/A,No,No,N/A,No,N/A,N/A,N/A,N/A
21/1/2019,2019,10.1038/s41467-018-08162-1,"Brain, Drug Tolerance, Pain, Receptors, Opioid, mu",Missing,data availability the authors declare that all data supporting the findings of this study are available within the paper and its supplementary information files. the source data underlying all figures are provided as a source data file. the data that support the findings of this study are available from the authors upon reasonable request.,Method,Yes,Yes,Online,N/A,N/A,N/A,N/A,No,No,N/A,No,N/A,N/A,N/A,N/A
20/6/2019,2019,10.2196/14184,"Blockchain, Health Information Exchange, Patient Preference",United States of America,N/A,Method,Yes,No,N/A,N/A,N/A,N/A,Method,Yes,No,N/A,Yes,10.2196/preprints.14184,2019/03/29,http://dx.doi.org/10.2196/preprints.14184,Journal of Medical Internet Research
19/11/2019,2020,10.1111/acel.13061,"Nucleosomes, Saccharomyces cerevisiae Proteins, Telomere-Binding Proteins, Transcription Factors",Missing,N/A,N/A,No,No,N/A,N/A,N/A,N/A,Fulltext,Yes,No,N/A,No,N/A,N/A,N/A,N/A
18/12/2019,2019,10.1186/s12896-019-0583-x,Olea,Missing,availability of data and materials the datasets used and/or analyzed during the current study are available from the corresponding author on reasonable request.,Method,Yes,Yes,Online,"http://rdp.cme.msu.edu, https://bmcbiotechnol.biomedcentral.com/articles/supplements/volume-19-supplement-2",N/A,N/A,N/A,No,No,N/A,Yes,10.1101/326090,2018/05/18,http://dx.doi.org/10.1101/326090,bioRxiv
12/3/2019,2019,10.1155/2019/4916546,"Glycated Hemoglobin A, Prediabetic State",Missing,data availability the data used to support the findings of this study have not been made available because the original data were personal results of annual health checkups. the participants in this study have never consented to disclose their results.,Method,Yes,No,N/A,N/A,N/A,N/A,N/A,No,No,N/A,No,N/A,N/A,N/A,N/A
21/10/2019,2019,10.1186/s12879-019-4507-0,"Antitubercular Agents, HIV, Lymph Nodes",Missing,availability of data and materials all data used in analysis of this manuscript is freely available by contacting the corresponding author.,Method,Yes,No,N/A,N/A,N/A,N/A,N/A,No,No,N/A,No,N/A,N/A,N/A,N/A
28/10/2019,2019,10.1186/s12879-019-4423-3,"Acinetobacter Infections, Acinetobacter baumannii, Anti-Bacterial Agents, Carbapenems, Drug Resistance, Bacterial",Missing,availability of data and materials all data generated or analyzed in this study are available on request to the corresponding author.,Method,Yes,Yes,Online,N/A,N/A,N/A,N/A,No,No,N/A,No,N/A,N/A,N/A,N/A
19/3/2021,2021,10.1038/s41467-021-21955-1,"Germ Cells, Plasmodium falciparum",Missing,source data   source data|data availability all data generated or analyzed during this study are included in this published article (and its supplementary information files). sequences of lmiv230-01 and lmiv230-02 are available in supplementary table  7 . atomic coordinates and structural factors of pfs230d1–lmiv230-01 scfv were deposited to the protein data bank under accession code 7jum.  source data  are provided with this paper.,Method,Yes,Yes,Online,N/A,N/A,N/A,DA|Method,Yes,Yes,Online,Yes,10.1101/2020.09.25.313478,2020/09/26,http://dx.doi.org/10.1101/2020.09.25.313478,bioRxiv
21/4/2020,2020,10.1186/s12879-020-05011-9,"AIDS-Related Opportunistic Infections, Latent Tuberculosis",Missing,"availability of data and materials the data that support the findings of this study are available from the kenyatta national hospital administration, but restrictions apply to the availability of these data, which were used under license for the current study, and so are not publicly available. data are however available from the authors upon reasonable request and with permission of the kenyatta national hospital administration.",Method,Yes,Yes,Online,N/A,N/A,N/A,N/A,No,No,N/A,No,N/A,N/A,N/A,N/A
25/12/2021,2021,10.3390/ijerph19010213,"Abortion, Induced, Universities",Missing,data availability statement data supporting reported results are available on request from the study team.,Method,Yes,No,N/A,N/A,N/A,N/A,N/A,No,No,N/A,No,N/A,N/A,N/A,N/A
13/8/2020,2020,10.3390/molecules25163692,"Crown Ethers, Platinum, Resins, Synthetic, Water Pollutants, Chemical, Water Purification",Missing,N/A,Method,Yes,No,N/A,N/A,N/A,N/A,N/A,No,No,N/A,No,N/A,N/A,N/A,N/A
07/06/2021,2021,10.3390/ijerph18116158,"Depression, Quality of Life",Missing,"data availability statement the data used in this study is available from the korea center for disease control and prevention, following webpage:  https://knhanes.cdc.go.kr/  (accessed on 7 june 2021).",Method,Yes,Yes,Online,https://knhanes.cdc.go.kr/,N/A,N/A,Method|Fulltext,Yes,No,N/A,No,N/A,N/A,N/A,N/A
29/9/2020,2021,10.1007/s12550-020-00410-y,"Cumulus Cells, Embryonic Development, Ochratoxins, Oocytes",Missing,N/A,Method,Yes,Yes,Online,N/A,N/A,N/A,N/A,No,No,N/A,No,N/A,N/A,N/A,N/A
3/5/2022,2022,10.1038/s41598-022-11176-x,"Acaricides, Oils, Volatile, Scabies",Missing,data availability the datasets supporting the conclusions of this article are included within the article. raw data are available from the corresponding author on reasonable request.,Method,Yes,Yes,Online,N/A,N/A,N/A,Method,Yes,No,N/A,No,N/A,N/A,N/A,N/A
19/3/2019,2019,10.1042/BSR20181809,"Forkhead Transcription Factors, Polymorphism, Single Nucleotide",Missing,N/A,Method,Yes,No,N/A,N/A,N/A,N/A,N/A,No,No,N/A,Yes,10.21203/rs.3.rs-63455/v1,2020/09/17,http://dx.doi.org/10.21203/rs.3.rs-63455/v1,Research Square
6/2021,2021,10.1016/j.coi.2021.03.019,"Antigen Presentation, Autoimmune Diseases",Missing,N/A,N/A,No,No,N/A,"clinicaltrials.gov/ct2/show/NCT03272269, acrabstracts.org/abstract/a-phase-i-randomized-double-blind-placebo-controlled-single-center-single-dose-escalation-to-investigate-the-safety-tolerability-and-pharmacodynamics-of-subcutaneously-administered-den-181-in-a/.bhttps://anokion.com/wp-content/uploads/2019/09/ECTRIMS_Poster_9.13.19.pdf.cMULTIPLE, http://creativecommons.org/licenses/by/4.0/, selectabio.com/immtor/gouttherapy/phase2results.eVolume",N/A,ClinicalTrials.gov,N/A,No,No,N/A,No,N/A,N/A,N/A,N/A
30/3/2020,2020,10.1038/s41598-020-62486-x,"Depression, Emotional Adjustment, Membrane Proteins, Personality, Polymorphism, Single Nucleotide",Missing,N/A,Method,Yes,No,N/A,N/A,N/A,N/A,Method|Fulltext,Yes,No,N/A,No,N/A,N/A,N/A,N/A
21/9/2021,2021,10.3390/ijerph18189918,"Mercury, Spheniscidae",Missing,data availability statement data available on request due to restrictions privacy. the data presented in this study are available on request from the corresponding author. the data are not publicly available due to restrictions privacy.,Method,Yes,Yes,Online,http://www.mercuryconvention.org/,N/A,N/A,N/A,No,No,N/A,No,N/A,N/A,N/A,N/A
13/6/2019,2019,10.3390/ijerph16122096,"Cadmium, Environmental Pollutants, Lead",Missing,"2.1. design and data collection this cross-sectional study used data from the korea national health and nutrition examination survey (knhanes) of 2008–2017, which included knhanes iv (2007–2009), knhanes v (2010–2012), knhanes vi (2013–2015), and knhanes vii (2016–2017). these surveys were conducted annually by use of a rolling sample design that employs a complex, stratified, multistage probability cluster analysis of a representative sample of the non-institutionalized civilian population of south korea. thus, the knhanes is a large representative population study with rigorous quality controls. these surveys were performed by the korean centers for disease control and prevention and the korean ministry of health and welfare, and have three components: a health interview, a health examination, and a nutrition survey.  after explanation of the survey, all participants were provided written informed consent prior to participation. this survey was approved by the institutional review board of the korean centers for disease control and prevention (approval nos. 2007-02con-04-p, 2008-04exp-01-c, 2009-01con-03-2c, 2010-02con-21-c, 2011-02con-06-c, 2012-01exp-01-2c, 2013-07con-03-4c, 2013-12exp-03-5c).  the analysis was restricted to 16,873 adults (≥19 years old) who completed the health examination survey, which included measurement of blood metals, and the nutrition survey. kweon provided details on the survey design [ 24 ]. briefly, data on age, sex, smoking history, alcohol intake, region of residence, and occupation were collected during the health interview. smoking status (current smoker, past smoker, and never-smoker) was based on self-reported cigarette use. never-smokers were those who had smoked fewer than 100 cigarettes in their lifetimes; subjects who smoked 100 or more cigarettes were classified as past or current smokers based on current smoking habits. alcohol consumption was based on self-reported drinking behavior during the month prior to the interview, and included average frequency of drinking (days per month) and amount ingested (in ml) on each occasion. these data were converted into amount of pure alcohol (g) consumed per day. subjects were then categorized according to average daily alcohol consumption: nondrinker, light drinker (1–15 g), moderate drinker (16–30 g), or heavy drinker (>30 g). area of residence was categorized as urban (within an administrative division of a city) or rural (outside the administrative division of a city). regular walking was defined as indoor or outdoor walking for at least 30 min at a time at least 3 times per week. regular exercise was defined as participating in moderate exercise (slow swimming, doubles tennis, volleyball, or occupational or recreational activity involving the carrying of light objects) on a regular basis for at least 30 min at a time at least 5 times per week, or participating in vigorous exercise (running, climbing, fast cycling, fast swimming, football, basketball, rope jumping, squash, singles tennis, or occupational or recreational activity involving the carrying of heavy objects) for at least 20 min at a time at least 3 times per week. study subjects were classified as waged employees or others (self-employed, employers, or unemployed), and waged employees were further categorized as manual or non-manual workers.",Method,Yes,No,N/A,N/A,N/A,N/A,Method,Yes,No,N/A,Yes,10.20944/preprints201803.0133.v1,2018/03/19,http://dx.doi.org/10.20944/preprints201803.0133.v1,Preprints.org
12/2/2020,2020,10.1186/s12866-020-1717-y,"Mycetoma, RNA, Ribosomal, 16S, Sequence Analysis, DNA, Streptomyces",Missing,availability of data and materials the datasets used and/or analyzed during the current study are available from the corresponding author on reasonable request. the partial bacterial 16s rrna gene sequences are deposited at ncbi under the accession numbers mf353938-mf353991 and mf356310-mf356365. source organisms and the degree of homology to publicly available bacterial 16 s rrna gene sequences are given in additional file  4 .,Method,Yes,Yes,Online,N/A,N/A,N/A,N/A,No,No,N/A,Yes,10.21203/rs.2.16084/v1,2019/10/16,http://dx.doi.org/10.21203/rs.2.16084/v1,Research Square
29/7/2020,2020,10.1155/2020/5802435,"Cell Hypoxia, Macrophages",Missing,data availability all datasets are publically available upon request from the corresponding author.,Method,Yes,No,N/A,N/A,N/A,N/A,N/A,No,No,N/A,No,N/A,N/A,N/A,N/A
6/9/2019,2019,10.1038/s41398-019-0557-8,"Auditory Perception, Brain, Cognition, Schizophrenia, Schizophrenic Psychology, Social Perception",Missing,N/A,Method,Yes,No,N/A,N/A,N/A,N/A,Method,Yes,No,N/A,No,N/A,N/A,N/A,N/A
23/4/2021,2021,10.1186/s12940-021-00733-y,"Hot Temperature, Premature Birth",Missing,"availability of data and materials the datasets supporting the conclusions of this article are available in the national center for health statistics (nchs,  https://www.cdc.gov/nchs/data_access/vitalstatsonline.htm ) and daymet ( https://daymet.ornl.gov/overview ).",Method,Yes,Yes,Online,"https://daymet.ornl.gov/overview, https://www.cdc.gov/nchs/data_access/vitalstatsonline.htm",N/A,"Centre for Disease Control (CDC), daymet.ornl.gov",Method|Supplementary,Yes,No,N/A,No,N/A,N/A,N/A,N/A
23/11/2020,2020,10.1186/s40644-020-00361-8,"Adenocarcinoma of Lung, Brain Stem, Lung Neoplasms, Meningeal Neoplasms",Missing,availability of data and materials no additional data.,Method,Yes,No,N/A,N/A,N/A,N/A,N/A,No,No,N/A,No,N/A,N/A,N/A,N/A
25/5/2021,2021,10.3390/cells10061315,"Image-Guided Biopsy, Magnetic Resonance Imaging, MicroRNAs, Prostatic Neoplasms",Missing,data availability statement data is contained within this article and the  supplementary materials . further data can be obtained from the corresponding author upon reasonable request.,Method,Yes,Yes,Online,"https://www.mdpi.com/article/10.3390/cells10061315/s1, 10.3390/cells10061315/s1",N/A,N/A,Method,Yes,No,N/A,No,N/A,N/A,N/A,N/A
1/11/2021,2021,10.1099/mgen.0.000660,"Campylobacter Infections, Campylobacter jejuni, Guillain-Barre Syndrome",Missing,N/A,Method,Yes,Yes,Online,"10.6084/m9.figshare.14877510.v1.Impact, https://toolkit.tuebingen.mpg.de/tools/hhpred",N/A,figshare,Method|Fulltext,Yes,No,N/A,No,N/A,N/A,N/A,N/A
05/07/2021,2021,10.3390/v13071303,"Arachis, Disease Resistance, Gene Expression, Plant Diseases",Missing,"data availability statement the raw read sequences were submitted to the ncbi sra ( https://www.ncbi.nlm.nih.gov/sra/?term=  accessed on 1 february 2021). the sample submission designations are as follows: healthy-sunoleic (srr7196286), tswv-infected-sunoleic (srr7196285), healthy-tifguard (srr7196284), and tswv-infected-tifguard (srr7196283). the complete assembly for the transcriptome was submitted to the ncbi transcriptome shotgun assembly (tsa) database.",Method,Yes,Yes,Online,"https://www.ncbi.nlm.nih.gov/sra/?term=, 10.3390/v13071303/s1, https://www.mdpi.com/article/10.3390/v13071303/s1","SRR7196283, SRR7196286, SRR7196284, SRR7196285",NCBI Sequence Read Archive,Method|Supplementary|Fulltext,Yes,No,N/A,No,N/A,N/A,N/A,N/A
23/5/2019,2019,10.1186/s12937-019-0454-2,"Diet, Diet Surveys, Nutrition Assessment",Missing,"availability of data and materials the datasets generated and/or analyzed during the current study are not publicly available due to the confidentiality regulations of our agency, but are available from the corresponding author upon request.",Method,Yes,Yes,Online,N/A,N/A,N/A,Method,Yes,No,N/A,No,N/A,N/A,N/A,N/A
27/3/2022,2022,10.1186/s12903-022-02133-1,"COVID-19, Oral Medicine, Telemedicine",Missing,availability of data and materials the datasets analyzed during the current study are not publicly available due to include the patient’s information’s but are available from the corresponding author on reasonable request.,Method,Yes,Yes,Online,www.google.com,N/A,N/A,DA,Yes,Yes,Online,Yes,10.21203/rs.3.rs-1033087/v1,2021/11/09,http://dx.doi.org/10.21203/rs.3.rs-1033087/v1,Research Square
3/3/2022,2022,10.1038/s41467-022-28746-2,"Autism Spectrum Disorder, Gastrointestinal Microbiome, Microbiota",Missing,source data   source data,Method,Yes,Yes,Online,N/A,N/A,N/A,DA|Method|Fulltext,Yes,Yes,Online,No,N/A,N/A,N/A,N/A
20/10/2021,2021,10.3390/nu13113691,"Guideline Adherence, Nutrition Policy, Obesity",Missing,N/A,Method,Yes,Yes,Online,"10.3390/nu13113691/s1, https://www.mdpi.com/article/10.3390/nu13113691/s1",N/A,N/A,N/A,No,No,N/A,No,N/A,N/A,N/A,N/A
24/2/2020,2020,10.18632/aging.102860,"Circadian Rhythm, Habits, Patient Acceptance of Health Care, Sleep",Missing,"data we obtained data from the dftj cohort study, a prospective cohort study in hubei province, china. the details of this cohort have been described in a previous report [ 31 ]. briefly, 27,009 retired employees from the dongfeng motor corporation (dmc) were recruited and completed baseline questionnaires from september 2008 to june 2010. all participants were covered by the health-care service system of dmc and urban employee-based basic medical insurance, which provides them with fair access to health care services and financial protection. in-person interviews were conducted with the study participants. the participants repeated the questionnaire interviews at follow-up investigations every 5 years. the content of this questionnaire included details about sociodemographic characteristics, lifestyle, occupational history, environmental exposure, and medical history. the first follow-up investigation was completed in 2013. in the present study, we analyzed data from all retired employees who participated in the 2013 investigation. we excluded 1694 (4.42%) individuals because of incomplete information on sleep and health care use. the final valid sample comprised of 36,601 (95.58%) responses. the study was approved by the medical ethics committee of the school of public health, tongji medical college, huazhong university of science and technology and dmc affiliated dongfeng general hospital, and was subsequently carried out in accordance with the approved guidelines. all participants provided written informed consent.",Method,Yes,No,N/A,N/A,N/A,N/A,N/A,No,No,N/A,No,N/A,N/A,N/A,N/A
1/9/2020,2020,10.5271/sjweh.3890,"Accidents, Mortality, Suicide, Workload",Missing,N/A,Method,Yes,No,N/A,N/A,N/A,N/A,N/A,No,No,N/A,No,N/A,N/A,N/A,N/A
15/7/2019,2019,10.3390/ijerph16142523,"Air Pollutants, Air Pollution, Particulate Matter, Residence Characteristics, Social Justice, Urban Health",Missing,N/A,Method,Yes,Yes,Online,https://www.mdpi.com/1660-4601/16/14/2523/s1,N/A,mdpi.com,N/A,No,No,N/A,No,N/A,N/A,N/A,N/A
18/10/2019,2019,10.3390/ijms20205167,"Genetic Variation, Genome, Mitochondrial, Genomics, Introns, Mycorrhizae, Phylogeny",Missing,"4.6. availability of data the  r. salebrosus  and  r. vinicolor  mitogenome sequences were submitted to genbank under accession number mh794152 and mh794153, respectively.",Method,Yes,Yes,Online,"https://www.mdpi.com/1422-0067/20/20/5167/s1, https://www.ncbi.nlm.nih.gov/genome/browse#!/organelles/",N/A,mdpi.com,Method,Yes,No,N/A,No,N/A,N/A,N/A,N/A
01/04/2020,2020,10.3390/ijerph17072394,"Smokers, Tobacco Products",Missing,N/A,Method,Yes,Yes,Online,https://www.mdpi.com/1660-4601/17/7/2394/s1,N/A,mdpi.com,Method,Yes,No,N/A,No,N/A,N/A,N/A,N/A
11/4/2020,2020,10.3390/ijerph17082622,"Bronchoconstriction, Interleukin-10, Interleukin-8, Running",Missing,2.5. data availability statement the datasets generated and/or analyzed during the current study are available from the corresponding author upon request.,Method,Yes,Yes,Online,https://www.mdpi.com/1660-4601/17/8/2622/s1,N/A,mdpi.com,Method|Fulltext,Yes,No,N/A,No,N/A,N/A,N/A,N/A
30/4/2022,2022,10.3390/nu14091889,"Intestinal Diseases, Intestinal Failure, Parenteral Nutrition, Home, Short Bowel Syndrome",Missing,data availability statement restrictions apply to the availability of these data. data were obtained from each contributing center and are available from the corresponding author with the permission of the coordinators of the contributing centers.,Method,Yes,Yes,Online,"https://www.mdpi.com/article/10.3390/nu14091889/s1, 10.3390/nu14091889/s1",N/A,mdpi.com,DA|Method,Yes,Yes,Online,No,N/A,N/A,N/A,N/A
7/9/2021,2021,10.1186/s12884-021-04074-z,"Family Planning Policy, Health Services Needs and Demand, Maternal Health Services, Medical Staff, Hospital, Parturition, Tertiary Care Centers, Workload",Missing,"availability of data and materials datasets are not publicly available due to the fact that it contains personal information, but are available as de-identified format from the corresponding author on reasonable request.",Method,Yes,No,N/A,N/A,N/A,N/A,N/A,No,No,N/A,No,N/A,N/A,N/A,N/A
21/1/2020,2020,10.3390/toxins12020062,"Antigens, CD, Cadherins, Cresols, Endothelium, Vascular, Renal Insufficiency, Chronic, Sulfuric Acid Esters, Toxins, Biological, src-Family Kinases",Missing,N/A,Method,Yes,No,N/A,N/A,N/A,N/A,N/A,No,No,N/A,No,N/A,N/A,N/A,N/A
2/3/2020,2020,10.1038/s41598-020-60454-z,"Avicennia, Forests, Introduced Species, Wetlands",Missing,N/A,Method,Yes,No,N/A,N/A,N/A,N/A,N/A,No,No,N/A,No,N/A,N/A,N/A,N/A
25/10/2019,2019,10.1001/jamanetworkopen.2019.14061,"Child Development, Language Development, Pregnancy Complications, Infectious, Zika Virus Infection",Missing,N/A,Method,Yes,No,N/A,N/A,N/A,N/A,N/A,No,No,N/A,No,N/A,N/A,N/A,N/A
18/9/2021,2021,10.3390/s21186263,"Deep Learning, Hyperglycemia",Missing,"data availability statement restrictions apply to the availability of these data. data was obtained from research center for applied sciences, academia sinica, taiwan and are available from the authors with the permission of research center for applied sciences, academia sinica, taiwan.",Method,Yes,No,N/A,N/A,N/A,N/A,Fulltext,Yes,No,N/A,No,N/A,N/A,N/A,N/A
24/8/2020,2020,10.1186/s12872-020-01654-3,"Antihypertensive Agents, Blood Pressure, Hypertension, Hypokalemia, Potassium",Missing,N/A,Method,Yes,Yes,Online,"http://www.dst.dk/en/omds/organisation/telefonbogorg.aspx?kontor=13&tlfbogsort=sektion, https://www.datatilsynet.dk/english/the-danish-data-protection-agency/contact/, https://www.dst.dk/en/tilsalg/forskningsservice",N/A,Datatilsynet,Method,Yes,No,N/A,No,N/A,N/A,N/A,N/A
03/06/2021,2021,10.3390/v13061066,"Aedes, Arbovirus Infections, Arboviruses, Argonaute Proteins, Mosquito Vectors",Missing,"data availability statement the rna sequencing data generated here is available in the ncbi sequence read archive (prjna734154). the rt-qpcr and luciferase data is available under  http://dx.doi.org/10.5525/gla.researchdata.1154 , accessed on 19 may 2021.",Method,Yes,Yes,Online,"10.3390/v13061066/s1, http://dx.doi.org/10.5525/gla.researchdata.1154, 10.5525/gla.researchdata.1154, https://www.mdpi.com/article/10.3390/v13061066/s1",PRJNA734154,NCBI Bioproject,Method,Yes,No,N/A,No,N/A,N/A,N/A,N/A
27/3/2021,2021,10.1007/s00484-021-02101-4,"Thermosensing, Wind",Missing,N/A,Method,Yes,No,N/A,N/A,N/A,N/A,Method,Yes,No,N/A,No,N/A,N/A,N/A,N/A
6/3/2020,2020,10.1186/s12889-020-8393-6,"Ethnicity, Metabolic Syndrome",Missing,"data collection participants were required to complete a demographic questionnaire and a health behaviour questionnaire, which included smoking, alcohol consumption and physical activity. trained personnel assisted the participants in completing the questionnaires.|availability of data and materials the datasets used and/or analysed during the current study are available on reasonable request.",Method,Yes,Yes,Online,N/A,N/A,N/A,N/A,No,No,N/A,No,N/A,N/A,N/A,N/A
11/12/2021,2021,10.1002/advs.202103098,"Breast Neoplasms, Cell Adhesion, Nanoparticles, Peptides",Missing,data availability statement the data that support the findings of this study are available from the corresponding author upon reasonable request.,Method,Yes,Yes,Online,temperature.CTC/Cancer,N/A,N/A,Fulltext,Yes,No,N/A,No,N/A,N/A,N/A,N/A
6/4/2022,2022,10.1038/s41598-022-09906-2,"Drinking Water, Groundwater, Water Pollutants, Chemical",Missing,data availability all data generated or analyzed during this study are included in this published article and supplementary material.,Method,Yes,Yes,Online,"https://cran.r-project.org/bin/windows/base/, https://www.esri.com/en-us/arcgis/products/arcgis-pro/, https://support.microsoft.com/en-us/office",N/A,Comprehensive R Archive Network,Method|Fulltext,Yes,No,N/A,Yes,10.1002/essoar.10506708.1,2021/04/19,http://dx.doi.org/10.1002/essoar.10506708.1,Earth and Space Science Open Archive
12/1/2022,2022,10.3390/ijms23020811,"Drug Discovery, Models, Molecular, Small Molecule Libraries, Software, Web Browser",Missing,"3.2. methods available for screening several 2d and 3d methods are available to perform similarity searches using swisssimilarity. among 2d methods, users can opt for fp2 [ 13 ], ecfp4 [ 17 ], mhfp6 [ 20 ], 2d pharmacophore [ 21 , 22 ], and erg [ 23 ] fingerprints. all these approaches have already been assessed by their authors in the respective publications. in addition, it is possible to search for compounds that have the same murcko scaffold or generic murcko scaffold (in which all atoms are converted to carbons and all bonds to single bonds) as a query molecule. at the same time, 3d-similar molecules can be searched by using es5d and e3fp. as recommended in the original article, e3fp fingerprints are calculated from the top three low-energy molecular conformations [ 19 ], while es5d vectors are calculated for up to 20 conformers generated for a given molecule, as described previously [ 3 ]. for 3d searches, the similarities of all geometries of a query molecule are evaluated against all geometries of each compound in the screened library. due to the significant computational time required for 3d screening, those methods are not available for very large libraries. last but not least, swisssimilarity also features a “combined” 2d/3d screening method, which is based on both fp2 and es5d similarity metrics and which has been initially implemented in the reverse screening algorithm of the swisstargetprediction web tool [ 35 ]. more precisely, the returned combined score corresponds to the probability of sharing a common protein target by two bioactive compounds. it is calculated using logistic regression based on two features, i.e., fp2 and es5d similarity values. this option is also not available for very large chemical collections.",Method,Yes,No,N/A,"www.mozilla.org/firefox/, www.google.com/chrome/, http://www.swisssimilarity.ch",N/A,N/A,DA|Method,Yes,No,N/A,No,N/A,N/A,N/A,N/A
6/4/2022,2022,10.1186/s12884-022-04631-0,"Clinical Deterioration, Early Warning Score, Heart Arrest",Missing,"study population and data collection we conducted a retrospective cohort study of all adult (age ≥ 18 years) patients admitted to a hospital ward following transfer from labor and delivery at the university of chicago medicine from november 2008 to december 2018. the cohort includes both postpartum patients as well as patients who were initially admitted to labor and delivery prior to transfer to the antepartum ward. patient demographic information as well as time- and location-stamped vital sign and laboratory results were obtained from electronic health record data (epic; verona, wi).|availability of data and materials as the data are high granular in nature and contain potentially sensitive patient information, public sharing of the data would breach the university of chicago’s irb protocol requirements. interested researchers may contact mary akel, university of chicago, via email at makel@medicine.bsd.uchicago.edu for data access requests.",Method,Yes,Yes,Online,N/A,N/A,N/A,N/A,No,No,N/A,No,N/A,N/A,N/A,N/A
5/5/2020,2020,10.1186/s41235-020-00211-y,"Attention, Imagination, Practice, Psychological, Space Perception, Thinking",Missing,availability of data and materials the stimuli and datasets used during the current study are available from the corresponding author on reasonable request.,Method,Yes,No,N/A,N/A,N/A,N/A,Method,Yes,No,N/A,No,N/A,N/A,N/A,N/A
08/07/2020,2020,10.4269/ajtmh.20-0418,"Anxiety, Betacoronavirus, Coronavirus Infections, Health Knowledge, Attitudes, Practice, Pandemics, Pneumonia, Viral, Students",Missing,N/A,Method,Yes,No,N/A,N/A,N/A,N/A,N/A,No,No,N/A,No,N/A,N/A,N/A,N/A
06/07/2020,2020,10.3390/v12070729,"HIV-1, Ribonuclease H, Human Immunodeficiency Virus",Missing,N/A,Method,Yes,Yes,Online,https://www.mdpi.com/1999-4915/12/7/729/s1,N/A,N/A,Method,Yes,No,N/A,No,N/A,N/A,N/A,N/A
13/5/2022,2022,10.2196/33235,"COVID-19, Vaccines",China,"measures and data collection the questionnaire comprised three parts: sociodemographic characteristics, parental vaccine hesitancy, and willingness to receive covid-19 vaccination. the first survey comprised questions regarding sociodemographic characteristics, including the participant’s age, sex, educational level, annual household income, and health care occupation status. the subsequent surveys added four additional questions regarding the number of people in residence, contacts per day, self-reported health, and influenza vaccination status in the last season. these questions were all specific to participants. the questions regarding parental vaccine hesitancy toward routine childhood vaccines referred to the 10-item vaccine hesitancy scale (vhs) developed by the strategic advisory group of experts [ 25 ]. the 10-item vhs has been used in numerous countries with acceptable reliability and validity [ 26 - 28 ]. we used a 5-point scale (strongly disagree: 1; disagree: 2; neither agree nor disagree: 3; agree: 4; or strongly agree: 5) for responses to each vhs item. during the vaccine trial period, one question, “if the covid-19 vaccine was available, will you vaccinate yourself?” was used to measure the participants’ willingness to accept a covid-19 vaccination (responses: “yes,” “not sure,” and “no”). the next question asked for specific reasons for acceptance or refusal (if “yes,” “why?” or if “no/not sure,” “why?”). the other two surveys replaced this question with “will you vaccinate against covid-19 for yourself?” as the covid-19 vaccine had become available in china in january 2021. other options were also added to the survey for answers regarding the reasons for accepting or refusing a covid-19 vaccination. these questionnaires are provided in  multimedia appendix 1 . covid-19 vaccination records were derived from the information management system for covid-19 vaccines to assess actual vaccination decisions. furthermore, governmental vaccination strategies were obtained from the official websites of relevant health authorities ( multimedia appendix 2 ).",Method,Yes,No,N/A,N/A,N/A,N/A,Method,Yes,No,N/A,Yes,10.2196/preprints.33235,2022/05/13,http://dx.doi.org/10.2196/preprints.33235,Journal of Medical Internet Research
01/04/2019,2019,10.7554/eLife.43818,"Drinking Behavior, Subfornical Organ, Water, Wnt Proteins, Wnt Signaling Pathway, beta Catenin",Germany,"data availability all data generated or analysed during this study are included in the manuscript and supporting files. source data files are provided for figures 4f-h, 5c, 6b, 7d, 8e-f, 9c as well as in figure 4-figure supplement 1c, figure 4-figure supplement 3d, figure 8-figure supplement 1b. raw data for all quantifications are provided in a separated ms excel documents.",Method,Yes,Yes,Online,"10.7554/eLife.43818.022Figure, 10.7554/eLife.43818.019Figure, 10.7554/eLife.43818.009As, 10.7554/eLife.43818.006Figure, SFO.Wnt/β-catenin, 10.7554/eLife.43818.024Figure, 10.7554/eLife.43818.003Figure, 10.7554/eLife.43818.008Figure, 10.7554/eLife.43818.005Figure, 10.7554/eLife.43818.029Figure, 10.7554/eLife.43818.004Figure, 10.7554/eLife.43818.026Figure, 10.7554/eLife.43818.010Figure, 10.7554/eLife.43818.011Figure, 10.7554/eLife.43818.013Figure, 10.7554/eLife.43818.014Figure, 10.7554/eLife.43818.025Figure, 10.7554/eLife.43818.018Figure, 10.7554/eLife.43818.028Figure, 10.7554/elife.43818.036, 10.7554/eLife.43818.032Figure, 10.7554/eLife.43818.007Figure",N/A,N/A,N/A,No,No,N/A,No,N/A,N/A,N/A,N/A
31/1/2020,2020,10.1111/cpr.12769,"Oocytes, RNA, Ribosomal, 5.8S",Missing,data availability statement the data that support the findings of this study are available from the corresponding author upon reasonable request.,Method,Yes,No,N/A,N/A,N/A,N/A,N/A,No,No,N/A,No,N/A,N/A,N/A,N/A
6/7/2020,2020,10.1186/s40359-020-00440-2,"Adaptation, Psychological, Automobile Driving, Fatigue, Motor Vehicles",Missing,availability of data and materials all data generated and analyzed during the study are included in this article.,Method,Yes,No,N/A,N/A,N/A,N/A,N/A,No,No,N/A,No,N/A,N/A,N/A,N/A
15/3/2019,2019,10.1186/s12957-019-1591-y,"Brain Neoplasms, Coffee, Drinking, Tea",Missing,availability of data and materials the tables and figures supporting the conclusions of this article are included within the article.,Method,Yes,Yes,Online,N/A,N/A,N/A,N/A,No,No,N/A,No,N/A,N/A,N/A,N/A
20/8/2021,2021,10.1186/s41235-021-00322-0,"Memory, Short-Term",Missing,"availability of data and material all of the relevant data, experiment code and analysis scripts are published on the osf website. additional data and scripts are available from the corresponding author upon request.  https://osf.io/4v3kp .",Method,Yes,Yes,Online,https://osf.io/4v3kp,N/A,Open Science Framework,DA,Yes,Yes,Online,No,N/A,N/A,N/A,N/A
21/12/2020,2020,10.1242/bio.054544,"Autophagy, Malaria, Cerebral, Plasmodium falciparum, Salicylic Acid",Missing,N/A,Method,Yes,No,N/A,N/A,N/A,N/A,N/A,No,No,N/A,No,N/A,N/A,N/A,N/A
25/2/2021,2021,10.1038/s41598-021-84307-5,"Diabetes Mellitus, Type 2, Life Style",Missing,"data source and study population this study used data obtained from the nhis database. in 2000, the nhis was established as the single insurer for the entire korean population. the nhis also provides regular health check-up programs for the public, and adults are recommended to undergo a check-up at least once every 2 years. information on the nhis has been published elsewhere 34 . the nhis database is available to researchers, and anonymized data are supplied if an official review committee has approved the study protocol. this study was conducted according to the declaration of helsinki and was approved by the institutional review board of seoul national university hospital (irb no. e-1908-027-1052). there are various data subsets of the nhis database, including the qualification, claim, health check-up, and death information databases 35 . together, these databases comprise comprehensive information about demographics, disease diagnosis (according to the 10th revision of the international classification of diseases [icd-10] codes), laboratory exams and imaging studies, medical treatments, and hospitalization. we screened 2,671,490 dm patients older than 30 years between 2009 and 2012. from this initial population, we excluded 63,015 subjects whose data on lifestyle behaviors was not available. in addition, we excluded further 57,439 individuals who had a previous history of af. therefore, 2,551,036 subjects were ultimately included and followed up to 2017.",Method,Yes,Yes,Online,N/A,N/A,N/A,DA|Method,Yes,Yes,Online,Yes,10.2337/figshare.19165403.v1,2022/03/09,http://dx.doi.org/10.2337/figshare.19165403.v1,American Diabetes Association
26/2/2019,2019,10.3390/s19050993,Nose,Missing,N/A,Method,Yes,No,N/A,N/A,N/A,N/A,Fulltext,Yes,No,N/A,No,N/A,N/A,N/A,N/A
5/11/2019,2019,10.1038/s41598-019-52014-x,None,Missing,"data availability the data that support the findings of this study are available from the corresponding author, r.r., or the first author, m.g., upon reasonable request.",Method,Yes,Yes,Online,N/A,N/A,N/A,Method,Yes,No,N/A,No,N/A,N/A,N/A,N/A
15/6/2021,2021,10.1186/s12866-021-02245-8,"Acenaphthenes, Anti-Bacterial Agents, Heterocyclic Compounds, 3-Ring, Microbiota, Urinary Tract Infections",Missing,availability of data and materials dna sequence data and metadata are available from the national centre for biotechnology information sequence read archive (sra) under bioproject id:  prjna630295 ]. metadata are formatted following the mimarks standard and included in the bioproject repository. additional files are available as supplementary electronic material. code to reproduce the analysis is available at  https://github.com/andreanuzzo/gepotidacin_phiia_microbiome . this study is registered at  clinicaltrials.gov  with the identifier nct03568942. anonymized individual participant data and study documents can be requested for further research from  www.clinicalstudydatarequest.com .,Method,Yes,Yes,Online,"www.clinicalstudydatarequest.com, https://github.com/andreanuzzo/gepotidacin_phiia_microbiome","NCT03568942, PRJNA630295","ClinicalStudyDataRequest.com (CSDR), Github ,  NCBI Bioproject, ClinicalTrials.gov",DA|Method,Yes,Yes,Online,No,N/A,N/A,N/A,N/A
1/10/2020,2020,10.1038/s41598-020-73093-1,"B-Lymphocytes, Regulatory, STAT3 Transcription Factor, T-Lymphocytes, Regulatory, Th1 Cells, Th17 Cells",Missing,N/A,Method,Yes,No,N/A,N/A,N/A,N/A,N/A,No,No,N/A,No,N/A,N/A,N/A,N/A
10/8/2020,2020,10.1186/s12984-020-00740-z,"Stroke, Stroke Rehabilitation, Transcutaneous Electric Nerve Stimulation, Wearable Electronic Devices",Missing,availability of data and materials the datasets generated and/or analyzed during the current study will be shared upon reasonable request. all data are included in this published article.,Method,Yes,Yes,Online,www.saehan.com,N/A,N/A,DA|Method|Fulltext,Yes,No,N/A,No,N/A,N/A,N/A,N/A
26/10/2021,2021,10.1186/s12903-021-01912-6,"Health Expenditures, Income",Missing,availability of data and materials data are available from the authors upon reasonable request and with permission of the statistical center of iran.,Method,Yes,No,N/A,N/A,N/A,N/A,N/A,No,No,N/A,No,N/A,N/A,N/A,N/A
13/4/2019,2019,10.1186/s12883-019-1290-x,"Blood Urea Nitrogen, Cerebral Hemorrhage, Creatinine, Diabetes Complications, Stroke",Missing,"data collection and outcome the following data were collected by reviewing the patients’ medical records: demographic characteristics (age and gender), stroke risk factors (history of diabetes mellitus [dm], hypertension, dyslipidaemia, atrial fibrillation [af], smoking status, alcohol consumption), interval of symptom onset, stroke severity on admission and laboratory data. in addition, the data on stroke severity was assessed using the national institutes of health stroke scale (nihss) from the case files [ 23 ]. ht was defined as haemorrhage inside the infarct region or parenchyma outside the infarct territory on a follow-up ct or mri [ 24 ].|availability of data and materials the datasets used and/or analysed during the current study are available from the corresponding author on reasonable request.",Method,Yes,Yes,Online,N/A,N/A,N/A,N/A,No,No,N/A,No,N/A,N/A,N/A,N/A
15/4/2021,2021,10.1186/s12889-021-10778-w,"Sick Leave, Workplace",Missing,availability of data and materials the datasets generated and analyzed in the current study are not publicly available to protect the anonymity of participants.,Method,Yes,No,N/A,N/A,N/A,N/A,N/A,No,No,N/A,No,N/A,N/A,N/A,N/A
26/6/2020,2020,10.1038/s41598-020-67166-4,"Developing Countries, Mobility Limitation",Missing,data availability the world health survey (whs) data that support the findings of this study are available from the central data catalog of the world health organisation ( http://apps.who.int/healthinfo/systems/surveydata/index.php/catalog/whs ). un world population prospects data can be obtained from the united nations ( https://population.un.org/wpp/download/standard/population/ ).,Method,Yes,Yes,Online,"http://apps.who.int/healthinfo/systems/surveydata/index.php/catalog/whs, https://population.un.org/wpp/download/standard/population/",N/A,World Health Organization,N/A,No,No,N/A,No,N/A,N/A,N/A,N/A
19/2/2020,2020,10.3390/ijerph17041350,"Schizophrenia, Sleep Initiation and Maintenance Disorders",Missing,N/A,Method,Yes,Yes,Online,https://www.mdpi.com/1660-4601/17/4/1350/s1,N/A,N/A,N/A,No,No,N/A,No,N/A,N/A,N/A,N/A
14/10/2020,2020,10.1186/s12916-020-01789-2,"Coronavirus Infections, Models, Biological, Pandemics, Pneumonia, Viral",Missing,availability of data and materials all analysis code and data are available at  https://github.com/kevinvzandvoort/covid19-response-strategies-african-settings .,Method,Yes,Yes,Online,https://github.com/kevinvzandvoort/covid19-response-strategies-african-settings,N/A,Github,DA,Yes,Yes,Online,Yes,10.1101/2020.04.27.20081711,2020/05/03,http://dx.doi.org/10.1101/2020.04.27.20081711,medRxiv
18/9/2020,2021,10.1038/s41374-020-00485-2,"Retinal Neoplasms, Retinoblastoma, Transient Receptor Potential Channels",Missing,N/A,Method,Yes,No,N/A,N/A,N/A,N/A,N/A,No,No,N/A,No,N/A,N/A,N/A,N/A
14/9/2020,2020,10.1186/s12905-020-01063-w,"Exercise, Hot Flashes, Menopause, Sweat Gland Diseases, Sweating",Missing,availability of data and materials the datasets used and/or analysed during the current study are available from the corresponding author on reasonable request.,Method,Yes,Yes,Online,N/A,N/A,N/A,N/A,No,No,N/A,No,N/A,N/A,N/A,N/A
12/8/2020,2020,10.3390/ijerph17165845,"Environmental Exposure, Geographic Information Systems, Geographic Mapping, Uncertainty",Missing,N/A,Method,Yes,Yes,Supplementary Information|Online,https://www.mdpi.com/1660-4601/17/16/5845/s1,N/A,N/A,Method|Supplementary,Yes,Yes,Online,No,N/A,N/A,N/A,N/A
7/12/2020,2020,10.1038/s41467-020-20054-x,"Extracellular Matrix, Proteomics",Missing,"data availability the proteomics data generated and analyzed in this study has been deposited in the proteomics identification database (pride) number  pxd022207 . rna-sequencing data has been deposited in gene expression omnibus (geo) number  gse158276 . the remaining data are available within the article, supplementary information or available from the authors upon request.|code availability script and auxiliary data needed to reconstruct “spatial analysis of distances between crypts” analysis files are available from github [ https://github.com/wis-micc-cellobservatory/crypts_spatialorganization/ ] and from zenodo [10.5281/zenodo.4172577].",Method,Yes,Yes,Supplementary Information|Online,"https://github.com/wis-micc-cellobservatory/crypts_spatialorganization/, 10.5281/zenodo.4172577","PXD022207, GSE158276","Github, Zenodo ,  PRIDE Archive, Gene Expression Omnibus",DA|Method|Fulltext,Yes,Yes,Online,No,N/A,N/A,N/A,N/A
12/8/2019,2019,10.1186/s12864-019-6004-7,"Adaptation, Physiological, Environment, Genomics, Host Specificity, Rhizobiaceae",Missing,availability of data and materials the complete genome sequence of  e .  alkalisoli  yic4027 has been submitted to genbank under the accession number cp034909-cp034911.,Method,Yes,Yes,Supplementary Information|Online,N/A,N/A,N/A,N/A,No,No,N/A,No,N/A,N/A,N/A,N/A
07/05/2022,2022,10.3390/nu14091958,"Diet, Western, Thermogenesis",Missing,N/A,Method,Yes,No,N/A,N/A,N/A,N/A,N/A,No,No,N/A,No,N/A,N/A,N/A,N/A
24/6/2019,2019,10.1186/s12939-019-1006-2,"Health Care Reform, Health Expenditures, Health Services Accessibility, Healthcare Financing, Insurance, Health",Missing,"availability of data and materials all the data for this study is available and it can be accessed at the kemri-wellcome trust research programme, subject to institutional data governance committee policies.",Method,Yes,No,N/A,N/A,N/A,N/A,N/A,No,No,N/A,No,N/A,N/A,N/A,N/A
19/6/2019,2019,10.1038/s41598-019-45426-2,"Indriidae, Rainforest",Missing,data availability the datasets generated during and/or analysed during the current study are available from the corresponding author on reasonable request.,Method,Yes,Yes,Online,N/A,N/A,N/A,N/A,No,No,N/A,No,N/A,N/A,N/A,N/A
18/1/2022,2022,10.1172/JCI152042,"Antibodies, Neutralizing, Antibodies, Viral, Immunologic Memory, Memory B Cells, SARS-CoV-2",Missing,"sample processing and data collection. venepuncture blood samples collected in lithium heparin–coated tubes, and serum separation tubes were used for isolation of pbmcs and serum, respectively. pbmcs were isolated by density centrifugation using pancoll human (pan-biotech). isolated pbmcs were frozen in fbs supplemented with 10% dmso (milliporesigma). prior to use, samples were thawed and washed in pbs. serum was collected following centrifugation and stored at –80°c prior to use. clinical and laboratory data including age, sex, symptoms, and sars-cov-2 rt-pcr status at the time of the initial outbreak were available for participants ( supplemental table 1  and ref.  1 ).",Method,Yes,Yes,Online,10.1172/JCI152042DS1,N/A,N/A,N/A,No,No,N/A,Yes,10.1101/2021.05.30.446322,2021/05/31,http://dx.doi.org/10.1101/2021.05.30.446322,bioRxiv
11/2/2019,2019,10.7554/eLife.43114,"Mental Recall, Parietal Lobe, Temporal Lobe",Canada,"data availability all data generated during this study are included in the manuscript and supporting files. source data files have been provided for figures 2, 3c, and 4c. the following dataset was generated: hebscher m meltzer ja gilboa a 2018 data from: a causal role for the precuneus in network-wide theta and gamma oscillatory activity during complex memory retrieval dryad digital repository 10.5061/dryad.gf4f363",Method,Yes,Yes,Online,"10.7554/eLife.43114.010Figure, 10.7554/elife.43114.013, 10.7554/eLife.43114.011Figure, 10.5061/dryad.gf4f363, 10.7554/eLife.43114.003Figure, 10.7554/eLife.43114.004Figure, 10.7554/eLife.43114.005Figure, 10.7554/eLife.43114.008Figure, 10.7554/eLife.43114.007Table",N/A,Dryad Digital Repository,Method,Yes,No,N/A,Yes,10.1101/592436,2019/03/29,http://dx.doi.org/10.1101/592436,bioRxiv
3/10/2020,2021,10.1007/s11356-020-10963-1,"Air Pollutants, Air Pollution, Ischemic Attack, Transient",Missing,data availability the data on air pollution and meteorological factors can be obtained from the national air pollution monitoring system ( http://www.cnemc.cn ) and the china meteorological data sharing service system ( https://data.cma.cn ). the data on admissions for tia are available from the corresponding author upon reasonable request.,Method,Yes,Yes,Online,"https://data.cma.cn, http://www.cnemc.cn",N/A,N/A,Method,Yes,No,N/A,No,N/A,N/A,N/A,N/A
30/11/2021,2021,10.1038/s41467-021-27076-z,"Hepatitis C, Microfluidics, Molecular Diagnostic Techniques, Nucleic Acid Amplification Techniques",Missing,"source data   source data|data availability the raw data, sequence alignment, gel blots and images that support the findings of this study are also available in university of glasgow’s enlighten: research data with the identifier: 10.5525/gla.researchdata.1127.  source data  are provided with this paper.",Method,Yes,Yes,Online,10.5525/gla.researchdata.1127,N/A,N/A,N/A,No,No,N/A,No,N/A,N/A,N/A,N/A
13/5/2020,2020,10.1186/s12889-020-08519-6,"Domestic Violence, Health Promotion, Sex Offenses",Missing,availability of data and materials the datasets used during the current study are available from the corresponding author under reasonable request.,Method,Yes,Yes,Online,N/A,N/A,N/A,N/A,No,No,N/A,No,N/A,N/A,N/A,N/A
25/3/2020,2020,10.1186/s12904-020-00552-x,"Outcome Assessment, Health Care",Missing,availability of data and materials the datasets used during the current study are available from the corresponding author on reasonable request.,Method,Yes,Yes,Online,www.pos-pal.org,N/A,N/A,N/A,No,No,N/A,Yes,10.21203/rs.2.20850/v3,2020/03/25,http://dx.doi.org/10.21203/rs.2.20850/v3,Research Square
29/3/2021,2021,10.1155/2021/6622398,"Electric Impedance, Neck",Missing,data availability the cohort data used to support the findings of this study are restricted by the institutional review board of nagoya university graduate school of medicine in order to protect the privacy of subjects in the yakumo study.,Method,Yes,No,N/A,N/A,N/A,N/A,Method|Fulltext,Yes,No,N/A,No,N/A,N/A,N/A,N/A
6/8/2019,2019,10.1148/radiol.2019190407,"Computed Tomography Angiography, Coronary Angiography, Coronary Artery Disease, Machine Learning, Plaque, Atherosclerotic, Radiographic Image Interpretation, Computer-Assisted",Missing,N/A,Method,Yes,No,N/A,N/A,N/A,N/A,Method,Yes,No,N/A,No,N/A,N/A,N/A,N/A
9/12/2019,2019,10.1186/s12913-019-4804-8,"Community Health Nursing, Models, Nursing, State Medicine",Missing,availability of data and materials the datasets generated and/or analysed during the current study are not publicly available. this is due to the participatory approach to the study with the data potentially containing information that could compromise the research participants.,Method,Yes,Yes,Online,N/A,N/A,N/A,N/A,No,Yes,Online,No,N/A,N/A,N/A,N/A
3/12/2020,2020,10.1038/s41598-020-77952-9,"Genetic Association Studies, Genetic Predisposition to Disease, Microfilament Proteins, Podocytes, Renal Insufficiency, Chronic",Missing,N/A,Method,Yes,No,N/A,N/A,N/A,N/A,Method,Yes,No,N/A,No,N/A,N/A,N/A,N/A
27/11/2020,2020,10.1155/2020/4280467,"Computational Biology, Databases, Genetic, Gene Regulatory Networks, Protein Interaction Maps",Missing,data availability all data are available as supplementary materials and will be available online with the manuscript.,Method,Yes,Yes,Online,https://www.proteinatlas.org/search/protein_class%3AFDA+approved+drug+targets?format=tsv,N/A,N/A,Method|Fulltext,Yes,No,N/A,No,N/A,N/A,N/A,N/A
16/9/2020,2020,10.1186/s13063-020-04726-z,Alcoholism,Missing,availability of data and materials the datasets used and/or analysed during the current study are available from the corresponding author on reasonable request.,Method,Yes,Yes,Online,N/A,N/A,N/A,N/A,No,No,N/A,No,N/A,N/A,N/A,N/A
7/7/2020,2020,10.1128/mBio.00972-20,"Cross Reactions, Henipavirus, Paramyxoviridae Infections, Paramyxovirinae, T-Lymphocytes",Netherlands,N/A,Method,Yes,No,N/A,"https://www.who.int/activities/prioritizing-diseases-for-research-and-development-in-emergency-contexts, https://www.iedb.org/",N/A,World Health Organization,Method,Yes,No,N/A,No,N/A,N/A,N/A,N/A
2/5/2021,2021,10.1186/s12864-021-07582-6,"Genome-Wide Association Study, Quantitative Trait Loci",Missing,"availability of data and materials the full  r  package for the modified waveqtl is freely available on github ( https://github.com/william-denault/ffw ), and a comprehensive example run of the package is provided in the help function  ffw . the data can be accessed by sending an application to the norwegian regional committees for medical and health research ethics (rek,  https://helseforskning.etikkom.no/forside?_ikblanguagecode=us ), and upon approval, data administrators at moba ( https://www.fhi.no/studier/moba/ ) need to be contacted before secured access to the data can be granted to successful applicants. declarations",Method,Yes,Yes,Online,"https://github.com/william-denault/ffw, https://helseforskning.etikkom.no/forside?_ikblanguagecode=us, https://www.ebi.ac.uk/gwas/, https://www.ncbi.nlm.nih.gov/gap/;[25, https://www.fhi.no/studier/moba/",N/A,"Github, Folkehelseinstituttet (Norwegian Institute of Public Health)",DA,Yes,Yes,Online,No,N/A,N/A,N/A,N/A
17/7/2021,2021,10.1093/jncics/pkab068,"Aftercare, Cancer Survivors, Healthcare Disparities",Missing,"data availability  the data underlying this article cannot be shared publicly due to privacy restrictions of individuals that participated in the study. aggregated, deidentified data may be shared on reasonable request to the corresponding author.",Method,Yes,No,N/A,N/A,N/A,N/A,Method,Yes,No,N/A,No,N/A,N/A,N/A,N/A
03/04/2022,2022,10.3390/ijms23073988,"Chloroform, Melanoma",Missing,data availability statement not applicable.,Method,Yes,Yes,Online,"10.3390/ijms23073988/s1, https://www.mdpi.com/article/10.3390/ijms23073988/s1",N/A,N/A,N/A,No,No,N/A,No,N/A,N/A,N/A,N/A
13/2/2021,2021,10.3390/genes12020270,"Alpha-Ketoglutarate-Dependent Dioxygenase FTO, Genetic Predisposition to Disease, Receptor, Melanocortin, Type 4",Missing,N/A,Method,Yes,No,N/A,N/A,N/A,N/A,N/A,No,No,N/A,No,N/A,N/A,N/A,N/A
13/12/2019,2019,10.1038/s41598-019-55786-4,"Adenocarcinoma, Carcinoma, Squamous Cell, Cervical Intraepithelial Neoplasia, Conization, Suture Techniques, Uterine Cervical Neoplasms",Missing,N/A,Method,Yes,No,N/A,N/A,N/A,N/A,Fulltext,Yes,No,N/A,No,N/A,N/A,N/A,N/A
27/3/2019,2019,10.3390/ijerph16071098,"Autism Spectrum Disorder, Internet, Students, Suicide, Universities",Missing,N/A,Method,Yes,No,N/A,N/A,N/A,N/A,N/A,No,No,N/A,Yes,10.21203/rs.3.rs-1198646/v1,2022/01/11,http://dx.doi.org/10.21203/rs.3.rs-1198646/v1,Research Square
7/6/2019,2019,10.1038/s41598-019-44342-9,"Facial Nerve, Nerve Regeneration, Nerve Tissue",Missing,data availability all data generated or analyzed in this study are included in the published article.,Method,Yes,No,N/A,N/A,N/A,N/A,Method|Fulltext,Yes,No,N/A,No,N/A,N/A,N/A,N/A
25/6/2021,2021,10.1186/s12887-021-02738-5,"Chorioamnionitis, Sepsis",Missing,availability of data and materials the datasets used and/or analyzed during the current study are available from the corresponding author upon reasonable request. (correspondence to tjark.ortgies@gmx.de).,Method,Yes,No,N/A,N/A,N/A,N/A,N/A,No,No,N/A,No,N/A,N/A,N/A,N/A
13/9/2019,2019,10.1001/jamanetworkopen.2019.11421,"Accidents, Traffic, Adolescent Behavior, Attention, Impulsive Behavior, Memory, Short-Term, Neurocognitive Disorders",Missing,N/A,Method,Yes,No,N/A,N/A,N/A,N/A,N/A,No,No,N/A,No,N/A,N/A,N/A,N/A
10/11/2021,2021,10.1002/jcla.24047,Sepsis,Missing,data availability statement the datasets generated during and/or analyzed during the current study are available from the corresponding author on reasonable request.,Method,Yes,No,N/A,N/A,N/A,N/A,Method|Fulltext,Yes,No,N/A,No,N/A,N/A,N/A,N/A
11/7/2019,2019,10.3390/ijerph16142461,"Empathy, Environment, Nature, Parenting, Social Identification, Socialization",Missing,N/A,Method,Yes,No,N/A,N/A,N/A,N/A,N/A,No,No,N/A,No,N/A,N/A,N/A,N/A
13/11/2020,2020,10.1016/j.bpj.2020.10.036,"COVID-19, SARS-CoV-2",Missing,data availability additional supporting research data of our models to enable other groups to use and explore this dynamic system in atomic detail ( 77 ) may be accessed through the nsf molssi and bioexcel covid-19 molecular structure and therapeutics site at  https://covid.molssi.org/ .,Method,Yes,Yes,Online,https://covid.molssi.org/,N/A,N/A,Method|Fulltext,Yes,No,N/A,Yes,10.1101/2020.09.16.300459,2020/09/17,http://dx.doi.org/10.1101/2020.09.16.300459,bioRxiv
6/7/2021,2021,10.1038/s41467-021-24394-0,"Ecology, Flowers, Lighting, Pollination",Missing,source data source data & code|data availability source data  are provided with this paper.|code availability full analysis code is available as a supplementary information file.,Method,Yes,Yes,Online,N/A,N/A,N/A,DA|Method|Fulltext,Yes,Yes,Online,No,N/A,N/A,N/A,N/A
10/3/2022,2022,10.1038/s41598-022-07009-6,"Ecosystem, Phytoplankton",Missing,data availability the datasets and the explained code used in the current study are organized in a private github repository. the repository contents are available upon request to the corresponding authors through a shareable gitfront link.,Method,Yes,Yes,Online,https://power.larc.nasa.gov/,N/A,N/A,DA|Method,Yes,Yes,Online,No,N/A,N/A,N/A,N/A
12/2020,2020,10.3201/eid2612.191282,"Deer, Encephalitis Viruses, Tick-Borne, Encephalitis, Tick-Borne, Ixodes",Missing,N/A,Method,Yes,No,N/A,N/A,N/A,N/A,N/A,No,No,N/A,No,N/A,N/A,N/A,N/A
11/8/2020,2020,10.2196/17367,"Anxiety, Child Health Services, Child, Hospitalized, Hospitals, Pediatric",United Kingdom,N/A,Method,Yes,No,N/A,N/A,N/A,N/A,N/A,No,No,N/A,Yes,10.2196/preprints.17367,2020/08/11,http://dx.doi.org/10.2196/preprints.17367,Journal of Medical Internet Research
26/2/2020,2020,10.1186/s13071-020-3976-8,Pets,Missing,"availability of data and materials the datasets supporting the conclusions of this article are included within the article. due to commercial confidentiality, data not included in the manuscript can only be made available to  bona fide  researchers and are subject to a non-disclosure agreement.",Method,Yes,No,N/A,N/A,N/A,N/A,N/A,No,No,N/A,No,N/A,N/A,N/A,N/A
29/9/2020,2020,10.3390/nu12102987,"Consumer Behavior, Fast Foods, Food Labeling, Food Preferences, Health Behavior",Missing,N/A,Method,Yes,No,N/A,N/A,N/A,N/A,N/A,No,No,N/A,No,N/A,N/A,N/A,N/A
14/12/2021,2021,10.1186/s12909-021-03063-2,"Career Choice, Students, Medical",Missing,availability of data and materials the datasets used and/or analyzed during the current study available from the corresponding author on reasonable request.,Method,Yes,No,N/A,N/A,N/A,N/A,N/A,No,No,N/A,Yes,10.21203/rs.2.14821/v4,2020/03/25,http://dx.doi.org/10.21203/rs.2.14821/v4,Research Square
18/12/2020,2020,10.2196/24345,"COVID-19, Electronic Health Records, Pediatrics, Primary Health Care, Telemedicine",United States of America,"data source we obtained encounter data for all telemedicine and in-person visits between march 18 and may 2, 2020, from the ehr, and we identified patient panels for each practice, defined as all patients with one or more encounters at the practice in the prior two years. for each practice’s patient panel, patient demographics, date of last preventive visit, and counts of telemedicine, office, ed, and urgent care visits were obtained from the ehr. to complement this ehr-based evaluation, we also surveyed the primary care clinicians across the practice network regarding the usability, usefulness, and perception of patient and clinician experience of telemedicine.",Method,Yes,No,N/A,N/A,N/A,N/A,N/A,No,No,N/A,Yes,10.2196/preprints.24345,2020/12/18,http://dx.doi.org/10.2196/preprints.24345,Journal of Medical Internet Research
13/3/2019,2019,10.1186/s12899-019-0038-6,"Energy Metabolism, Exercise Tolerance, Fasting, Fatty Acid-Binding Proteins, Neoplasm Proteins, Physical Conditioning, Animal",Missing,availability of data and materials the datasets used and/or analysed in the current study are available from the corresponding author upon reasonable request.,Method,Yes,No,N/A,N/A,N/A,N/A,Method|Fulltext,Yes,No,N/A,No,N/A,N/A,N/A,N/A
7/12/2020,2020,10.1155/2020/8861358,Alzheimer Disease,Missing,"2.1. data collection transcriptomic data from 74 ad patients and 66 controls were collected from the databases gse29378 ( https://www.ncbi.nlm.nih.gov/geo/query/acc.cgi?acc=gse29378 ), gse36980 ( https://www.ncbi.nlm.nih.gov/geo/query/acc.cgi?acc=gse36980 ), gse28146 ( https://www.ncbi.nlm.nih.gov/geo/query/acc.cgi?acc=gse28146 ), gse48350 ( https://www.ncbi.nlm.nih.gov/geo/query/acc.cgi?acc=gse48350 ), and gse5281 ( https://www.ncbi.nlm.nih.gov/geo/query/acc.cgi?acc=gse5281 ). the cross-platform normalized data were downloaded from the alzdata database [ 22 – 27 ]. the basal clinical information related to the samples was provided in supplement table  s1 .|data availability transcriptomic data from 74 ad patients and 66 controls were collected from the databases gse29378 ( https://www.ncbi.nlm.nih.gov/geo/query/acc.cgi?acc=gse29378 ), gse36980 ( https://www.ncbi.nlm.nih.gov/geo/query/acc.cgi?acc=gse36980 ), gse28146 ( https://www.ncbi.nlm.nih.gov/geo/query/acc.cgi?acc=gse28146 ), gse48350 ( https://www.ncbi.nlm.nih.gov/geo/query/acc.cgi?acc=gse48350 ), and gse5281 ( https://www.ncbi.nlm.nih.gov/geo/query/acc.cgi?acc=gse5281 ). the cross-platform normalized data were downloaded from alzdata database. the clinical information related to the samples was provided in supplement table s1.",Method,Yes,Yes,Online,"https://www.ncbi.nlm.nih.gov/geo/query/acc.cgi?acc=gse29378, https://www.ncbi.nlm.nih.gov/geo/query/acc.cgi?acc=gse36980, https://www.ncbi.nlm.nih.gov/geo/query/acc.cgi?acc=gse5281, https://www.ncbi.nlm.nih.gov/geo/query/acc.cgi?acc=gse48350, https://www.ncbi.nlm.nih.gov/geo/query/acc.cgi?acc=gse28146","GSE29378, GSE48350, GSE5281, GSE36980, GSE28146",Gene Expression Omnibus,N/A,No,No,N/A,No,N/A,N/A,N/A,N/A
29/5/2021,2021,10.1186/s12889-021-11008-z,"Airports, COVID-19",Missing,additional data collection we sent a questionnaire to respondents that had provided their e-mail address for follow up questions on training and practical experience in the past 5 years (additional file  4 ). we asked whether and how often multi-disciplinary exercises were scheduled and how often they had managed an event at their point of entry in the last year (2018) and in the last 5 years.|availability of data and materials all data generated or analysed during this study are included in this published article and the additional files.,Method,Yes,Yes,Online,N/A,N/A,N/A,N/A,No,No,N/A,Yes,10.21203/rs.3.rs-33249/v1,2020/06/05,http://dx.doi.org/10.21203/rs.3.rs-33249/v1,Research Square
8/6/2020,2020,10.1038/s41598-020-66332-y,"Vagus Nerve, Vagus Nerve Stimulation",Missing,data availability the data that support the findings of this study are available from corresponding author upon reasonable request.,Method,Yes,Yes,Online,N/A,N/A,N/A,Method|Fulltext,Yes,No,N/A,Yes,10.1101/2021.01.22.427329,2021/01/26,http://dx.doi.org/10.1101/2021.01.22.427329,bioRxiv
18/8/2020,2020,10.3390/cells9081915,"Anticoagulants, Blood Coagulation, Blood Specimen Collection, Dipyridamole, Edetic Acid, MicroRNAs, Sodium Citrate",Missing,N/A,Method,Yes,Yes,Online,https://www.mdpi.com/2073-4409/9/8/1915/s1,N/A,N/A,N/A,No,No,N/A,No,N/A,N/A,N/A,N/A
01/06/2020,2020,10.3390/nu12061634,"Antioxidants, Athletes, Athletic Performance, Dietary Supplements, Flavonoids, Oxidative Stress, Phytotherapy, Plant Extracts, Running",Missing,N/A,Method,Yes,Yes,Online,https://www.mdpi.com/2072-6643/12/6/1634/s1,N/A,N/A,Method|Fulltext,Yes,No,N/A,No,N/A,N/A,N/A,N/A
25/2/2019,2019,10.1038/s41409-019-0483-7,"Hematopoietic Stem Cell Transplantation, Transplantation Conditioning, Transplantation, Homologous",Missing,N/A,Method,Yes,No,N/A,N/A,N/A,N/A,N/A,No,No,N/A,No,N/A,N/A,N/A,N/A
28/4/2021,2021,10.3390/ijms22094631,"Brassica rapa, Flowers, MADS Domain Proteins, Nitrogen, Plant Proteins",Missing,data availability statement all raw sequences were deposited in the genbank gene expression omnibus (geo) under the accession numbers gse106444 (for previous “4004” rna-seq duplicates) and gse139375.,Method,Yes,Yes,Online,"http://brassicadb.org/brad/, https://www.mdpi.com/article/10.3390/ijms22094631/s1, http://www.geneontology.org, 10.3390/ijms22094631/s1","GSE139375, GSE106444",Gene Expression Omnibus,N/A,No,No,N/A,No,N/A,N/A,N/A,N/A
25/5/2020,2020,10.2196/18638,"Coronavirus Infections, Emigration and Immigration, Models, Theoretical, Pandemics, Pneumonia, Viral",China,"data sources model input data 1: new since january 17, 2020, various regions have released new data. the new data were crawled from [ 8 ]. model input data 2: population to detect ongoing trends of the covid-19 epidemic, the daily incoming immigration population data, which were distinguished from different source regions, were crawled from [ 20 ]. since there were no data sources regarding immigration population data in regions such as hong kong, macao, and taiwan, and interstate traffic from hubei has been shut down since late january, these regions were excluded from this analysis. however, the immigration populations emigrating from hubei to other regions were included in this study. all statistical analyses were conducted using python version 3.7 (python software foundation).",Method,Yes,No,N/A,N/A,N/A,N/A,DA|Method,Yes,No,N/A,Yes,10.2196/preprints.18638,2020/03/09,http://dx.doi.org/10.2196/preprints.18638,Journal of Medical Internet Research
10/12/2019,2019,10.1038/s41467-019-13476-9,"Hypersensitivity, Motor Endplate, Osteoclasts, Sensory Receptor Cells, Spine",Missing,source data   source data,Method,Yes,Yes,Online,N/A,N/A,N/A,N/A,No,No,N/A,No,N/A,N/A,N/A,N/A
27/12/2019,2019,10.1038/s41598-019-56772-6,"Centrifugation, Enzyme-Linked Immunosorbent Assay, Lab-On-A-Chip Devices, Microfluidic Analytical Techniques",Missing,N/A,Method,Yes,No,N/A,a.u.mL/ng,N/A,N/A,N/A,No,No,N/A,No,N/A,N/A,N/A,N/A
13/1/2021,2021,10.3390/genes12010093,"Cloning, Molecular, Crustacea, Evolution, Molecular, Hemocyanins, Phylogeny",Missing,N/A,Method,Yes,No,N/A,N/A,N/A,N/A,Method|Fulltext,Yes,No,N/A,No,N/A,N/A,N/A,N/A
17/8/2020,2020,10.1038/s41598-020-70623-9,"Air Filters, Anti-Bacterial Agents, Betacoronavirus, Coronavirus Infections, Masks, Membranes, Artificial, Pandemics, Pneumonia, Viral, Respiratory Protective Devices, Sodium Chloride",Missing,data availability all data generated or analysed during this study are included in this published article (and its supplementary information files).,Method,Yes,Yes,Online,N/A,N/A,N/A,N/A,No,No,N/A,No,N/A,N/A,N/A,N/A
3/7/2019,2019,10.1007/s13524-019-00798-y,"Birth Intervals, Developing Countries, Infant Mortality",Missing,"data demographic and health surveys this study used data on 77 countries and 207 waves of the demographic and health surveys (dhs) (see table  a1  in the online appendix for list of included countries and their respective numbers of cases). the dhs is a household survey, with a separate survey for women aged 15–49. the household response rates in the surveys used in this study range from 83.8 % to 99.9 %, with a mean of 97.5 % and standard deviation of 2.45 %. the response rates for the woman’s questionnaire range from 77.0 % to 99.6 %, with a mean of 93.6 % and standard deviation of 3.92 %. our analyses are based on the self-reported fertility histories of each woman surveyed. the outcome of interest in this study is infant mortality, defined as mortality between birth and 12 months. we restricted the pooled data in several ways for our analysis (see fig.  a1  in the online appendix for the sample selection flow chart). first, only children born at parities 2 or higher were included in the analysis because firstborns have an undefined preceding birth interval. second, index children born as a set of a multiple birth (e.g., twin, triplet, and so on) were excluded. third, children with very long birth intervals (greater than 10 years) were excluded from the analysis given that intervals of this length are highly unusual: 99 % of birth intervals are closed within 10 years in the data. fourth, index children must have come from mothers with three or more births. this restriction was necessary because the within-family approach that we adopted requires at least two birth intervals (i.e., three births) per woman. in total, the final analytical sample included approximately 4.56 million births to more than 1.15 million women. of these children, approximately 370,000 died in the first year of life. figure  1  presents the geographical distribution of the countries included in our analysis. fig. 1 map of countries included in analysis, grouped into un subregions the distribution of birth intervals across the 77 countries is shown in fig.  2 . the mean birth interval was nearly 35 months (median = 29 months) with a standard deviation of 25 months. the distributions observed here followed typical distributions of birth spacing and were mostly similar across populations. although the majority of populations conformed to the average distribution of intervals, some exceptional populations had unusually large shares of children born after very short birth intervals. for example, 15 % of children in yemen were born following an interval less than 12 months, and for nearly one-quarter of the countries in our sample, more than 50 % of their birth intervals were less than 24 months. such a high prevalence of short intervals is not necessarily indicative of data problems. regional differences in spacing patterns across the developing world are pronounced (casterline and odden  2016 ). nevertheless, our results rely heavily on the reliability of the birth histories. therefore, to be certain that they are not biased due to misreporting of births, we also conducted several robustness checks, presented later in the article. fig. 2 distribution of preceding birth intervals (in months) in dhs countries. the bold line indicates the average distribution of all countries. world bank indicators of development to understand how the effects of birth intervals on infant mortality vary according to level of development, we linked our estimates to various indicators of development by country-year. we sourced the data from the world development indicators database, which is the primary world bank collection of development indicators, compiled from officially recognized international sources. this database presents the most current and accurate global development data available, and it includes national, regional, and global estimates. our analyses focused particularly on the national infant mortality rate (imr) and total fertility rate because these were widely available across the countries and years in the dhs data.",Method,Yes,Yes,Online,N/A,N/A,N/A,Method|Fulltext,Yes,No,N/A,No,N/A,N/A,N/A,N/A
31/7/2021,2022,10.1007/s10198-021-01350-9,"Budgets, Risk Adjustment",Missing,"data we used the dataset produced for the refreshment of the resource allocation formula for adult secondary mental health care in england [ 23 ]. this includes routinely available person level data on use and cost of mental health care services in 2015 linked with need and supply individual, area and gp practice variables in the two previous years (financial years, 1 april to 31 march) for all 43,750,558 patients over 20 years of age registered with a gp practice in england. further details on data sources, extraction and linkage are provided elsewhere [ 23 ]. person level data included mental health care contacts in outpatient settings and in the community, costed by the pay band of the professional providing care, and inpatient bed days, costed by level of intensity. psychological therapies were included. specialised services that are nationally commissioned (such as bed days in low, medium and high security wards) were excluded. the individual total annual cost was truncated at £100,000 affecting less than 0.01% of all individuals. we included demographics and household composition (defined according to age and gender of individuals residing at the same address), ethnicity and physical health diagnoses associated with severe mental illness [ 38 ], which we use as observed characteristics due to reliable data quality. past care markers were derived from the mental health services dataset (mhsds) and include diagnoses and intensity of previous care contacts. we defined a set of binary indicators for whether the person had been in contact with secondary mental health services and diagnosed with any of the 44 icd-10 chapter f mental health diagnoses in 2013/14 or 2014/15. we generated a set of binary risk indicators, adapted from previous mental health formulae [ 31 ], including: the frequency of contacts with six different types of health care professionals defined by pay bands; an inpatient stay of two or more nights in a mental health trust; a stay in a secure mental health ward; and a detention under the mental health act. we included gp practice or small geographical area (lower level super output area (lsoa)) level need variables were measured in 2013/14 or 2014/15: the proportion of the lsoa population receiving out of work benefit; a binary indicator for the gp practice serving a high proportion of students; and the gp practice prevalence of severe mental illness. attributed supply variables included the driving time distance between the lsoa and closest mental health trust headquarters. we generated two sets of binary variables for the 211 ccgs and for the 42 higher-level stps of which the gp practice were part. we also generated a set of provider effects, calculated as the proportion of patients registered with a given gp practice and who were in contact at least once with each of the 66 trusts providing mental health care and reporting to the mhsds over the financial years 2013 or 2014. as an alternative, we also calculated the two components of provider effects separately as: contact with any provider (proportion of patients registered with a given gp practice who were in contact at least once with at least one trust) and contact with a specific provider (proportion in contact with each provider out of those patients who had at least one contact with one provider).",Method,Yes,Yes,Online,N/A,N/A,N/A,DA,Yes,No,N/A,No,N/A,N/A,N/A,N/A
24/2/2021,2021,10.1177/0898264321993321,"Frail Elderly, Motivational Interviewing",Missing,N/A,Method,Yes,No,N/A,N/A,N/A,N/A,N/A,No,No,N/A,No,N/A,N/A,N/A,N/A
13/10/2021,2021,10.1186/s12872-021-02307-9,"Aorta, Hydrogen Sulfide, Tunica Media",Missing,availability of data and materials the datasets used and/or analyzed in this study will be made available by the authors on reasonable request.,Method,Yes,Yes,Online,N/A,N/A,N/A,Method|Fulltext,Yes,No,N/A,Yes,10.21203/rs.3.rs-242853/v1,2021/02/26,http://dx.doi.org/10.21203/rs.3.rs-242853/v1,Research Square
12/8/2021,2021,10.1038/s41598-021-96064-6,"Macrophages, Motor Neuron Disease, Mutation, Peripheral Nerves",Missing,N/A,Method,Yes,No,N/A,N/A,N/A,N/A,N/A,No,No,N/A,No,N/A,N/A,N/A,N/A
25/9/2020,2020,10.1126/sciadv.aba9338,"Antimalarials, Malaria",Missing,N/A,Method,Yes,No,N/A,http://advances.sciencemag.org/cgi/content/full/6/39/eaba9338/dc1,N/A,N/A,N/A,No,No,N/A,Yes,10.1101/2019.12.19.882480,2019/12/20,http://dx.doi.org/10.1101/2019.12.19.882480,bioRxiv
18/9/2019,2019,10.1002/cam4.2554,"Chromosome Inversion, Leukemia, Myeloid, Acute, Obesity, Overweight, Thinness, Translocation, Genetic",Missing,"2.2 data collection and registration in the nopho‐dbh cohort data on demographics, cytogenetic abnormalities, and follow‐up information were prospectively registered by the treating center. in canada and usa, clinical research associates conducted site visits in order to abstract the required data from medical records. centers were contacted at later time points to update follow‐up information. the research ethics boards at all participating institutions/countries approved data collection and written informed consent was obtained from all patients/parents/guardians. for canadian children diagnosed between 1995 and 2004, the need for informed consent was waived given the retrospective nature of the study.|data availability statement the data that support the findings of this study are available on request from the corresponding author. the data are not publicly available due to privacy or ethical restrictions.",Method,Yes,Yes,Online,http://ClinicalTrials.gov,N/A,N/A,N/A,No,No,N/A,No,N/A,N/A,N/A,N/A
03/11/2021,2021,10.1002/nop2.1112,"Neoplasms, Nurses, Nursing Care",Missing,data availability statement researchers allow this article to be used by anyone interested. all data generated during this study are included in this published article.,Method,Yes,No,N/A,N/A,N/A,N/A,N/A,No,No,N/A,No,N/A,N/A,N/A,N/A
15/1/2019,2019,10.1002/brb3.1209,"Brain, Depressive Disorder, Major, Religion, Spirituality",Missing,N/A,Method,Yes,No,N/A,N/A,N/A,N/A,Method,Yes,No,N/A,No,N/A,N/A,N/A,N/A
09/11/2020,2020,10.3390/genes11111325,"Electron Transport Complex I, Leigh Disease",Missing,N/A,Method,Yes,No,N/A,N/A,N/A,N/A,Fulltext,Yes,No,N/A,No,N/A,N/A,N/A,N/A
20/10/2021,2021,10.1186/s12199-021-01028-x,"Frailty, Resistance Training, Social Participation",Missing,"availability of data and materials the data that support the findings of this study are available from the corresponding author, but restrictions apply to the availability of these data, which were used under license for the current study, and so are not publicly available. however, data are available from the authors upon reasonable request and with permission of the ethics committee of the university of hyogo. all authors had full access to the study data in the research room of ch, university of hyogo.",Method,Yes,Yes,Online,N/A,N/A,N/A,DA|Method|Fulltext,Yes,Yes,Online,No,N/A,N/A,N/A,N/A
28/4/2022,2022,10.3390/ijerph19095379,"Antirheumatic Agents, Arthritis, Rheumatoid, Mobile Applications",Missing,data availability statement not applicable.,Method,Yes,Yes,Online,"https://www.mdpi.com/article/10.3390/ijerph19095379/s1, 10.3390/ijerph19095379/s1",N/A,N/A,Method,Yes,No,N/A,No,N/A,N/A,N/A,N/A
18/6/2020,2020,10.1002/brb3.1726,"Peptide Fragments, Proteins, Reperfusion Injury",Missing,data availability statement the data that support the findings of this study are available from the corresponding author upon reasonable request.,Method,Yes,No,N/A,N/A,N/A,N/A,Method|Fulltext,Yes,No,N/A,No,N/A,N/A,N/A,N/A
29/10/2021,2021,10.3390/nu13113879,"Critical Care, Respiration, Artificial",Missing,data availability statement the data presented in this study are available on request from the corresponding author. the data are not publicly available due to hospital policy.,Method,Yes,No,N/A,N/A,N/A,N/A,N/A,No,No,N/A,No,N/A,N/A,N/A,N/A
29/9/2021,2021,10.1093/database/baab059,"Amino Acid Substitution, Antigens, Viral, Epitopes, Internet, Metadata, SARS-CoV-2, Search Engine, Software",Missing,"data access optimization several optimization steps were designed for allowing acceptable query performances. as the most critical part of the system involves data on sars-cov-2 virus and a human host, the data on epitopes and matching variants regarding this fraction of the database have been precalculated into several materialized views, one for each of the 12 distinct proteins in the system (i.e. orf1a, orf1ab, spike, orf3a, e, m, orf6, orf7a, orf7b, orf8, n and orf10) and 16 sub-proteins (from nsp1 to nsp16).|data availability the code of episurf is available on github at  https://github.com/deib-geco/episurf/  and on zenodo at  http://doi.org/10.5281/zenodo.5121287 . the system is documented in the related wiki at  https://github.com/deib-geco/episurf/wiki/ .",Method,Yes,Yes,Online,"http://tools.iedb.org/main/analysis-tools/, https://github.com/deib-geco/episurf/wiki/, http://gmql.eu/virusviz/, 10.5281/zenodo.5121287, https://github.com/deib-geco/episurf/, http://doi.org/10.5281/zenodo.5121287, http://tools.iedb.org/main/",N/A,"Github, Zenodo, tools.iedb.org",DA|Method,Yes,Yes,Online,Yes,10.1101/2021.07.12.452076,2021/07/13,http://dx.doi.org/10.1101/2021.07.12.452076,bioRxiv
26/5/2021,2021,10.3390/ijms22115675,"Docosahexaenoic Acids, Hepatocytes, MAP Kinase Signaling System, Mitochondria, Liver, Mitophagy, Receptors, G-Protein-Coupled",Missing,data availability statement data is contained within the article.,Method,Yes,No,N/A,N/A,N/A,N/A,N/A,No,No,N/A,No,N/A,N/A,N/A,N/A
9/7/2020,2020,10.1038/s41598-020-67835-4,"Clinical Deterioration, Wireless Technology",Missing,"data collection data was prospectively collected on patient recruitment, demographics, and clinical outcomes. the quantity, quality and accuracy of physiological data were measured throughout the study. to calculate valid clinical data we applied broad filters for each parameter to exclude technical noise. data was excluded if values were outside the ranges of: hr < 20/min or hr > 300/min, rr < 5/min or rr > 200/min and spo 2  < 30%. in the absence of a standard for wireless monitoring we chose duration of intended monitoring time with clinically relevant data. we chose the usual 24 h and a longer exploratory 72 h window for identification of deterioration.",Method,Yes,No,N/A,N/A,N/A,N/A,N/A,No,No,N/A,Yes,10.21203/rs.3.pex-1128/v1,2020/09/24,http://dx.doi.org/10.21203/rs.3.pex-1128/v1,Research Square
26/9/2020,2020,10.1002/acn3.51205,"Cerebral Cortex, Spasms, Infantile",Missing,N/A,Method,Yes,No,N/A,N/A,N/A,N/A,Method,Yes,No,N/A,No,N/A,N/A,N/A,N/A
23/6/2021,2021,10.1038/s41598-021-92654-6,"Platelet Activation, Platelet Aggregation Inhibitors, Thrombosis, cdc42 GTP-Binding Protein",Missing,N/A,Method,Yes,No,N/A,N/A,N/A,N/A,Method|Fulltext,Yes,No,N/A,No,N/A,N/A,N/A,N/A
8/3/2022,2022,10.1186/s12920-022-01207-x,"Carcinoma, Hepatocellular, Liver Neoplasms",Missing,"availability of data and materials publicly available datasets were analyzed in this study. the data analyzed in this study are available on the cancer genome atlas database ( https://portal.gdc.cancer.gov/ ), gene expression omnibus database ( https://www.ncbi.nlm.nih.gov/geo/ ), ucsc xena database ( www.xena.ucsc.edu ), and the cancer immunome atlas ( https://tcia.at ).",Method,Yes,Yes,Online,"www.xena.ucsc.edu, https://tcia.at, https://portal.gdc.cancer.gov/, https://www.ncbi.nlm.nih.gov/geo/",N/A,Gene Expression Omnibus,DA|Method|Fulltext,Yes,Yes,Online,No,N/A,N/A,N/A,N/A
04/09/2020,2020,10.3390/ijerph17186449,"Artificial Intelligence, Support Vector Machine",Missing,N/A,Method,Yes,No,N/A,N/A,N/A,N/A,Method|Fulltext,Yes,No,N/A,No,N/A,N/A,N/A,N/A
31/7/2020,2020,10.1186/s12913-020-05568-w,"Delivery of Health Care, HIV Infections, Pre-Exposure Prophylaxis",Missing,"availability of data and materials all data generated or analysed during this study are included in this published article, or in primary research articles to which references were made. additional data are available in the supplementary files listed below:",Method,Yes,Yes,Online,N/A,N/A,N/A,N/A,No,No,N/A,Yes,10.21203/rs.3.rs-28271/v2,2020/07/20,http://dx.doi.org/10.21203/rs.3.rs-28271/v2,Research Square
30/6/2021,2021,10.1186/s40168-021-01070-5,"Microbiota, Space Flight",Missing,availability of data and materials all data generated or analyzed during this study are included in this published article and its supplementary information files. sequences are deposited at ena database under the accession erp119217.,Method,Yes,Yes,Online,N/A,ERP119217,ENA or EBI Sequence Read Archive,Method,Yes,No,N/A,Yes,10.1101/2020.04.08.031401,2020/04/09,http://dx.doi.org/10.1101/2020.04.08.031401,bioRxiv
9/12/2020,2020,10.1186/s12889-020-09919-4,"Electronic Nicotine Delivery Systems, Homeless Persons, Tobacco Products, Vaping",Missing,availability of data and materials the datasets analyzed during the current study are not publicly available. the authors had access to the data through a data use agreement with the wilder foundation. any reasonable request for the data underlying these analyses will be considered in consultation with the wilder foundation.,Method,Yes,Yes,Online,http://mnhomeless.org/,N/A,N/A,N/A,No,No,N/A,No,N/A,N/A,N/A,N/A
22/12/2021,2021,10.3390/cells11010012,"Disease Progression, Heme Oxygenase-1, Kelch-Like ECH-Associated Protein 1, NF-E2-Related Factor 2, Tumor Hypoxia",Missing,data availability statement the data presented in this study are available on request from the corresponding author.,Method,Yes,Yes,Online,"https://www.mdpi.com/article/10.3390/cells11010012/s1, 10.3390/cells11010012/s1",N/A,N/A,N/A,No,No,N/A,No,N/A,N/A,N/A,N/A
04/10/2019,2019,10.15252/embr.201948896,Host-Parasite Interactions,Missing,data availability all imaging data and genetic material used for this paper are available from the authors on reasonable request.,Method,Yes,No,N/A,N/A,N/A,N/A,Method|Fulltext,Yes,No,N/A,Yes,10.1101/646463,2019/05/23,http://dx.doi.org/10.1101/646463,bioRxiv
18/6/2021,2021,10.1038/s41598-021-92207-x,"Health Expenditures, Healthcare Disparities, Mouth Neoplasms, Oropharyngeal Neoplasms",Missing,N/A,Method,Yes,No,N/A,N/A,N/A,N/A,N/A,No,No,N/A,No,N/A,N/A,N/A,N/A
24/6/2019,2019,10.1038/s41467-019-10630-1,"Genetic Predisposition to Disease, Genome-Wide Association Study",Missing,"data availability genome-wide summary statistics of the analyses have been deposited in an online repository and are available at:  https://data.bris.ac.uk/data/dataset/2j2rqgzedxlq02oqbb4vmycnc2 . genome-wide summary statistics for all metabolic and cardiovascular outcomes used in this analysis were downloaded from the sources listed in supplementary note  1 . genome-wide summary statistics are available for the cohra and drdr projects’ dental caries gwas through the human genomics analysis interface of the facebase consortium ( http://facebase.sdmgenetics.pitt.edu/ , nih grant # 5u01-de024425). participant-level genomic and phenotypic data for the cohra and drdr projects are available through dbgap ( https://www.ncbi.nlm.nih.gov/gap/ ; dbgap study accession #: phs000095.v3.p1). access to ukbiobank data is through a manged open access procedure which is described in full online ( http://www.ukbiobank.ac.uk/using-the-resource/ ). the data underlying fig.  1a  are provided in supplementary table  17 , and the data underlying fig.  1b  are provided in supplementary table  18 . source data for figs  3  and  4  are provided in supplementary tables  9  and  10 .",Method,Yes,Yes,Supplementary Information|Online,"https://www.ncbi.nlm.nih.gov/gap/, https://data.bris.ac.uk/data/dataset/2j2rqgzedxlq02oqbb4vmycnc2, http://facebase.sdmgenetics.pitt.edu/, http://www.ukbiobank.ac.uk/using-the-resource/",N/A,"University of Bristol, UK Biobank, ncbi.nlm.nih.gov",Method|Fulltext,Yes,No,N/A,No,N/A,N/A,N/A,N/A
23/6/2019,2019,10.1017/S1463423619000422,"Delivery of Health Care, Health Care Reform, Patient Acceptance of Health Care, Patient Satisfaction, Primary Health Care, Urban Population",Missing,N/A,Method,Yes,No,N/A,N/A,N/A,N/A,N/A,No,No,N/A,No,N/A,N/A,N/A,N/A
1/12/2020,2020,10.1186/s12974-020-02031-9,"Hypoxia-Ischemia, Brain, Microglia, NF-kappa B",Missing,availability of data and materials the datasets used and/or analyzed during the current study are available from the corresponding author on reasonable request.,Method,Yes,No,N/A,N/A,N/A,N/A,N/A,No,No,N/A,No,N/A,N/A,N/A,N/A
10/3/2021,2021,10.1038/s41598-021-84074-3,"Anthropogenic Effects, Birds, Forests, Models, Biological, Nesting Behavior, Seasons",Missing,"data availability the hornbill data that support the findings of this study are available at 14 , 27 .|code availability requests related to the numerical modelling code associated with this paper should be sent to the authors.",Method,Yes,Yes,Online,N/A,N/A,N/A,DA|Method|Fulltext,Yes,Yes,Online,No,N/A,N/A,N/A,N/A
31/5/2019,2019,10.3390/ijms20112696,"Anti-Bacterial Agents, Biopolymers, Methacrylates, Polymerization, Quaternary Ammonium Compounds, Ultraviolet Rays",Missing,N/A,Method,Yes,No,N/A,N/A,N/A,N/A,N/A,No,No,N/A,No,N/A,N/A,N/A,N/A
11/8/2020,2020,10.1186/s12916-020-01676-w,"Fertility, Infant, Small for Gestational Age, Pregnancy Outcome",Missing,"availability of data and materials the data that support the findings of this study are available from the norwegian institute of public health  https://www.fhi.no/en/studies/moba/for-forskere-artikler/research-and-data-access/  but restrictions apply to the availability of these data, which were used under license for the current study, and so are not publicly available. data are however available from the authors upon reasonable request and with permission of the norwegian institute of public health.",Method,Yes,Yes,Online,https://www.fhi.no/en/studies/moba/for-forskere-artikler/research-and-data-access/,N/A,Folkehelseinstituttet (Norwegian Institute of Public Health),N/A,No,No,N/A,No,N/A,N/A,N/A,N/A
23/9/2021,2021,10.1186/s12866-021-02302-2,"Dermatitis, Atopic, Dysbiosis, Microbiota, Skin, Staphylococcal Infections",Missing,availability of data and materials the sequencing datasets generated and analysed during the study are not publicly available due to privacy of the participants but are available from the corresponding author upon reasonable request.,Method,Yes,Yes,Online,N/A,N/A,N/A,Method,Yes,No,N/A,No,N/A,N/A,N/A,N/A
25/11/2020,2020,10.1186/s12889-020-09933-6,None,Missing,"availability of data and materials the data that support the findings of this study are available from the health commission of shaanxi province; however, restrictions apply regarding the availability of these data, which were used under a license for the current study, and the data are not publicly available. the data may available from the authors upon reasonable request and with permission from the health commission of shaanxi province. please contact the corresponding author: c li: 397564825@qq.com.",Method,Yes,No,N/A,N/A,N/A,N/A,N/A,No,No,N/A,Yes,10.21203/rs.3.rs-34383/v5,2020/11/20,http://dx.doi.org/10.21203/rs.3.rs-34383/v5,Research Square
22/1/2021,2021,10.1038/s41598-021-81475-2,"Colorectal Neoplasms, Dual Oxidases, Gene Expression Regulation, Neoplastic, Lithostathine, Organoids",Missing,N/A,Method,Yes,No,N/A,N/A,N/A,N/A,N/A,No,No,N/A,Yes,10.21203/rs.3.rs-107047/v1,2020/11/24,http://dx.doi.org/10.21203/rs.3.rs-107047/v1,Research Square
6/2/2019,2019,10.1186/s40249-019-0521-0,"Models, Biological, Molluscacides, Pest Control, Schistosomiasis, Snails",Missing,availability of data and materials not applicable.,Method,Yes,Yes,Online,N/A,N/A,N/A,N/A,No,No,N/A,No,N/A,N/A,N/A,N/A
07/04/2020,2020,10.1016/j.celrep.2020.03.063,"High-Throughput Nucleotide Sequencing, Sequence Analysis, RNA, Single-Cell Analysis",Missing,"lead contact and materials availability further information and requests for resources and reagents should be directed to and will be fulfilled by the lead contact, martin prlic, at  mprlic@fredhutch.org . this study did not generate new unique reagents.|data and code availability the sequencing data discussed in this publication have been deposited in the ncbi’s gene expression omnibus ( edgar et al., 2002 ) and are accessible through geo series accession number geo: gse135325. ( https://www.ncbi.nlm.nih.gov/geo/query/acc.cgi?acc=gse135325 ). the accession number for all flow cytometry data reported in this paper is flowrepository: fr-fcm-z266 ( http://flowrepository.org/id/fr-fcm-z266 ). all scripts used for data processing and plot generation are available at  https://github.com/mairflo/targeted_transcriptomics .",Method,Yes,Yes,Online,"http://flowrepository.org/id/fr-fcm-z266, https://github.com/mairflo/targeted_transcriptomics, https://www.ncbi.nlm.nih.gov/geo/query/acc.cgi?acc=gse135325","GSE135325, FR-FCM-Z266","FlowRepository, Github, Gene Expression Omnibus ,  Gene Expression Omnibus, FlowRepository",DA|Method|Fulltext,Yes,Yes,Online,Yes,10.1101/700534,2019/07/14,http://dx.doi.org/10.1101/700534,bioRxiv
8/7/2021,2021,10.1038/s41598-021-93584-z,"Hepatitis B virus, NIMA-Interacting Peptidylprolyl Isomerase, Trans-Activators, Transcriptional Activation, Viral Regulatory and Accessory Proteins, Virus Replication",Missing,N/A,Method,Yes,No,N/A,https://david.ncifcrf.gov/home.jsp,N/A,N/A,Method,Yes,No,N/A,No,N/A,N/A,N/A,N/A
03/01/2020,2020,10.1016/S2352-3018(19)30322-4,None,Missing,"data sharing de-identified individual participant data that underlie the results reported in this article (text, tables, figures, and appendices) will be shared upon request. the data dictionary and study protocol are also available. data will be available from 9 months after publication. researchers who wish to use the data to address any specific questions not directly addressed under the study objectives and that the data would lend itself to and who provide a methodologically sound proposal that has been approved by an independent review committee can request the data. proposals should be directed to  nunesm@rmpru.co.za  or  madhis@rmpru.co.za . to gain access, data requestors will need to sign a data access agreement and any transfer of data will be governed by the terms of the local ethics committee. data sharing will be done on a collaborative basis, with the study principal investigator (or their nominee) being included in any further interrogation of the data. the data will be provided in the format in which it has been entered at respiratory and meningeal pathogens research unit with the necessary data dictionary.",Method,Yes,No,N/A,N/A,N/A,N/A,Method,Yes,No,N/A,No,N/A,N/A,N/A,N/A
31/10/2019,2019,10.3390/biom9110677,"Immunity, Innate, Signal Transduction, Simuliidae, Toll-Like Receptors",Missing,N/A,Method,Yes,No,N/A,N/A,N/A,N/A,N/A,No,No,N/A,No,N/A,N/A,N/A,N/A
2/11/2020,2020,10.1038/s41598-020-76008-2,"Fatigue, Muscle Contraction, Running, Torque",Missing,N/A,Method,Yes,No,N/A,N/A,N/A,N/A,Method|Fulltext,Yes,No,N/A,No,N/A,N/A,N/A,N/A
03/04/2019,2019,10.3390/molecules24071306,"Endocannabinoids, Hippocampus, Long-Term Potentiation, Receptor, Cannabinoid, CB1, Somatostatin",Missing,N/A,Method,Yes,No,N/A,N/A,N/A,N/A,N/A,No,No,N/A,No,N/A,N/A,N/A,N/A
17/7/2020,2020,10.1038/s41598-020-68926-y,"Choice Behavior, Cues, Perception, Sensory Thresholds",Missing,data availability data and code used for statistical analysis are available at this link:  https://osf.io/fvmzw .,Method,Yes,Yes,Online,https://osf.io/fvmzw,N/A,Open Science Framework,DA|Method,Yes,Yes,Online,No,N/A,N/A,N/A,N/A
25/2/2021,2021,10.1186/s12879-021-05907-0,"HIV Testing, Information Seeking Behavior, Internet, Pre-Exposure Prophylaxis",Missing,availability of data and materials all data is publically available through google trends and through the behavioral risk factor surveillance system ( brfss ).,Method,Yes,No,N/A,N/A,N/A,N/A,N/A,No,No,N/A,Yes,10.21203/rs.3.rs-92816/v1,2020/10/20,http://dx.doi.org/10.21203/rs.3.rs-92816/v1,Research Square
5/2/2021,2021,10.1038/s41522-020-00172-6,"Polymyxin B, Single Molecule Imaging",Missing,data availability data generated and analysed during this study are included in this published article and its supplemental information file. additional details are available upon reasonable request.,Method,Yes,Yes,Online,N/A,N/A,N/A,N/A,No,No,N/A,No,N/A,N/A,N/A,N/A
21/1/2021,2021,10.1186/s12916-020-01893-3,"COVID-19, Early Warning Score",Missing,"availability of data and materials code and pre-trained models are available at  https://github.com/ewancarr/news2-covid-19  and openly shared for testing in other covid-19 datasets. source text from patient records used at all sites in the study will not be available due to inability to safely fully anonymise up to the information commissioner office (ico) standards and would be likely to contain strong identifiers (e.g. names, postcodes) and highly sensitive data (e.g. diagnoses). a subset of the kch dataset limited to anonymisable information (e.g. only snomed codes and aggregated demographics) is available on request to researchers with suitable training in information governance and human confidentiality protocols subject to approval by the king’s college hospital information governance committee; applications for research access should be sent to kch-tr.cogstackrequests@nhs.net. this dataset cannot be released publicly due to the risk of re-identification of such granular individual-level data, as determined by the king’s college hospital caldicott guardian. the gstt dataset cannot be released publicly due to the risk of re-identification of such granular individual-level data, as determined by the guy’s and st thomas’s trust caldicott guardian. the uhs dataset cannot be released publicly due to the risk of re-identification of such granular individual-level data, as determined by the university hospital southampton caldicott guardian. the uch data cannot be released publicly due to conditions of regulatory approvals that preclude open access data sharing to minimise the risk of patient identification through granular individual health record data. the authors will consider specific requests for data sharing as part of academic collaborations subject to ethical approval and data transfer agreements in accordance with the gdpr regulations. the wuhan dataset used in the study will not be available due to the inability to fully anonymise in line with ethical requirements. applications for research access should be sent to ts and details will be made available via  https://covid.datahelps.life/prediction/ . the ouh dataset cannot be released publicly due to the risk of re-identification of such granular individual-level data.",Method,Yes,Yes,Online,"https://github.com/ewancarr/news2-covid-19, https://covid.datahelps.life/prediction/",N/A,Github,DA|Method,Yes,Yes,Online,Yes,10.1101/2020.04.24.20078006,2020/04/29,http://dx.doi.org/10.1101/2020.04.24.20078006,medRxiv
21/6/2020,2020,10.1136/bmjgh-2019-002187,Tuberculosis,United Kingdom,"data a simple random sample of one million individuals from the nhird between 1996 and 2000 was linked to data beyond this period on individual characteristics (age and sex), healthcare records and healthcare facilities visited. 18  the main reason for clinical visits and clinicians’ diagnoses on prescription are recorded in the nhird using the international classification of diseases, ninth revision, clinical modification (icd-9-cm). the nhird was provided by the nhi administration, ministry of health and welfare and managed by national health research institutes (registered number 100290). the interpretation and conclusions contained herein do not represent those of the nhi administration, ministry of health and welfare or national health research institutes.",Method,Yes,Yes,N/A,N/A,N/A,N/A,Method,Yes,No,N/A,Yes,10.1101/2021.03.17.21253823,2021/04/04,http://dx.doi.org/10.1101/2021.03.17.21253823,medRxiv
9/10/2020,2020,10.1186/s12879-020-05454-0,"Cholera, Cryptosporidiosis, Cryptosporidium, Diarrhea, Disease Outbreaks, Enterotoxigenic Escherichia coli, Escherichia coli Infections, Vibrio cholerae",Missing,availability of data and materials all data generated and analyzed during this study are included in the published manuscript and supplementary information files.,Method,Yes,Yes,Online,N/A,N/A,N/A,N/A,No,No,N/A,No,N/A,N/A,N/A,N/A
3/9/2020,2020,10.1186/s12936-020-03374-7,"Cross-Sectional Studies, Malaria, Falciparum, Malaria, Vivax, Reverse Transcriptase Polymerase Chain Reaction",Missing,availability of data and materials all data presented in this article or accompanying additional files can be made available upon request.,Method,Yes,Yes,Online,N/A,N/A,N/A,N/A,No,No,N/A,Yes,10.21203/rs.3.rs-25965/v3,2020/08/13,http://dx.doi.org/10.21203/rs.3.rs-25965/v3,Research Square
20/3/2019,2019,10.1186/s12870-019-1721-2,"Ammonium Compounds, Dehydration, Nitric Oxide",Missing,availability of data and materials all data generated or analysed during this study are included in this published article (and its supplementary information files).,Method,Yes,Yes,Online,N/A,N/A,N/A,N/A,No,No,N/A,No,N/A,N/A,N/A,N/A
26/5/2021,2021,10.1038/s41598-021-90527-6,"Anilides, Carbamates, Epithelial Cells, Histone Deacetylase Inhibitors, Hydroxamic Acids, Indoles, Oxazoles, Transcription, Genetic, Triple Negative Breast Neoplasms",Missing,data availability the datasets generated in the current study are available in the gene expression omnibus (geo) database ( https://www.ncbi.nlm.nih.gov/geo/ ).,Method,Yes,Yes,Online,https://www.ncbi.nlm.nih.gov/geo/,N/A,Gene Expression Omnibus,Method|Fulltext,Yes,No,N/A,Yes,10.21203/rs.3.rs-116022/v1,2020/12/01,http://dx.doi.org/10.21203/rs.3.rs-116022/v1,Research Square
15/2/2021,2021,10.20892/j.issn.2095-3941.2020.0186,"Carcinoma, Renal Cell, Cyclin-Dependent Kinase 2, Flavones, Kidney Neoplasms, Piperazines, Pyridines, S-Phase Kinase-Associated Proteins",Missing,N/A,Method,Yes,No,N/A,N/A,N/A,N/A,N/A,No,No,N/A,Yes,10.21203/rs.3.rs-19110/v1,2020/04/10,http://dx.doi.org/10.21203/rs.3.rs-19110/v1,Research Square
19/6/2020,2020,10.1155/2020/7132072,"Accidents, Causality, Chemical Industry, Neural Networks, Computer",Missing,data availability the data used to support the findings of this study are available from the corresponding author upon request.,N/A,No,No,N/A,N/A,N/A,N/A,Fulltext,Yes,No,N/A,No,N/A,N/A,N/A,N/A
30/8/2021,2021,10.1167/tvst.10.9.37,"Pseudotumor Cerebri, Visual Fields",Missing,N/A,Method,Yes,No,N/A,N/A,N/A,N/A,Method,Yes,No,N/A,No,N/A,N/A,N/A,N/A
28/9/2019,2019,10.3390/toxins11100568,"Anopheles, Pichia",Missing,N/A,Method,Yes,Yes,Online,"http://www.cbs.dtu.dk/services/NetNGlyc/, https://www.mdpi.com/2072-6651/11/10/568/s1",N/A,N/A,Method,Yes,No,N/A,No,N/A,N/A,N/A,N/A
7/2/2020,2020,10.1590/s0102-865020190120000002,"Angiogenesis Inducing Agents, Caryophyllaceae, Wound Healing",Missing,N/A,Method,Yes,No,N/A,N/A,N/A,N/A,N/A,No,No,N/A,No,N/A,N/A,N/A,N/A
23/7/2020,2020,10.1186/s12889-020-09266-4,"Caregiver Burden, Caregivers, Disabled Persons",Missing,availability of data and materials the datasets used and/or analyzed during the current study are available from the corresponding author on reasonable request.,Method,Yes,No,N/A,N/A,N/A,N/A,N/A,No,No,N/A,No,N/A,N/A,N/A,N/A
27/5/2019,2019,10.6061/clinics/2019/e722,"Clinical Competence, Delphi Technique, Evidence-Based Medicine",Missing,N/A,N/A,No,No,N/A,N/A,N/A,N/A,N/A,No,No,N/A,No,N/A,N/A,N/A,N/A
22/11/2021,2021,10.1186/s12911-021-01688-3,"Machine Learning, Vaccine Efficacy",Missing,availability of data and materials all the source data and code are available at  https://atlas.scharp.org/cpas/project/hvtn%20public%20data/hvtn%20505/begin.view  and  https://github.com/shan-stat/rf_hvtn505,Method,Yes,Yes,Online,"https://github.com/shan-stat/rf_hvtn505, https://atlas.scharp.org/cpas/project/hvtn%20public%20data/hvtn%20505/begin.view",N/A,Github,DA|Method|Fulltext,Yes,Yes,Online,No,N/A,N/A,N/A,N/A
30/9/2020,2020,10.1038/s41598-020-73408-2,"Asthma, Breath Tests, Exhalation, Inflammation, Phenotype",Missing,data availability the data described in the manuscript are available on reasonable request to the corresponding author.,Method,Yes,Yes,Online,N/A,N/A,N/A,Method|Fulltext,Yes,No,N/A,No,N/A,N/A,N/A,N/A
23/7/2021,2021,10.1111/irv.12881,"COVID-19, Influenza, Human, Respiratory Syncytial Virus Infections, Respiratory Syncytial Virus, Human",Missing,"data availability statement the study protocol including informed consent forms is available on the nicd website ( https://www.nicd.ac.za/wp-content/uploads/2021/02/phirst-sars-cov-2-protocol-v1-amendment-nov2020-incl-upd-consent.pdf ). analysis of the data for primary study objectives is planned to be completed by december 2023. additional modelling and serologic studies will be concluded within one additional year, and primary de‐identified data will be made publicly available not later than december 2025. the investigators welcome enquiries about possible collaborations and requests for access to the data set. data will be shared after approval of a proposal and with a signed data access agreement. investigators interested in more details about this study, or in accessing these resources, should contact the principle investigator, prof cheryl cohen, at nicd ( cherylc@nicd.ac.za ).",N/A,No,Yes,Online,"https://www.nicd.ac.za/wp-content/uploads/2021/02/phirst-sars-cov-2-protocol-v1-amendment-nov2020-incl-upd-consent.pdf, http://www.sociopatterns.org, https://publons.com/publon/10.1111/irv.12881, http://clinicaltrials.gov, http://www.internationalreagentresource.org",N/A,N/A,Fulltext,Yes,No,N/A,Yes,10.1101/2021.01.06.21249313,2021/01/13,http://dx.doi.org/10.1101/2021.01.06.21249313,medRxiv
19/12/2020,2020,10.3390/ijerph17249535,"Depression, Diabetes Mellitus, Frail Elderly, Frailty, Quality of Life",Missing,"3.1. sampling and data availability from a total of 1035 irish participants, 1007 were aged ≥50 years and 970 (96%) had sufficient data for frailty (≤2 missing items [ 13 ]) and no missing data for other variables of interest (diabetes status, casp-12, 12 euro-d items and self-rated health). descriptive statistics of participants according to their diabetes and frailty status are presented in  table 1 .",Method,Yes,No,N/A,N/A,N/A,N/A,Method|Fulltext,Yes,No,N/A,No,N/A,N/A,N/A,N/A
24/3/2022,2022,10.1186/s12877-022-02951-6,"Accidents, Traffic, Automobile Driving",Missing,availability of data and materials r-code generated and/or used during the current study is available on osf (see  https://osf.io/fk4v2/ ). data sets are available upon request.,Method,Yes,Yes,Online,https://osf.io/fk4v2/,N/A,Open Science Framework,DA|Method|Fulltext,Yes,Yes,Online,No,N/A,N/A,N/A,N/A
27/10/2020,2020,10.3390/v12111218,"Bees, Metagenomics, Virology, Viruses",Missing,"2.7. data accessibility sequencing data have been deposited in the sra database (ncbi) under bioproject accession number prjna559070 and biosample accession number samn12512743- samn12512752. la jolla virus (ljv), kilifi virus (kiv), and thika virus (thv) near-complete genome sequences were deposited in genbank under accession numbers mt681680, mt681681, and mt681679, respectively. a multifasta file of the sequences retrieved in this study and used in the phylogenies of the known honey bee viruses is provided as a  supplementary file .",Method,Yes,Yes,Online,"https://www.mdpi.com/1999-4915/12/11/1218/s1, http://www.microbe.tv/twiv/twiv-271-to-bee-or-not-to-bee-that-is-the-infection/","SAMN12512752, SAMN12512743, PRJNA559070","NCBI Bioproject, NCBI Biosample",Method,Yes,No,N/A,No,N/A,N/A,N/A,N/A
16/10/2019,2019,10.1186/s12886-019-1208-9,"Angiogenesis Inhibitors, Retinal Diseases, Visual Acuity",Missing,"assessing the availability and completeness of the data collected the variables and outcomes of interest included in the qualitative assessment were defined based on the recommendations made by the international consortium for health outcomes measurement (ichom) for macular degeneration (outlined by rodrigues et al. 2016) [ 23 ]. the outcomes of interest were grouped into 7 categories: patient baseline status (patient characteristics and baseline disease information); clinical outcomes; patient treatment and management, including laboratory assessments; anti-vegf therapy status (naïve or experienced); safety outcomes; patient-reported burden; and economic burden.|supplementary searches for each data source for each data source, information from identified publications was supplemented by additional internet searches for supporting resources, such as websites and published factsheets. this approach was particularly useful for gathering data source contact details and general information.|availability of data and materials not applicable.",Method,Yes,Yes,Online,N/A,N/A,N/A,N/A,No,Yes,Online,No,N/A,N/A,N/A,N/A
15/3/2021,2021,10.3758/s13414-021-02243-y,"Space Perception, Spatial Memory",Missing,N/A,Method,Yes,No,N/A,N/A,N/A,N/A,Method|Fulltext,Yes,No,N/A,Yes,10.1101/2021.05.29.446288,2021/05/31,http://dx.doi.org/10.1101/2021.05.29.446288,bioRxiv
22/2/2019,2019,10.1186/s12958-019-0469-8,"Contraception, Desogestrel, Levonorgestrel, Medroxyprogesterone Acetate",Missing,availability of data and materials the datasets used and/or analysed during the current study are available from the corresponding author on reasonable request.,Method,Yes,Yes,Online,N/A,N/A,N/A,N/A,No,No,N/A,No,N/A,N/A,N/A,N/A
21/4/2021,2021,10.3390/cells10050976,"Carcinoma, Hepatocellular, Glycogen, Hepatocytes, Liver Cirrhosis, Liver Neoplasms",Missing,data availability statement not applicable.,Method,Yes,No,N/A,N/A,N/A,N/A,N/A,No,No,N/A,No,N/A,N/A,N/A,N/A
13/8/2020,2020,10.1038/s41467-020-17882-2,"Endoplasmic Reticulum, Leukemia, Myeloid, Acute",Missing,source data source data|data availability transcriptome profiling assays on molm14 and u937 treated or not with 10 mm metformin in independent triplicates. geo:  gse97346 .  source data  are provided with this paper for figs.  1 – 6  and supplementary figs.  1 – 8 . raw data are available on reasonable request.,Method,Yes,Yes,Online,N/A,GSE97346,Gene Expression Omnibus,Method|Fulltext,Yes,No,N/A,No,N/A,N/A,N/A,N/A
23/12/2020,2020,10.1080/17290376.2020.1857300,"Blacks, Health Knowledge, Attitudes, Practice, Health Surveys, Social Stigma",Missing,data availability statement the data can be available from the corresponding author and dhs database.,Method,Yes,No,N/A,N/A,N/A,N/A,N/A,No,No,N/A,Yes,10.21203/rs.2.9217/v1,2019/04/17,http://dx.doi.org/10.21203/rs.2.9217/v1,Research Square
13/9/2019,2019,10.1038/s41467-019-12125-5,Mutation,Missing,"data availability all raw genomic data was deposited to geo under accession number  gse113909 . the source data underlying figs.  1 b, h,  2 b, f, h,  4 b,  5b  and supplementary figs.  4b, f, g  and the full-size images of immunoblots depicted in figs.  4d, e, f ,  5a, j, k  and supplementary fig.  3a  are included in the source data file. detailed protocols and reagents described in this manuscript are available from the corresponding author upon request.",Method,Yes,Yes,Supplementary Information|Online,N/A,GSE113909,Gene Expression Omnibus,Method|Fulltext,Yes,No,N/A,No,N/A,N/A,N/A,N/A
18/10/2020,2020,10.1111/jeb.13713,"Biological Evolution, Ranidae, Vocalization, Animal",Missing,data availability statement data will be made available on dryad upon acceptance  https://doi.org/10.5061/dryad.3tx95x6ds .,Method,Yes,Yes,Online,"10.5061/dryad.3tx95x6ds, https://publons.com/publon/10.1111/jeb.13713, https://doi.org/10.5061/dryad.3tx95x6ds",N/A,Dryad Digital Repository,Fulltext,Yes,No,N/A,Yes,10.1101/2020.04.18.047936,2020/04/20,http://dx.doi.org/10.1101/2020.04.18.047936,bioRxiv
11/11/2019,2019,10.1155/2019/4512501,Gait Analysis,Missing,data availability the motion and force data used to support the findings of this study are available from the corresponding author upon reasonable request.,Method,Yes,No,N/A,N/A,N/A,N/A,Method|Fulltext,Yes,No,N/A,No,N/A,N/A,N/A,N/A
12/12/2019,2019,10.1038/s41598-019-55273-w,"Animal Migration, Ecosystem, Genetics, Population, Wolves",Missing,"data availability upon acceptance of the manuscript, wolf microsatellite genotypes used in the final analyses will be deposited at dryad digital repository.",Method,Yes,Yes,Online,N/A,N/A,N/A,Method|Fulltext,Yes,No,N/A,No,N/A,N/A,N/A,N/A
30/6/2021,2021,10.3390/genes12071011,"Ascomycota, Chromosomal Instability, Host-Pathogen Interactions, Plant Diseases, Virulence",Missing,data availability statement the data presented in this study are available in the  supplementary material .,Method,Yes,Yes,Online,"https://www.mdpi.com/article/10.3390/genes12071011/s1, 10.3390/genes12071011/s1",N/A,N/A,Method,Yes,No,N/A,Yes,10.1101/595454,2019/04/01,http://dx.doi.org/10.1101/595454,bioRxiv
10/6/2019,2019,10.1186/s13071-019-3546-0,"Chagas Disease, Culture, Health Knowledge, Attitudes, Practice, Population Groups, Triatoma",Missing,"study design and ethnographical data collection ethnographic fieldwork by means of structured and semi-structured interviews provided a basis for the quantitative study. a structured questionnaire was designed to assess the cultural perception of cd and its  triatoma  spp. vectors among the selected groups of the bolivian population (guaraní, quechua, ayoreo and chiquitano indigenous peoples and residents of the cities la paz and santa cruz). it consisted of three major themes: (i) socio-demographic characteristics; (ii) knowledge and perception of triatomine vectors (local names, presence, perceived dangerousness); and (iii) awareness of cd (knowledge, direct experience or indirect through affected relatives, modes of transmission of the disease, sources of information). questions related to knowledge of triatomine bugs were asked prior to the questions concerning cd in order to avoid bias. a total of 480 people between 10 and 80 years-old were interviewed. informants were selected consecutively in order of appearance, each representing a different family and according to the prior informed consent, availability and willingness of the informants. a minimum of 50 interviews was carried out for each ethnic group or respectively city. for each visited community, a minimum of 10 representative interviews were conducted with local informants and corroborated by semi-structured interviews (see below). in some very small communities, the minimum number could not be achieved. in urban areas, interviews took place in public places, while in rural communities in the households during the visits. the interviews lasted from 10 to 30 minutes. if possible, interviews were conducted in spanish, else with the assistance of a local translator. selected interviews were recorded by video. the informant’s prior informed consent was obtained, and relevant socio-economic data were gathered. in rural areas, semi-structured interviews of approximately 60 to 90 minutes were based on general aspects of the informant’s daily life in relation to and experience with cd, focusing on the knowledge of insect vectors. interviews related to the ecological knowledge about  triatoma  spp. were recorded. additionally, we conducted interviews with local health workers and fumigation technicians. the interviews and observations were registered in field notebooks, photographs or recorded as videos. upon completion of the structured interviews (see above), the informants were educated about the role of triatomine bugs in cd transmission.",Method,Yes,No,N/A,N/A,N/A,N/A,Method,Yes,No,N/A,Yes,10.1101/862029,2019/12/03,http://dx.doi.org/10.1101/862029,bioRxiv
21/6/2019,2019,10.3390/ijerph16122191,"Cooperative Behavior, Physical Fitness, Sports",Missing,"2.1. data sources according to  the statistical bulletin of china’s sports and related industries  published by the state sports general administration and  the report on the development of china’s sports industry , we obtained data on the total output of national sports and related industries, the total output of manufacturing industry of sport goods and related products and the total output of sport services during the period 2000–2017, and the total output of national sports and related industries data in 2008 is from the national bureau of statistics (nbs)  the second national economic census of the main data bulletin  [ 27 ]. based on  the survey report on the current situation of national mass sports  published by the state sports general administration in 2000, 2007 and 2014, we adopted the method of calculating the total sports consumption of urban and rural residents in  the 2010 china leisure development report  [ 28 ] published by the chinese academy of social sciences. we calculated the total sport consumption of urban and rural residents in 2000–2017 and the consumption of sport goods and sport services in 2000, 2007 and 2014. the data used to estimate the average annual growth rate of the per capita disposable income of urban residents was all derived from  the statistical yearbook  of the national bureau of statistics.",Method,Yes,No,N/A,N/A,N/A,N/A,DA,Yes,No,N/A,No,N/A,N/A,N/A,N/A
30/10/2020,2020,10.3390/ijerph17217977,"Attitude of Health Personnel, Emigration and Immigration, Quality of Life, Students, Nursing",Missing,N/A,Method,Yes,No,N/A,N/A,N/A,N/A,N/A,No,No,N/A,No,N/A,N/A,N/A,N/A
2/3/2021,2021,10.1186/s12876-021-01680-1,"Helicobacter Infections, Helicobacter pylori",Missing,availability of data and materials the datasets used and analyzed in the current study are available from the corresponding author on reasonable request.,Method,Yes,Yes,Online,N/A,N/A,N/A,N/A,No,No,N/A,No,N/A,N/A,N/A,N/A
15/3/2020,2020,10.1155/2020/4106383,Diabetic Foot,Missing,data availability the original data of this study could be available for the third body only up on authors request.,Method,Yes,No,N/A,N/A,N/A,N/A,DA,Yes,No,N/A,Yes,10.21203/rs.3.rs-140401/v1,2021/01/09,http://dx.doi.org/10.21203/rs.3.rs-140401/v1,Research Square
17/9/2021,2021,10.1186/s12891-021-04689-5,"Arthroplasty, Replacement, Knee, Knee Prosthesis, Prosthesis-Related Infections",Missing,availability of data and materials the datasets used and/or analysed during the current study are available from the corresponding author on reasonable request.,Method,Yes,Yes,Online,N/A,N/A,N/A,N/A,No,No,N/A,No,N/A,N/A,N/A,N/A
26/8/2020,2020,10.1186/s13195-020-00668-5,"Alzheimer Disease, Positron Emission Tomography Computed Tomography",Missing,"availability of data and materials data generated and/or analyzed during this study are included in this article and its supplementary information files. additionally, the datasets used/analyzed in the current study are available from the corresponding author on reasonable request.",Method,Yes,Yes,Online,N/A,N/A,N/A,N/A,No,No,N/A,Yes,10.21203/rs.3.rs-24688/v2,2020/06/24,http://dx.doi.org/10.21203/rs.3.rs-24688/v2,Research Square
13/1/2021,2021,10.1186/s12939-020-01374-2,"COVID-19, Communicable Disease Control, Health Policy, Healthcare Disparities",Missing,"availability of data and materials the datasets analyzed during the current study are available in the johns hopkins coronavirus resource center repository, [ https://coronavirus.jhu.edu/ ].",Method,Yes,Yes,Online,https://coronavirus.jhu.edu/,N/A,N/A,N/A,No,No,N/A,Yes,10.21203/rs.3.rs-77509/v1,2020/09/17,http://dx.doi.org/10.21203/rs.3.rs-77509/v1,Research Square
24/3/2021,2021,10.1038/s41598-021-86374-0,"Asians, LIM Domain Proteins, Potassium Channels, Tandem Pore Domain, Transcription Factors",Missing,N/A,Method,Yes,No,N/A,N/A,N/A,N/A,Method|Fulltext,Yes,No,N/A,No,N/A,N/A,N/A,N/A
12/1/2021,2021,10.1038/s41467-020-20624-z,"Apoptosis Regulatory Proteins, GABAergic Neurons, Microtubule-Associated Proteins, Synaptic Transmission",Missing,source data source data|data availability the data supporting the findings of this manuscript are available from the corresponding author upon reasonable request. the coordinates and structure factors of the gabarapl1 and γ2-gaba a r complex have been deposited in the protein data bank with accession number 7cdb [10.2210/pdb7cdb/pdb].  source data  are provided with this paper.,Method,Yes,Yes,Online,10.2210/pdb7cdb/pdb,N/A,N/A,Method,Yes,No,N/A,No,N/A,N/A,N/A,N/A
10/6/2021,2021,10.1007/s11095-021-03061-5,"Chemical Engineering, Chemistry, Pharmaceutical, Dry Powder Inhalers",Missing,N/A,Method,Yes,No,N/A,N/A,N/A,N/A,N/A,No,No,N/A,No,N/A,N/A,N/A,N/A
10/2020,2020,10.3201/eid2610.191646,"Papillomavirus Infections, Sexually Transmitted Diseases",Missing,N/A,Method,Yes,No,N/A,N/A,N/A,N/A,Method,Yes,No,N/A,No,N/A,N/A,N/A,N/A
13/7/2021,2021,10.3390/v13071355,"Environmental Monitoring, Poliomyelitis, Poliovirus",Missing,N/A,Method,Yes,No,N/A,N/A,N/A,N/A,N/A,No,No,N/A,No,N/A,N/A,N/A,N/A
27/4/2019,2019,10.1186/s40360-019-0297-7,"Drug-Related Side Effects and Adverse Reactions, Emergency Service, Hospital",Missing,availability of data and materials the datasets generated and/or analyzed during the current study are available from the corresponding author on reasonable request.,Method,Yes,No,N/A,N/A,N/A,N/A,DA,Yes,No,N/A,No,N/A,N/A,N/A,N/A
10/1/2022,2022,10.1186/s12958-021-00877-z,"Embryo Implantation, Endometrium, Hysteroscopy, Leukemia Inhibitory Factor",Missing,availability of data and materials no,Method,Yes,No,N/A,N/A,N/A,N/A,N/A,No,No,N/A,No,N/A,N/A,N/A,N/A
15/10/2021,2021,10.1186/s12879-021-06753-w,"Epididymitis, Orchitis, Tuberculosis, Male Genital",Missing,availability of data and materials the datasets used and/or analyzed in the current study are available from the corresponding author upon reasonable request.,Method,Yes,No,N/A,N/A,N/A,N/A,N/A,No,No,N/A,No,N/A,N/A,N/A,N/A
30/12/2019,2019,10.1186/s12967-019-02192-z,None,Missing,availability of data and materials all data generated or analyzed during this study are included in this published article.,Method,Yes,Yes,Online,N/A,N/A,N/A,Method,Yes,No,N/A,No,N/A,N/A,N/A,N/A
23/11/2021,2021,10.1038/s41598-021-01962-4,"Body Mass Index, Breast Neoplasms, Cardiorespiratory Fitness, Exercise, Resistance Training",Missing,data availability the datasets generated during and/or analyzed during the current study are available from the corresponding author on reasonable request.,Method,Yes,Yes,Online,N/A,N/A,N/A,Method,Yes,No,N/A,Yes,10.21203/rs.3.rs-711700/v1,2021/07/16,http://dx.doi.org/10.21203/rs.3.rs-711700/v1,Research Square
30/4/2019,2019,10.1128/mBio.00693-19,"Pharyngitis, Streptococcal Infections, Streptococcus pyogenes, Tonsillitis",Australia,N/A,Method,Yes,No,N/A,N/A,N/A,N/A,N/A,No,No,N/A,No,N/A,N/A,N/A,N/A
14/3/2022,2022,10.1038/s41467-022-29011-2,Permafrost,Missing,data availability all new data produced for this study are from samples from a continuous pliocene to pleistocene lacustrine record on the northern tibetan plateau. the authors declare that all data supporting the findings of this study are available within the article and its supplementary data and are accessible online at 10.6084/m9.figshare.19033130.v2.|code availability no code was developed for this study.,Method,Yes,Yes,Supplementary Information|Online,"10.6084/m9.figshare.19033130.v2, www.geomapapp.org",N/A,figshare,DA,Yes,Yes,Online,No,N/A,N/A,N/A,N/A
19/4/2020,2020,10.1186/s12864-020-6704-z,"Campylobacter coli, Campylobacter jejuni, Gene Deletion, Type V Secretion Systems, Virulence Factors",Missing,"availability of data and materials all data generated or analysed during this study are included in this published article [and its additional information files] and is publicly available from  http://pubmlst.org/campylobacter  and  https://www.ncbi.nlm.nih.gov/genome . genbank accession numbers:  c. jejuni  capc1: wp_002866779.1;  c. coli  capc2: wp_052793243.1;  c. jejuni  capc3: wp_022552386.1;  c. coli  capc4: wp_023362112.1;  c. jejuni  capd1: wp_126232584.1;  c. jejuni  capd2: wp_126216674.1;  c. coli  capd3: wp_020974791.1;  c. jejuni  capd4: wp_070298870.1;  c. lari  capc1: wp_114640428.1;  c. lari  capc2: wp_074691797.1;  c. peloridis  capc: wp_044598937.1;  c. ornithocola  capc: wp_066008681.1;  c. insulaenigrae  capc: wp_039650305.1;  c. cuniculorum  capc: arj56787.1;  c. volucris  capd: wp_039665304.1;  c. upsaliensis  capc: translated as frameshifted protein from nz_ufuz01000001.1;  c. subantarcticus  capc: wp_039664182.1 (n-terminus) and wp_082018437.1 (c-terminus);  c. ornithocola  capd: ocx42345.1 (c-terminal part, n-terminal part translated from genome sequence lxsu01000139.1);  c. subantarcticus  capd: n-terminus translated from genome sequence, mpb98625.1 (middle part), mpb98624.1 (c-terminus).",Method,Yes,Yes,Online,"http://pubmlst.org/campylobacter, https://www.ncbi.nlm.nih.gov/genome",N/A,"PubMLST (Public databases for molecular typing
and microbial genome diversity)",Method|Fulltext,Yes,No,N/A,No,N/A,N/A,N/A,N/A
14/6/2019,2019,10.1038/s41467-019-10586-2,"Acetylglucosaminidase, Bacterial Proteins",Missing,data availability the atomic coordinates and structure factors of lpqi are available from protein data bank with accession code 6gfv. all data used to generate the figures are available in the source data file. other data that support the findings of this study are available from the authors on request.,Method,Yes,Yes,Online,N/A,N/A,N/A,DA,Yes,Yes,Online,Yes,10.1101/312876,2018/05/03,http://dx.doi.org/10.1101/312876,bioRxiv
02/10/2019,2019,10.7554/eLife.43646,"Axons, Nonmuscle Myosin Type IIA, Presenilin-1, Receptor, EphA3",Spain,data availability all data generated or analysed during this study are included in the manuscript and supporting files.,Method,Yes,Yes,Online,"10.7554/elife.43646.015, 10.7554/elife.43646.016, 10.7554/eLife.43646.007Figure, 10.7554/eLife.43646.013Figure, 10.7554/eLife.43646.005Figure, 5.PS/γ-secretase-dependent, 10.7554/eLife.43646.011Figure, 10.7554/eLife.43646.006Figure, 10.7554/eLife.43646.003Figure, 10.7554/eLife.43646.002Figure, 10.7554/elife.43646.014, http://www.ebi.ac.uk, 10.7554/eLife.43646.009Figure, 10.7554/eLife.43646.012Figure, 10.7554/eLife.43646.004Figure, 10.7554/eLife.43646.008Figure, 10.7554/eLife.43646.010Figure",N/A,N/A,Method|Fulltext,Yes,No,N/A,No,N/A,N/A,N/A,N/A
28/2/2022,2022,10.1186/s12885-022-09329-2,"3-Iodobenzylguanidine, Antineoplastic Combined Chemotherapy Protocols, Iodine Radioisotopes, Neuroblastoma",Missing,availability of data and materials the datasets used and/or analysed during the current study available from the corresponding author on reasonable request.,Method,Yes,No,N/A,N/A,N/A,N/A,N/A,No,No,N/A,Yes,10.21203/rs.3.rs-731005/v1,2021/07/30,http://dx.doi.org/10.21203/rs.3.rs-731005/v1,Research Square
22/3/2019,2019,10.1038/s41416-019-0404-y,"Prognosis, Transcriptome, Tumor Microenvironment",Missing,software used for the study and available data version 3.3.3 of r was used for the statistical analysis. figures were performed using graphpad version 7.03. all data and r code can be downloaded on github ( https://github.com/klopfe/glioblastoma ).|data availability all data and r code can be downloaded on github ( https://github.com/klopfe/glioblastoma ).,Method,Yes,Yes,Online,https://github.com/klopfe/glioblastoma,N/A,Github,DA|Method|Fulltext,Yes,Yes,Online,No,N/A,N/A,N/A,N/A
1/9/2020,2020,10.1186/s12904-020-00643-9,"Clinical Decision-Making, Proxy",Missing,availability of data and materials additional data are available under supplementary martial-additional files  1  to  5 . raw data are available from the corresponding author upon request.,Method,Yes,Yes,Online,N/A,N/A,N/A,DA,Yes,No,N/A,No,N/A,N/A,N/A,N/A
18/1/2019,2019,10.3390/molecules24020337,Drug Design,Missing,N/A,Method,Yes,No,N/A,N/A,N/A,N/A,N/A,No,No,N/A,No,N/A,N/A,N/A,N/A
22/6/2020,2020,10.1111/jcpp.13258,"Digital Technology, Mental Health",Missing,N/A,Method,Yes,No,N/A,N/A,N/A,N/A,N/A,No,No,N/A,No,N/A,N/A,N/A,N/A
20/1/2021,2021,10.1186/s13073-020-00825-3,"Bacterial Proteins, Gram-Positive Bacterial Infections, Hospitals, Vancomycin Resistance",Missing,"availability of data and materials the raw paired-end reads of the 309 vre isolates are available through the european nucleotide archive project prjeb28495 [ 62 ]. the previous complete  vana  plasmid sequences ( n  = 26) used to define the plasmid types (a–f) are also available through the european nucleotide project prjeb28495  https://www.ebi.ac.uk/ena/browser/view/prjeb28495  [ 62 ] and the gitlab project  https://gitlab.com/sirarredondo/vancomycin_dissemination  [ 43 ]. the plasmid sequences derived from the plsdb database [ 34 ] considered in the manuscript have the following european nucleotide archive number accessions: ap022823.1, kx574671.1,kx810025.1,kx810026.1, kx853854.1, kx976485.1, ky554216.1, ky595962.1, ky595966.1, mg674582.1, nc_005054.1, nc_008768.1, nc_008821.1, nc_010980.1, nc_011140.1, nc_013317.1, nc_014475.1, nc_014726.1, nc_014959.1, nc_016967.1, nc_019213.1, nc_019284.1, nc_021170.1, nz_ap022343.1, nz_cp011284.1, nz_cp012431.1, nz_cp012464.1, nz_cp012594.1, nz_cp013996.1, nz_cp014452.1, nz_cp014531.1, nz_cp016166.1, nz_cp017795.1, nz_cp018130.1, nz_cp018825.1, nz_cp018831.1, nz_cp019210.1, nz_cp019973.1, nz_cp019995.1, nz_cp020486.1, nz_cp022486.1, nz_cp023796.1, nz_cp025755.1, nz_cp027500.1, nz_cp027505.1, nz_cp027510.1, nz_cp027516.1, nz_cp027519.1, nz_cp033209.1, nz_cp035644.1, nz_cp035650.1, nz_cp036247.1, nz_cp040238.1, nz_cp040708.1, nz_cp041269.1, nz_cp041279.1 nz_cp044276.1 nz_cp046078.1, and nzlr135256.1, nz_lt603681.1. these plsdb sequences are also available at  https://gitlab.com/sirarredondo/vancomycin_dissemination  [ 43 ]. the complete code used to generate the results present in this manuscript is provided in a rmarkdown document available through  https://gitlab.com/sirarredondo/vancomycin_dissemination  [ 43 ].",Method,Yes,Yes,Supplementary Information|Online,"https://microreact.org/project/FCUD_d1ztHowever, https://microreact.org/project/FCUD_d1zt, https://www.ebi.ac.uk/ena/browser/view/prjeb28495, https://microreact.org/project/FCUD_d1ztDynamics, https://gitlab.com/sirarredondo/vancomycin_dissemination",PRJEB28495,"ENA or EBI Sequence Read Archive, Git Lab, microreact.org ,  European Variation Archive",DA|Method|Fulltext,Yes,Yes,Online,Yes,10.1101/2020.07.21.20158808,2020/07/22,http://dx.doi.org/10.1101/2020.07.21.20158808,medRxiv
4/12/2019,2019,10.1186/s12910-019-0429-z,"Intensive Care Units, Physicians, Resuscitation Orders",Missing,availability of data and materials the dataset for this study is available on reasonable request by qualified researchers to drs. yen-yuan chen and kuan-han lin.,Method,Yes,No,N/A,N/A,N/A,N/A,DA|Method,Yes,No,N/A,No,N/A,N/A,N/A,N/A
17/2/2022,2022,10.1186/s12890-022-01856-9,"Asthma, Hypersensitivity, Immediate, Phenotype, Pulmonary Eosinophilia",Missing,availability of data and materials the datasets used during the current study are available from the corresponding author upon request.,Method,Yes,Yes,Online,N/A,N/A,N/A,N/A,No,No,N/A,No,N/A,N/A,N/A,N/A
5/8/2021,2021,10.1155/2021/3195957,"Antineoplastic Agents, Proto-Oncogene Proteins c-mdm2",Missing,data availability all used data is within the paper.,Method,Yes,No,N/A,N/A,N/A,N/A,N/A,No,No,N/A,No,N/A,N/A,N/A,N/A
13/3/2020,2020,10.3390/molecules25061317,"Deep Learning, Models, Molecular, Quantitative Structure-Activity Relationship, Receptors, Aryl Hydrocarbon",Missing,N/A,Method,Yes,No,N/A,N/A,N/A,N/A,Method,Yes,No,N/A,No,N/A,N/A,N/A,N/A
21/9/2020,2020,10.1002/cam4.3461,"Antineoplastic Agents, Breast Neoplasms, Cost of Illness, Health Care Costs",Missing,data availability statement the data that support the findings of this study are available from the corresponding author upon reasonable request.,Method,Yes,No,N/A,N/A,N/A,N/A,DA,Yes,No,N/A,No,N/A,N/A,N/A,N/A
23/2/2019,2019,10.3390/s19040952,"Basidiomycota, Triticum",Missing,N/A,Method,Yes,No,N/A,N/A,N/A,N/A,Method,Yes,No,N/A,No,N/A,N/A,N/A,N/A
25/8/2021,2021,10.1038/s41598-021-96281-z,"Adenocarcinoma, Colonoscopy, Colorectal Neoplasms, Optical Imaging, Single-Chain Antibodies",Missing,N/A,Method,Yes,No,N/A,N/A,N/A,N/A,N/A,No,No,N/A,Yes,10.21203/rs.3.rs-128088/v1,2020/12/28,http://dx.doi.org/10.21203/rs.3.rs-128088/v1,Research Square
24/3/2021,2021,10.1038/s41598-021-86087-4,"Gene Expression Profiling, Multiplex Polymerase Chain Reaction, Reverse Transcriptase Polymerase Chain Reaction, Single-Cell Analysis",Missing,data availability the datasets generated during and/or analysed during the current study are available from the corresponding author on reasonable request.,Method,Yes,Yes,Online,www.jmp.com,N/A,N/A,Method|Fulltext,Yes,No,N/A,No,N/A,N/A,N/A,N/A
27/3/2021,2021,10.3390/nu13041101,"Kidney Transplantation, Polymorphism, Genetic, Receptors, Calcitriol, Vitamin D-Binding Protein",Missing,data availability statement the data presented in this study are available on request from the corresponding author.,Method,Yes,No,N/A,N/A,N/A,N/A,N/A,No,No,N/A,No,N/A,N/A,N/A,N/A
17/5/2020,2020,10.7150/thno.44868,"Cell Movement, Cellular Reprogramming, Epithelial-Mesenchymal Transition, Gene Expression Regulation, Neoplastic, MicroRNAs",Missing,N/A,Method,Yes,No,N/A,N/A,N/A,N/A,N/A,No,No,N/A,No,N/A,N/A,N/A,N/A
18/2/2021,2021,10.3390/ijms22042029,"Calcium Chloride, Models, Biological, Sensation",Missing,data availability statement the data presented in this study are available on request from the corresponding author.,Method,Yes,Yes,Online,https://www.mdpi.com/1422-0067/22/4/2029/s1,N/A,N/A,N/A,No,No,N/A,No,N/A,N/A,N/A,N/A
12/5/2020,2020,10.1186/s40644-020-00314-1,"Angiogenesis Inhibitors, Brain Neoplasms, Elasticity Imaging Techniques, Glioblastoma, Magnetic Resonance Imaging",Missing,availability of data and materials the datasets analyzed during the current study are available from the corresponding authors on reasonable request.,Method,Yes,No,N/A,N/A,N/A,N/A,N/A,No,No,N/A,No,N/A,N/A,N/A,N/A
10/12/2020,2020,10.7554/eLife.61635,"Gene Expression Regulation, Developmental",United States of America,data availability all of the raw and processed data described in this paper are available on data dryad at  https://doi.org/10.6078/d1xx33  and computational notebooks with necessary data to regenerate analyses and figures is available in supplementary file 1 and at  https://github.com/mbeisen/berrocal_2020  (copy archived at  https://archive.softwareheritage.org/swh:1:rev:d983098bd5183f9907d633c425f80b2cb5282a8b/ ). the following dataset was generated: eisen mb 2018 kinetic sculpting of the seven stripes of the drosophila even-skipped gene dryad digital repository 10.6078/d1xx33,Method,Yes,Yes,Online,"https://archive.softwareheritage.org/swh:1:rev:d983098bd5183f9907d633c425f80b2cb5282a8b/, https://github.com/mbeisen/berrocal_2020, 10.6078/d1xx33, https://doi.org/10.6078/d1xx33",N/A,"Github, archive.softwareheritage.org",Method|Supplementary,Yes,Yes,Online,Yes,10.1101/335901,2018/05/31,http://dx.doi.org/10.1101/335901,bioRxiv
11/11/2021,2021,10.3390/ijerph182211818,Depression,Missing,data availability statement the data presented in this study are available on request from the corresponding author. the data are not publicly available due to privacy.,Method,Yes,No,N/A,N/A,N/A,N/A,N/A,No,No,N/A,No,N/A,N/A,N/A,N/A
27/2/2019,2019,10.3390/ijms20051044,"Camellia sinensis, Chloroplasts, Cyclopentanes, Oxylipins, Plant Leaves, Stress, Physiological, Volatile Organic Compounds",Missing,N/A,Method,Yes,Yes,Online,https://www.mdpi.com/1422-0067/20/5/1044/s1,N/A,N/A,N/A,No,No,N/A,No,N/A,N/A,N/A,N/A
30/1/2021,2021,10.1186/s12884-021-03581-3,"Breast Feeding, Cleft Lip, Cleft Palate, Mothers, Social Support",Missing,availability of data and materials the datasets used and/or analyzed during the current study are available from the corresponding author on reasonable request.,Method,Yes,Yes,Online,N/A,N/A,N/A,N/A,No,No,N/A,Yes,10.21203/rs.2.16333/v1,2019/10/23,http://dx.doi.org/10.21203/rs.2.16333/v1,Research Square
05/03/2022,2022,10.3390/biom12030405,"Glutamate Carboxypeptidase II, Prostatic Neoplasms",Missing,data availability statement not applicable.,Method,Yes,Yes,Online,"https://www.mdpi.com/article/10.3390/biom12030405/s1, 10.3390/biom12030405/s1",N/A,N/A,Method,Yes,No,N/A,No,N/A,N/A,N/A,N/A
02/07/2020,2020,10.1096/fj.202000773R,"Cell Movement, Matrix Metalloproteinase 15, Obesity, Maternal, Pregnancy Trimester, First, Trophoblasts",Missing,N/A,Method,Yes,No,N/A,N/A,N/A,N/A,N/A,No,No,N/A,No,N/A,N/A,N/A,N/A
14/6/2021,2022,10.1007/s40618-021-01609-1,"Adenoma, Growth Hormone-Secreting Pituitary Adenoma, Octreotide, Somatostatin",Missing,N/A,Method,Yes,No,N/A,N/A,N/A,N/A,N/A,No,No,N/A,No,N/A,N/A,N/A,N/A
13/11/2019,2019,10.3390/molecules24224099,"Filtration, Humic Substances, Membranes, Artificial, Polyvinyls, Water",Missing,N/A,Method,Yes,No,N/A,N/A,N/A,N/A,N/A,No,No,N/A,No,N/A,N/A,N/A,N/A
31/3/2019,2019,10.1007/s11356-019-04856-1,"Nanoparticles, Oncorhynchus mykiss, Titanium, Water Pollutants, Chemical",Missing,N/A,Method,Yes,Yes,Online,N/A,N/A,N/A,N/A,No,No,N/A,No,N/A,N/A,N/A,N/A
25/9/2020,2021,10.1007/s41999-020-00397-w,"Geriatric Assessment, Inpatients",Missing,"data collection data were collected from march to june 2018. prior to the start of the data collection, a research assistant (ev or eg) visited each hospital to explain the data collection procedures to the members of the igct. each igct completed the questionnaire to map the hospital and team characteristics and filled out one checklist per patient detailing the patient characteristics and igct recommendations. informed consent was obtained from all participants prior to data collection. after data collection, the anonymous patient checklists were collected by the research team.|data availability the anonymous data set is available upon reasonable request to the corresponding author.|code availability not applicable.",Method,Yes,Yes,Online,N/A,N/A,N/A,DA,Yes,Yes,Online,No,N/A,N/A,N/A,N/A
30/6/2021,2021,10.1590/2177-6709.26.3.e2119300.oar,"Palatal Expansion Technique, Sexual and Gender Minorities",Missing,N/A,Method,Yes,No,N/A,N/A,N/A,N/A,N/A,No,No,N/A,No,N/A,N/A,N/A,N/A
30/6/2021,2021,10.3390/ijerph18137009,"COVID-19, Universities",Missing,data availability statement the data used or analyzed during the current study are available from the corresponding author on request.,Method,Yes,Yes,Online,https://www.wjx.cn/,N/A,N/A,N/A,No,No,N/A,No,N/A,N/A,N/A,N/A
3/12/2021,2022,10.1007/s11356-021-17838-z,"Fluorocarbons, Sewage",Missing,data availability the datasets used and/or analyzed during the current study are available from the corresponding author on reasonable request.,Method,Yes,Yes,Online,N/A,N/A,N/A,N/A,No,No,N/A,No,N/A,N/A,N/A,N/A
25/9/2021,2021,10.3390/medicina57101009,"Mandible, Maxilla",Missing,"data availability statement the data that support the findings of this study are available from the corresponding author, upon reasonable request.",Method,Yes,No,N/A,N/A,N/A,N/A,N/A,No,No,N/A,No,N/A,N/A,N/A,N/A
9/2/2021,2021,10.1038/s41392-020-00411-4,"Diet, Ketogenic, Ketone Bodies, Sirtuins",Missing,data availability the data sets used for the current study are available from the corresponding author upon reasonable request.,Method,Yes,Yes,Online,N/A,N/A,N/A,Method|Fulltext,Yes,No,N/A,No,N/A,N/A,N/A,N/A
29/5/2019,2019,10.1002/ajpa.23863,"Asians, Human Migration, Names, Population Dynamics",Missing,N/A,Method,Yes,No,N/A,N/A,N/A,N/A,N/A,No,No,N/A,No,N/A,N/A,N/A,N/A
9/2021,2021,10.4314/ahs.v21i3.51,"Medicine, African Traditional, Mental Health",Missing,"data collection data was collected from study participants from march 2012 through april 2012. ethical approval for this study was obtained from the university of liberia institutional review board, the partners healthcare institutional review board, and the integrated network for subject protection in research – boston university medical campus institutional review board. written informed consent was obtained from all study participants. participants were explicitly given the right to refuse participation or to stop participation at any time. confidentiality was maintained using study ids for each participant and all identifying information was removed prior to transcription. access to study data was restricted to the investigator and the research team. all electronic versions of the documents required password protection and storage on a secure network. all discussions were held using the preferred language (either liberian english or standard english) of the study participant, and if participants were non-english speaking, the moderator helped to facilitate translation of the interview. all interviews were digitally recorded and transcribed verbatim. an expert in qualitative interviewing and coding trained all study staff. interviews with study participants were recorded and notes were taken by both the primary interviewer and the moderator during and after the interview to ensure accuracy.",Method,Yes,No,N/A,N/A,N/A,N/A,N/A,No,No,N/A,No,N/A,N/A,N/A,N/A
24/3/2022,2022,10.1038/s41598-022-09118-8,Social Networking,Missing,code availability the code that supports the findings of this study is available from the corresponding author upon request.,N/A,No,Yes,Online,N/A,N/A,N/A,DA,Yes,Yes,Online,Yes,10.48550/arxiv.2110.03407,N/A,https://arxiv.org/abs/2110.03407,arXiv
13/10/2021,2021,10.3390/ijerph182010750,Cardiorespiratory Fitness,Missing,N/A,Method,Yes,No,N/A,N/A,N/A,N/A,Method|Fulltext,Yes,No,N/A,No,N/A,N/A,N/A,N/A
11/3/2019,2019,10.3390/molecules24050989,"Chromatography, Liquid, Drug Delivery Systems, Nanotechnology, Phthalazines, Piperazines, Tandem Mass Spectrometry",Missing,N/A,Method,Yes,No,N/A,N/A,N/A,N/A,N/A,No,No,N/A,No,N/A,N/A,N/A,N/A
14/7/2019,2019,10.3390/ijerph16142518,"Carbon, Food Packaging, Nitrogen, Quantum Dots, Silver",Missing,N/A,Method,Yes,No,N/A,N/A,N/A,N/A,N/A,No,No,N/A,No,N/A,N/A,N/A,N/A
28/8/2020,2020,10.1038/s41392-020-0200-4,"Antibodies, Neoplasm, Carcinoma, Non-Small-Cell Lung, Lung Neoplasms, Mitomycin, Neoplasm Proteins, Programmed Cell Death 1 Receptor",Missing,data availability all data generated or analyzed during this study are included in this published article. all the original data would be deposited in the database ( http://www.researchdata.org.cn/ ). the approved rdd number is rddb2020000827.,Method,Yes,Yes,Online,"http://www.researchdata.org.cn/, http://alggen.lsi.upc.es/, http://jaspar.genereg.net/",N/A,N/A,N/A,No,No,N/A,No,N/A,N/A,N/A,N/A
15/6/2020,2020,10.1186/s12870-020-02488-z,"Genetic Introgression, Life History Traits, Phenotype, Plant Breeding, Quantitative Trait Loci, Triticum",Missing,availability of data and materials all data generated in this study are included in the paper and the supporting information files. the datasets of genetic polymorphisms from all lines of ‘lumai 14’ × ‘shaanhan 8675’ il population are available from the figshare digital repository: 10.6084/m9.figshare.12442112.v1.,Method,Yes,Yes,Online,10.6084/m9.figshare.12442112.v1,N/A,figshare,N/A,No,No,N/A,No,N/A,N/A,N/A,N/A
12/11/2020,2020,10.3390/ijerph17228389,"City Planning, Cold Temperature, Microclimate, Universities",Missing,N/A,Method,Yes,No,N/A,N/A,N/A,N/A,N/A,No,No,N/A,No,N/A,N/A,N/A,N/A
29/9/2020,2020,10.1038/s41598-020-73039-7,"Asians, Family Planning Policy",Missing,data availability the data used and analysed during the current study are available from the corresponding author on reasonable request.,Method,Yes,Yes,Online,https://www.graphpad.com/,N/A,N/A,Method|Fulltext,Yes,No,N/A,No,N/A,N/A,N/A,N/A
24/4/2020,2020,10.1155/2020/3938640,"Analgesics, Ethanolamines, Migraine Disorders, Palmitic Acids",Missing,data availability the clinical data used to support the findings of this study are included within the article.,Method,Yes,No,N/A,N/A,N/A,N/A,N/A,No,No,N/A,No,N/A,N/A,N/A,N/A
9/7/2021,2021,10.1186/s12862-021-01873-y,Oryza,Missing,"availability of data and materials the datasets generated and/or analysed during the current study are available in the fishare repository, [ https://figshare.com/articles/online_resource/the_date_of_mate_family_rar/14616717 ].",Method,Yes,Yes,Online,https://figshare.com/articles/online_resource/the_date_of_mate_family_rar/14616717,N/A,figshare,Method|Fulltext,Yes,No,N/A,Yes,10.21203/rs.3.rs-62337/v1,2020/08/27,http://dx.doi.org/10.21203/rs.3.rs-62337/v1,Research Square
7/11/2021,2021,10.1186/s12885-021-08914-1,"Cell Proliferation, MicroRNAs",Missing,availability of data and materials the datasets of bc in this study were downloaded from the geo and ucsc xena ( https://www.ncbi.nlm.nih.gov/geo/ ;  https://xenabrowser.net/datapages/ ) databases.,Method,Yes,Yes,Online,"https://xenabrowser.net/datapages/, https://www.ncbi.nlm.nih.gov/geo/, http://www.ncbi.nlm.nih.gov/geo/, http://xena.ucsc.edu/",N/A,"Gene Expression Omnibus, xenabrowser.net",DA|Method|Supplementary|Fulltext,Yes,Yes,Online,No,N/A,N/A,N/A,N/A
12/4/2021,2021,10.1038/s41598-021-86705-1,"Antiparkinson Agents, Dyskinesia, Drug-Induced, Levodopa, Parkinson Disease, Wearable Electronic Devices",Missing,"data collection protocol below we describe the experiment design and collection protocol for the movement and dyskinesia data 29 , 30 . all experiments were performed in accordance with the approved protocol. study design and movement data  inertial sensors (great lakes neurotechnologies inc., cleveland, oh) were used in the study to record the 3-dimensional angular velocity and acceleration with a sampling rate of 64 hz. the subjects were asked to stop their pd medications the night before the experiment, so dyskinesia in both medication states can be observed and recorded. a the beginning of the experiment, two sensors were mounted on the wrist and ankle of the subject’s most affected side. each subject performed four rounds of adl as the motion signals were collected. the activities in each round were walking, resting by setting on a chair, using a knife and fork to cut food, putting on and taking off a coat, drinking water from a cup, unpacking groceries, and combing hair using the left then the right hand. after performing the first round, the subjects resumed their normal pd medications. a neurologist identified when the medication kicked in and then asked the subjects to perform the s round of experiment. the other two rounds were 1-h apart. the 4-h procedure allowed capturing the change in pd symptoms and dyskinesia during a long interval. figure  1 a shows the timings of the four rounds for one of the subjects. nine subjects were due for another scheduled dose of levodopa before the fourth round. each activity took between 15 to 60 s. two subjects had only 3 rounds of activities because they started the experiment in the on state, resulting in a total number of 58 rounds ( \documentclass[12pt]{minimal} 				\usepackage{amsmath} 				\usepackage{wasysym}  				\usepackage{amsfonts}  				\usepackage{amssymb}  				\usepackage{amsbsy} 				\usepackage{mathrsfs} 				\usepackage{upgreek} 				\setlength{\oddsidemargin}{-69pt} 				\begin{document}$$n_r$$\end{document} n r ) for all the subjects. the recording time of all the rounds for one subject on average was 13.7 ± 1.6 min. dyskinesia assessment before each round, the unified parkinson’s disease rating scale part iii (updrs-iii) was performed by a neurologist. also, the experiments were video-taped. later, the dyskinesia severity of each activity was rated by two movement disorder experts based on the recorded videos using the maims score. the average of the total maims scores from the two raters was used to minimize the effect of inter-rater variability, resulting in one gold-standard dyskinesia score for each activity trial. in maims, a severity score between 0 and 4 (no dyskinesia to severe dyskinesia) is given for each one of the four extremities, head/neck, trunk and global. the total maims is the sum of all these sub-scores resulting in a range between 0 and 28.",Method,Yes,Yes,Online,N/A,N/A,N/A,Method,Yes,No,N/A,No,N/A,N/A,N/A,N/A
9/6/2021,2021,10.1152/jn.00120.2021,"Feedback, Physiological, Sensilla, Torque, Walking, Weight-Bearing",Missing,N/A,Method,Yes,No,N/A,N/A,N/A,N/A,Method|Fulltext,Yes,No,N/A,No,N/A,N/A,N/A,N/A
12/6/2019,2019,10.1038/s41598-019-44630-4,"Adjuvants, Immunologic, Antiprotozoal Agents, Chenodeoxycholic Acid, Cholecalciferol, Leishmania donovani, Leishmaniasis, Visceral, Th1 Cells, Vitamin A",Missing,N/A,Method,Yes,No,N/A,N/A,N/A,N/A,N/A,No,No,N/A,No,N/A,N/A,N/A,N/A
22/1/2019,2019,10.1038/s41598-018-36186-6,"Mendelian Randomization Analysis, Meningioma, Obesity",Missing,"data availability summary statistics for the obesity-related trait gwas using uk biobank data are available from  http://www.nealelab.is/uk-biobank/ . genotype data from the resource for genetic epidemiology research on aging can be downloaded from the database of genotypes and phenotypes (dbgap) (accession code phs000674.v2.p2). the 1000 genomes project and uk10k imputation panel data are available from the european genome-phenome archive (ega, accession egad00001000776). remaining data are available upon request.",Method,Yes,Yes,Online,http://www.nealelab.is/uk-biobank/,N/A,N/A,DA,Yes,Yes,Online,No,N/A,N/A,N/A,N/A
22/2/2022,2022,10.3390/molecules27051467,Phytoplasma,Missing,data availability statement the data presented in this study are available upon request from the corresponding author. the data are not publicly available due to privacy concerns.,Method,Yes,No,N/A,N/A,N/A,N/A,N/A,No,No,N/A,No,N/A,N/A,N/A,N/A
18/1/2020,2020,10.3390/ijms21020642,"Antineoplastic Agents, Ergocalciferols, Vitamin D, Vitamin D3 24-Hydroxylase",Missing,N/A,Method,Yes,Yes,Online,https://www.mdpi.com/1422-0067/21/2/642/s1,N/A,N/A,Method|Fulltext,Yes,No,N/A,No,N/A,N/A,N/A,N/A
9/6/2020,2020,10.1038/s41386-020-0730-z,"Buprenorphine, Schizophrenia",Missing,"data collection process and data items the population of interest was patients with schizophrenia, schizophreniform, or schizoaffective disorder. the intervention was any dose of naloxone, naltrexone, buprenorphine, or nalmefene. the comparison was saline or placebo tablets. data from studies meeting eligibility criteria (above) were coded as detailed below. the outcome measure of interest was the numerical change on scales of positive, negative, general, or total symptoms of schizophrenia, following active treatment as compared with placebo. scales utilized in these trials included the brief psychiatric rating scale (bprs) [ 16 ]; scale for the assessment of positive symptoms (saps) [ 17 ]; scale for the assessment of negative symptoms (sans) [ 18 ,  19 ]; positive and negative syndrome scale (panss) [ 20 ,  21 ]; verhaltens-beobachtungs-skala (vbs) [ 22 ]; inpatient multidimensional psychiatric rating scale (imps) [ 23 ]; national institute of mental health rating scale (nimh), also known as the inpatient behavioral rating scale [ 24 ]; and the comprehensive psychiatric rating scale (cprs) [ 25 ]. we also included studies that used patient self-reported outcomes or “custom scales.” we grouped our analysis of these scales based on the symptoms that each scale was designed to measure (thereby allowing separate meta-analyses of, e.g., positive and negative symptoms), resulting in the categories and the symptom scales that they include detailed in table  1 . we performed an independent meta-analysis for each of the scale categories that had at least six studies reporting results. when a single study reported results on multiple scales that could be included in a single analysis (e.g., for the positive total scales analysis, a study reporting bprs hallucinations and bprs unusual thought content, but not bprs thinking disturbance), effect sizes were averaged to produce a single outcome measure. in addition, we averaged together all outcome timepoints within studies, as there was considerable variability in the time delay after drug administration until symptom scales were assessed. full details on extraction of information from manuscripts, and further relevant details, are presented in  supplement  and supplementary table  s3 . table 1 analysis scale groupings. name of analysis scales included in analysis all scales combined all positive scales combined positive symptoms subgroups hallucination scales hallucinations group  bprs hallucinations  bprs hallucinatory behavior  custom scale hallucination reduction  nimh hallucinations  saps hallucinations  self-rated hallucinations  self-rated distress caused by hallucinations delusion scales delusions group  bprs paranoid suspicion  bprs unusual thought content  saps delusions other positive scales other positive symptom subscales  saps bizarre behavior  bprs thought disturbance factor  bprs thought disorder  saps thought disorder  bprs conceptual disorganization total positive scales total positive scales group  saps total  panss positive  bprs thinking disturbance total scales total scales group  panss general  bprs total  bprs total excluding hallucinatory behavior  bprs schizophrenia restricted  cprs  imps  vbs all negative scales combined total negative scales total negative scales group  sans total  panss negative  bprs negative schizophrenic symptoms other negative scales negative symptoms subgroups  bprs emotional withdrawal  bprs anergia  bprs withdrawal-retardation  sans affective flattening  sans apathy  sans inattentiveness  sans poverty of speech  sans anhedonia",Method,Yes,Yes,Online,N/A,N/A,N/A,Method,Yes,No,N/A,No,N/A,N/A,N/A,N/A
27/4/2022,2022,10.15252/msb.202110824,"Malaria, Falciparum, Parasitemia",Missing,"data availability processed bulk rna‐seq data generated for this study are available as geo series  gse181179  ( https://www.ncbi.nlm.nih.gov/geo/query/acc.cgi?acc=gse181179 ). raw data are available upon request, subject to approval by the walter and eliza hall institutional data access committee ( dataaccess@wehi.edu.au ) to ensure preservation of patient confidentiality.",Method,Yes,Yes,Online,https://www.ncbi.nlm.nih.gov/geo/query/acc.cgi?acc=gse181179,GSE181179,Gene Expression Omnibus,Method|Fulltext,Yes,No,N/A,No,N/A,N/A,N/A,N/A
11/6/2019,2019,10.1111/acel.12989,"Aging, Alzheimer Disease",Missing,N/A,Method,Yes,No,N/A,N/A,N/A,N/A,Method|Fulltext,Yes,No,N/A,No,N/A,N/A,N/A,N/A
2/6/2020,2020,10.1038/s41419-020-2517-x,"Pancreatitis, Proto-Oncogene Proteins c-myc, Signal Transduction, TOR Serine-Threonine Kinases",Missing,N/A,Method,Yes,No,N/A,N/A,N/A,N/A,N/A,No,No,N/A,No,N/A,N/A,N/A,N/A
27/3/2021,2021,10.1080/22221751.2021.1899057,"Dengue, Dengue Virus, Evolution, Molecular, Hepatitis",Missing,N/A,Method,Yes,Yes,N/A,N/A,N/A,N/A,Method,Yes,No,N/A,No,N/A,N/A,N/A,N/A
22/1/2021,2021,10.1007/s10936-021-09764-5,"Interpersonal Relations, Linguistics, Narration, Object Attachment",Missing,N/A,Method,Yes,No,N/A,N/A,N/A,N/A,N/A,No,No,N/A,No,N/A,N/A,N/A,N/A
28/7/2021,2021,10.1128/Spectrum.00585-21,Pseudomonas aeruginosa,Spain,N/A,Method,Yes,No,N/A,N/A,N/A,N/A,N/A,No,No,N/A,No,N/A,N/A,N/A,N/A
2/2022,2022,10.3325/cmj.2022.63.44,COVID-19,Missing,N/A,Method,Yes,No,N/A,N/A,N/A,N/A,N/A,No,No,N/A,No,N/A,N/A,N/A,N/A
9/8/2021,2021,10.1038/s41598-021-95762-5,"Immunoglobulin A, Interleukin-1 Receptor-Like 1 Protein, Interleukin-33",Missing,N/A,Method,Yes,No,N/A,http://www.internationalgenome.org/,N/A,N/A,N/A,No,No,N/A,No,N/A,N/A,N/A,N/A
07/01/2022,2022,10.17305/bjbms.2021.6763,"Cystitis, Proteins, Urinary Bladder Neoplasms",Missing,N/A,Method,Yes,No,N/A,N/A,N/A,N/A,N/A,No,No,N/A,No,N/A,N/A,N/A,N/A
23/1/2020,2020,10.11606/s1518-8787.2020054001627,"Health Services Needs and Demand, Primary Health Care, Referral and Consultation, Waiting Lists",Missing,N/A,Method,Yes,No,N/A,N/A,N/A,N/A,Method,Yes,No,N/A,No,N/A,N/A,N/A,N/A
6/1/2021,2021,10.1186/s12886-020-01787-1,"Botulinum Toxins, Type A, Esotropia",Missing,availability of data and materials the data are available from the corresponding author upon reasonable request.,Method,Yes,No,N/A,N/A,N/A,N/A,Method|Fulltext,Yes,No,N/A,Yes,10.21203/rs.3.rs-94486/v1,2020/10/22,http://dx.doi.org/10.21203/rs.3.rs-94486/v1,Research Square
17/11/2020,2020,10.3390/genes11111359,"Horses, Muscle, Skeletal, Transcriptome",Missing,N/A,Method,Yes,Yes,Online,https://www.mdpi.com/2073-4425/11/11/1359/s1,N/A,N/A,Method|Fulltext,Yes,No,N/A,No,N/A,N/A,N/A,N/A
21/12/2020,2021,10.1016/S2589-7500(20)30275-2,"Neoplasms, Blastocystis, Blastocystis Infections, Antineoplastic Agents, Immunological, COVID-19, COVID-19, Circadian Rhythm, Adenoids, Sleep Apnea, Obstructive, Tonsillectomy, Occupational Exposure, Radiation Exposure, COVID-19, Sleep Initiation and Maintenance Disorders, Dental Implants, Diabetes Mellitus, Peri-Implantitis, Prediabetic State, Serotonin Uptake Inhibitors, Stroke, COVID-19, Bacillus cereus, Cattle Diseases, Fasciola, Fasciola hepatica, Fascioliasis, Calcium Hydroxide, Endotoxins, COVID-19, Disabled Persons, Occupational Health, COVID-19, Sleep Initiation and Maintenance Disorders, Sleep Wake Disorders, Attention Deficit Disorder with Hyperactivity, Depressive Disorder, Major, Glaucoma, COVID-19, Dreams, Pandemics, Quarantine, Ascomycota, Fusarium, Scedosporium, COVID-19, Sleep Wake Disorders, Hypertension, Myocardial Ischemia, Noise, Occupational, Occupational Diseases, Occupational Exposure, Stroke, Environmental Pollution, Estuaries, Musculoskeletal Diseases, Occupational Diseases, Occupational Exposure, Osteoarthritis, Hip, COVID-19, Sleep Initiation and Maintenance Disorders, COVID-19, Health Personnel, Sleep Wake Disorders, Algorithms, Asbestos, Mesothelioma, Mesothelioma, Malignant, Occupational Exposure, Anthozoa, Hydrozoa, Radiation Oncology, COVID-19, Coronavirus Infections, Gastroesophageal Reflux, Tooth Attrition, Tooth Wear, Alcoholism, Occupational Diseases, Occupational Exposure, Anxiety, COVID-19, SARS-CoV-2, Sleep, Sleep Apnea, Obstructive, Dreams, Sleep Wake Disorders, Choroiditis, Tuberculosis, Ocular, Uveitis, Dermoid Cyst, Orbital Neoplasms, Mental Health, Sleep Hygiene, Adenocarcinoma, Pancreatic Neoplasms, Body Fluids, Urology, Occupational Diseases, Occupational Exposure, Stroke, Work, Psycholinguistics, Reading, Semantics, Smoking, Adenocarcinoma, Thyroid Neoplasms, Epithelial Cells, Social Justice, Mycobacterium tuberculosis, Tuberculosis, Multidrug-Resistant, Laparoscopy, Adrenergic beta-Antagonists, Surgical Procedures, Operative, Negative-Pressure Wound Therapy, Specialties, Surgical, Furans, Intestines, Liver, Metabolomics, Receptors, Cytoplasmic and Nuclear, Signal Transduction, Coronary Artery Disease, Ventricular Function, Left, Kidney Transplantation, Liver Transplantation, Accidents, Traffic, Automobile Driving, Bicycling, Pedestrians, Wounds and Injuries, Lewy Body Disease, Sleep Apnea, Central, Low Back Pain, Endometrial Neoplasms, Sentinel Lymph Node, Microplastics, Algorithms, Antipsychotic Agents, Practice Guidelines as Topic, Schizophrenia, Secondary Prevention, Neoplasm Staging, Nephrectomy, Biodiversity, Game Theory, Phylogeny, Gestures, Pattern Recognition, Visual, Social Perception, Speech, Theory of Mind, Arthroplasty, Replacement, Knee, Knee Prosthesis, Conservation of Natural Resources, Ecosystem, Models, Biological, Natural Resources, Population Dynamics, Arthroplasty, Replacement, Hip, Postoperative Complications, Longitudinal Studies, Occupational Health, Risk Assessment, Upper Extremity, Arthroplasty, Replacement, Hip, Diabetes Mellitus, Glycated Hemoglobin A, Biofilms, Oxygen, Collagen, Compressive Strength, Polyesters, Tissue Scaffolds, Child Development, Cognition, Imagination, Memory, Episodic, In Situ Hybridization, Fluorescence, Virus Latency, Accelerometry, Actigraphy, Sleep, Ultraviolet Rays, Welding, Carcinoma, Renal Cell, Kidney Neoplasms, Renal Insufficiency, Chronic, Competitive Behavior, Hockey, Social Identification, Bacillus subtilis, Protein Biosynthesis, RNA, Ribosomal, Movement, Psychomotor Performance, Upper Extremity, Visual Perception, Evolution, Molecular, Genetic Variation, Influenzavirus C, Reassortant Viruses, Feces, Water Microbiology, Water Pollutants, Water Pollution, Delivery, Obstetric, Labor, Obstetric, Midwifery, ""Nurses Role"", Obstetric Nursing, Practice Guidelines as Topic, Midwifery, Nurse Midwives, Obesity, Obstetric Nursing, Pregnancy Complications, Curriculum, Education, Nursing, Baccalaureate, Infant Health, Maternal Health, Preceptorship, Computer Graphics, Genetic Code, Models, Genetic, Nucleotides, Attention, Individuality, Psychological Theory, Visual Perception, Ethanol, Mitochondria, Oryza, Plant Extracts, Positron-Emission Tomography, Adaptation, Biological, Aspergillus, Osmotic Pressure, Stress, Physiological, Dexamethasone, Glucocorticoids, Precursor Cell Lymphoblastic Leukemia-Lymphoma, Sleep, Evolution, Molecular, Influenza A Virus, H1N1 Subtype, Acute Coronary Syndrome, Anti-Allergic Agents, Antibodies, Anti-Idiotypic, Antibodies, Monoclonal, Humanized, Pemphigoid, Bullous, Anthracyclines, Antigens, Neoplasm, DNA Topoisomerases, Type II, DNA-Binding Proteins, Proto-Oncogene Proteins c-bcl-2, Anticipation, Psychological, Choice Behavior, Gyrus Cinguli, Prefrontal Cortex, Reward, Nocturnal Myoclonus Syndrome, Restless Legs Syndrome, Electrocardiography, Electroencephalography, Polysomnography, Sleep Stages, Chromatin, Gene Library, High-Throughput Nucleotide Sequencing, RNA, Small Nuclear, Sequence Analysis, RNA, Circadian Rhythm, Light, Lighting, Sleep, Fermentation, Food Handling, Hot Temperature, Lipotropic Agents, Plants, Edible, Antipsychotic Agents, Mental Disorders, Sleep Apnea, Obstructive, Environmental Restoration and Remediation, Hydrocarbons, Chlorinated, Iron, Pesticides, Soil Pollutants, Brain Mapping, Databases as Topic, Internet, Brain Mapping, Databases as Topic, Information Storage and Retrieval, Environmental Monitoring, Models, Chemical, Silicates, Cannabinoids, Health Policy, Morals, Deuterium Exchange Measurement, Peptides, Tandem Mass Spectrometry, Magnetic Resonance Imaging, Ophthalmoplegia, Pain, Skin, Tea Tree Oil, Cholesterol, ErbB Receptors, Peptides, Phosphatidylcholines, Sphingomyelins, DNA Breaks, Single-Stranded, DNA Repair",Missing,"sensor data collection for ambient intelligence in health-care settings rgb=red, green, blue analogue colour video signal.",N/A,No,No,N/A,N/A,N/A,N/A,N/A,No,No,N/A,Yes,10.2196/preprints.9423,2018/04/23,http://dx.doi.org/10.2196/preprints.9423,Journal of Medical Internet Research
21/5/2020,2020,10.1007/s10456-020-09727-9,"Chimerism, Endothelial Cells, Liver Neoplasms, Single-Cell Analysis, Transcriptome",Missing,"data availability software used this manuscript are publicly available, mentioned in the methods section. data generated from this study have been deposited to ncbi geo repository with accession number geo150226.",Method,Yes,Yes,Online,N/A,N/A,N/A,DA|Method|Fulltext,Yes,Yes,Online,No,N/A,N/A,N/A,N/A
23/6/2020,2020,10.3390/ijerph17124519,"Health Plan Implementation, Health Promotion, Health Workforce, Occupational Health, Power, Psychological",Missing,N/A,Method,Yes,No,N/A,N/A,N/A,N/A,N/A,No,No,N/A,No,N/A,N/A,N/A,N/A
21/8/2019,2019,10.7150/thno.34874,"GATA3 Transcription Factor, Hepatocyte Nuclear Factor 3-alpha",Missing,N/A,Method,Yes,No,N/A,N/A,N/A,N/A,Method|Fulltext,Yes,No,N/A,No,N/A,N/A,N/A,N/A
08/10/2020,2020,10.4102/safp.v62i1.5149,"Brain Injuries, Depression",Missing,data availability statement data is available upon request from the corresponding author.,Method,Yes,No,N/A,N/A,N/A,N/A,N/A,No,No,N/A,No,N/A,N/A,N/A,N/A
19/4/2021,2021,10.1038/s41598-021-87835-2,"Color Vision, Eye Movements, Reflex, Vestibulo-Ocular, Xenopus laevis",Missing,data availability the datasets generated and analyzed during the current study are available from the corresponding author on reasonable request.,Method,Yes,No,N/A,N/A,N/A,N/A,Method|Fulltext,Yes,No,N/A,No,N/A,N/A,N/A,N/A
03/08/2020,2020,10.1002/mgg3.1442,"COVID-19, Kidney Glomerulus, Kidney Tubules, Proximal, Receptors, Virus",Missing,"2.2 data sources gene expression matrix of normal human kidney were obtained from gene expression omnibus ( https://www.ncbi.nlm.nih.gov/geo/ ). scrna‐seq raw data were obtained from liao et al. ( 2020 ) (gse131685), containing 23,366 high‐quality cells from three normal human kidney samples.",Method,Yes,Yes,Online,https://www.ncbi.nlm.nih.gov/geo/,GSE131685,Gene Expression Omnibus,N/A,No,No,N/A,No,N/A,N/A,N/A,N/A
21/12/2019,2019,10.1186/s12913-019-4773-y,"General Practitioners, Low Back Pain, National Health Programs",Missing,"availability of data and materials the data that support the findings of this study are available from the australian government department of human services (dhs) but restrictions apply to the availability of these data, and so are not publicly available. requests for the data should be made directly to dhs.",Method,Yes,No,N/A,N/A,N/A,N/A,N/A,No,No,N/A,No,N/A,N/A,N/A,N/A
21/2/2019,2019,10.1038/s41598-019-39249-4,"Interleukin-1beta, Interleukin-6, Tumor Necrosis Factor-alpha",Missing,data availability the data from this study are available online ( https://figshare.com/s/33c072e600546dc1ba14 ).,Method,Yes,Yes,Supplementary Information|Online,"study.Gene/SNPsChr.SNPLocation, cohorts.Gene/haplotypeHan, populations.Gene/SNPsHan, status.Gene/SNPsGenetic, https://snpinfo.niehs.nih.gov/snpinfo/snpfunc.html, https://figshare.com/s/33c072e600546dc1ba14",N/A,figshare,N/A,No,No,N/A,No,N/A,N/A,N/A,N/A
25/6/2019,2019,10.1186/s12890-019-0880-0,"Disease Progression, Idiopathic Pulmonary Fibrosis, Vital Capacity",Missing,availability of data and materials all data generated or analysed during this study are included in this published article and its supplementary information files.,Method,Yes,Yes,Online,N/A,N/A,N/A,N/A,No,No,N/A,No,N/A,N/A,N/A,N/A
09/01/2021,2021,10.3390/ijerph18020499,"Fuel Oils, Polycyclic Aromatic Hydrocarbons, Strongylocentrotus, Water Pollutants, Chemical",Missing,data availability statement data sharing not applicable.,Method,Yes,Yes,Online,https://www.mdpi.com/1660-4601/18/2/499/s1,N/A,N/A,N/A,No,No,N/A,No,N/A,N/A,N/A,N/A
13/6/2019,2019,10.1186/s12905-019-0778-2,"Early Detection of Cancer, Patient Acceptance of Health Care, Rural Population",Missing,availability of data and materials the data sets used and/or analysed during the current study are available from the corresponding author upon reasonable request.,Method,Yes,No,N/A,N/A,N/A,N/A,N/A,No,No,N/A,No,N/A,N/A,N/A,N/A
25/5/2021,2021,10.1186/s12885-021-08322-5,"Bile Ducts, Intrahepatic, Biomarkers, Tumor, RNA, Long Noncoding",Missing,availability of data and materials the datasets downloaded for supporting the results of this article are publicly available at the tcga ( https://portal.gdc.cancer.gov/ ) and geo ( https://www.ncbi.nlm.nih.gov/geo/ ).,Method,Yes,Yes,Online,"https://www.ncbi.nlm.nih.gov/geo/, https://portal.gdc.cancer.gov/",N/A,Gene Expression Omnibus,Method|Fulltext,Yes,No,N/A,No,N/A,N/A,N/A,N/A
23/7/2019,2019,10.1038/s41467-019-11149-1,"Basic Helix-Loop-Helix Transcription Factors, Biological Evolution, Gene Duplication, Hypoxia-Inducible Factor 1, alpha Subunit, Von Hippel-Lindau Tumor Suppressor Protein",Missing,"data availability source data for figs.  1 a,  1 b,  2 b,  2 c,  2 d,  2 e,  3 a,  3 b,  3 c,  4 b,  4 c,  4 d,  4 e,  5 b,  5 c,  5 d,  5e , and supplementary figs.  1 a,  1 b,  1 c,  2 a,  2 b,  2 c,  4 a,  4 b,  5 ,  6b  are provided as a source data file. all data are available from the corresponding author upon reasonable request.",Method,Yes,Yes,Online,N/A,N/A,N/A,Method|Fulltext,Yes,No,N/A,No,N/A,N/A,N/A,N/A
24/3/2021,2021,10.1038/s41418-021-00771-6,"Acinar Cells, Cell Death, MDS1 and EVI1 Complex Locus Protein, Oncogenes",Missing,N/A,Method,Yes,Yes,Online,N/A,N/A,N/A,Method,Yes,No,N/A,Yes,10.1101/2020.08.21.260539,2020/08/24,http://dx.doi.org/10.1101/2020.08.21.260539,bioRxiv
16/6/2020,2020,10.1111/aji.13264,"Autoantibodies, HLA Antigens, Isoantibodies, Pregnancy",Missing,N/A,Method,Yes,No,N/A,N/A,N/A,N/A,N/A,No,No,N/A,No,N/A,N/A,N/A,N/A
10/7/2020,2020,10.1038/s41598-020-68151-7,"Deer, Geographic Information Systems, Predatory Behavior, Wolves",Missing,data availability the datasets generated during and/or analysed during the current study are available in the dryad repository ( https://doi.org/10.5061/dryad.djh9w0vxd ).,Method,Yes,Yes,Online,"10.5061/dryad.djh9w0vxd, https://doi.org/10.5061/dryad.djh9w0vxd",N/A,Dryad Digital Repository,Method,Yes,No,N/A,No,N/A,N/A,N/A,N/A
24/7/2019,2019,10.1128/mSphere.00443-19,"Cytokines, Gallium, HIV-1, Metal Nanoparticles, Mycobacterium tuberculosis",United States of America,N/A,Method,Yes,No,N/A,N/A,N/A,N/A,N/A,No,No,N/A,No,N/A,N/A,N/A,N/A
26/10/2021,2021,10.1038/s41598-021-00508-y,"Brain Mapping, Gender Dysphoria, Magnetic Resonance Imaging, Sex Reassignment Procedures, Transgender Persons, Transsexualism",Missing,N/A,Method,Yes,No,N/A,"https://cran.r-project.org/web/packages/ggpubr/index.html, http://www.rstudio.com/, https://www.nitrc.org/projects/surfice/, 10.6084/m9.figshare.14750841.v2",N/A,"Comprehensive R Archive Network, figshare",Method|Fulltext,Yes,No,N/A,Yes,10.21203/rs.3.rs-376858/v1,2021/04/06,http://dx.doi.org/10.21203/rs.3.rs-376858/v1,Research Square
15/11/2020,2020,10.3390/biom10111556,"Dietary Supplements, Plant Leaves, Plants, Medicinal",Missing,N/A,Method,Yes,Yes,Online,https://www.mdpi.com/2218-273x/10/11/1556/s1,N/A,N/A,Method,Yes,No,N/A,No,N/A,N/A,N/A,N/A
12/2/2020,2020,10.1186/s13059-020-1947-1,"Chickens, Gastrointestinal Microbiome, Genome, Bacterial, Metagenome",Missing,availability of data and materials the paired-read fastq files generated and analysed during the current study are available in the european nucleotide archive under project prjeb33338 [ 104 ]. mag fasta files are available in edinburgh datashare (10.7488/ds/2584).,Method,Yes,Yes,Supplementary Information|Online,10.7488/ds/2584,PRJEB33338,European Variation Archive,Method|Supplementary|Fulltext,Yes,No,N/A,Yes,10.1101/699843,2019/07/12,http://dx.doi.org/10.1101/699843,bioRxiv
16/9/2020,2021,10.1007/s00062-020-00955-6,"Diffusion Magnetic Resonance Imaging, Retinal Artery Occlusion",Missing,N/A,Method,Yes,No,N/A,N/A,N/A,N/A,N/A,No,No,N/A,No,N/A,N/A,N/A,N/A
15/2/2021,2021,10.3390/genes12020274,"Genetic Predisposition to Disease, Myosin VIIa",Missing,"data availability statement data is contained within the article and supplementary material, as well as in our previously published papers [ 69 , 70 , 95 ].",Method,Yes,Yes,Online,https://www.mdpi.com/2073-4425/12/2/274/s1,N/A,N/A,Method,Yes,No,N/A,No,N/A,N/A,N/A,N/A
21/4/2020,2020,10.1186/s12882-020-01803-y,"Bacterial Translocation, Biomarkers, Gastrointestinal Microbiome, Inflammation, Oxidative Stress, Renal Dialysis, Renal Insufficiency, Chronic",Missing,availability of data and materials the datasets used during the current study are available from the corresponding author on reasonable request.,Method,Yes,No,N/A,N/A,N/A,N/A,N/A,No,No,N/A,No,N/A,N/A,N/A,N/A
16/8/2021,2021,10.1016/j.vaccine.2021.07.001,"Foot-and-Mouth Disease, Foot-and-Mouth Disease Virus, Viral Vaccines",Missing,N/A,Method,Yes,No,N/A,N/A,N/A,N/A,Method|Supplementary,Yes,No,N/A,No,N/A,N/A,N/A,N/A
29/3/2020,2020,10.18632/aging.102985,"Alzheimer Disease, Amnion, Amyloid beta-Peptides, Epithelial Cells, Iridoid Glycosides, Microarray Analysis, Neuroprotective Agents",Missing,N/A,Method,Yes,Yes,Online,http://software.broadinstitute.org/gsea/index.jsp,N/A,N/A,Method|Fulltext,Yes,No,N/A,No,N/A,N/A,N/A,N/A
6/10/2021,2021,10.1186/s12903-021-01862-z,"Carcinoma, Squamous Cell, Head and Neck Neoplasms, Mouth Neoplasms",Missing,availability of data and materials the datasets used are available from the corresponding author on reasonable request.,Method,Yes,Yes,Online,N/A,N/A,N/A,Method|Supplementary,Yes,No,N/A,No,N/A,N/A,N/A,N/A
8/2/2022,2022,10.1186/s12873-022-00579-8,"Air Ambulances, Emergency Medical Services",Missing,availability of data and materials the datasets used and/or analysed during the current study available from the corresponding author on reasonable request.,Method,Yes,No,N/A,N/A,N/A,N/A,N/A,No,No,N/A,Yes,10.21203/rs.3.rs-778557/v1,2021/09/01,http://dx.doi.org/10.21203/rs.3.rs-778557/v1,Research Square
24/1/2022,2022,10.1007/s00604-022-05163-2,"Amoxicillin, Hot Temperature, Printing, Three-Dimensional",Missing,N/A,N/A,No,No,N/A,https://copper3d.com/,N/A,N/A,N/A,No,No,N/A,No,N/A,N/A,N/A,N/A
10/2021,2021,10.31557/APJCP.2021.22.10.3347,"Cyclin-Dependent Kinase Inhibitor p16, Germ-Line Mutation, Melanoma, Skin Neoplasms",Missing,N/A,Method,Yes,No,N/A,N/A,N/A,N/A,N/A,No,No,N/A,No,N/A,N/A,N/A,N/A
9/8/2019,2019,10.1242/dev.174789,"Drosophila Proteins, Drosophila melanogaster, Frizzled Receptors, Wings, Animal, Wnt Signaling Pathway, Wnt1 Protein",Missing,N/A,Method,Yes,No,N/A,N/A,N/A,N/A,N/A,No,No,N/A,Yes,10.1101/412627,2018/09/09,http://dx.doi.org/10.1101/412627,bioRxiv
1/3/2021,2021,10.1038/s41598-021-84605-y,"Anesthetics, Inhalation, Mucociliary Clearance",Missing,N/A,Method,Yes,No,N/A,N/A,N/A,N/A,N/A,No,No,N/A,Yes,10.21203/rs.3.rs-120324/v1,2020/12/22,http://dx.doi.org/10.21203/rs.3.rs-120324/v1,Research Square
16/9/2019,2019,10.1186/s12879-019-4342-3,"HIV, HIV Infections, Postnatal Care, Primary Health Care",Missing,availability of data and materials data are available from the authors upon request.,Method,Yes,Yes,Online,https://bmcinfectdis.biomedcentral.com/articles/supplements/volume-19-supplement-1,N/A,N/A,N/A,No,No,N/A,No,N/A,N/A,N/A,N/A
4/9/2020,2020,10.1186/s12917-020-02547-5,"Escherichia coli, Eugenia, Plant Leaves, Syzygium",Missing,availability of data and materials the datasets used and/or analysed during the current study are available from the corresponding author on reasonable request. the plant material collected from the botanical gardens is available from the corresponding author on reasonable request.,Method,Yes,No,N/A,N/A,N/A,N/A,N/A,No,No,N/A,Yes,10.21203/rs.2.14518/v3,2020/01/08,http://dx.doi.org/10.21203/rs.2.14518/v3,Research Square
26/8/2021,2021,10.1038/s41467-021-25265-4,None,Missing,"data availability the sequencing read data generated in this study have been deposited in the european nucleotide archive under study accession  prjeb34042 . the rsv genomic sequences generated in this study have been deposited in genbank under accession numbers  lr699315 lr699726 ,  lr699734 ,  lr699736-lr699744  and  mz515551-mz516143 . the rsv reference sequences used in this study are available in genbank under accession numbers  nc_038235  and  nc_001781 . the associated sample and de-identified clinical information used in this study is provided in supplementary data  1 .",Method,Yes,Yes,Supplementary Information|Online,N/A,PRJEB34042,European Variation Archive,Method,Yes,No,N/A,No,N/A,N/A,N/A,N/A
30/9/2020,2020,10.1038/s41598-020-73221-x,"Brain, Gray Matter, Happiness, Meditation, Neuronal Plasticity, Reward",Missing,N/A,Method,Yes,No,N/A,https://www.adobe.com/in/,N/A,N/A,Method,Yes,No,N/A,No,N/A,N/A,N/A,N/A
5/6/2020,2020,10.1186/s12976-020-00127-6,"Betacoronavirus, Disease Outbreaks, Models, Theoretical, Quarantine",Missing,"data sources data were obtained from the 2019-ncov global cases by the johns hopkins center for systems science and engineering [ 4 ] and novel coronavirus (2019-ncov) situation reports issued by the who [ 5 ] (last retrieved on february 7, 2020). all reported data were from confirmed covid-19 cases.|availability of data and materials collected datasets are publicly available from reference [ 8 ,  9 ].",Method,Yes,Yes,Online,N/A,N/A,N/A,Method,Yes,No,N/A,No,N/A,N/A,N/A,N/A
8/6/2020,2020,10.1080/01652176.2020.1773006,"Immunoglobulin Fc Fragments, Immunoglobulin G, Porcine epidemic diarrhea virus, Swine Diseases",Missing,N/A,Method,Yes,No,N/A,N/A,N/A,N/A,N/A,No,No,N/A,Yes,10.1101/2020.01.13.902841,2020/01/14,http://dx.doi.org/10.1101/2020.01.13.902841,bioRxiv
30/5/2019,2019,10.1038/s41598-019-44509-4,"Adiposity, Animal Husbandry, Retinol-Binding Proteins, Plasma",Missing,data availability supplemental data are provided with this paper. additional data and protocols are available on request via e-mail to the corresponding author.,Method,Yes,Yes,Online,N/A,N/A,N/A,Method|Fulltext,Yes,No,N/A,No,N/A,N/A,N/A,N/A
24/2/2021,2021,10.1186/s12964-020-00676-w,"Multiple Myeloma, Proto-Oncogene Proteins c-maf",Missing,availability of data and materials all data generated or analyzed during this study are included in this published article.,Method,Yes,Yes,Online,N/A,N/A,N/A,Method|Fulltext,Yes,No,N/A,Yes,10.21203/rs.3.rs-26509/v1,2020/05/08,http://dx.doi.org/10.21203/rs.3.rs-26509/v1,Research Square
2/9/2019,2019,10.1155/2019/8549727,"Biomarkers, Brain, Nickel, Oxidative Stress",Missing,data availability the data supporting the findings of our study are available within the article.,Method,Yes,No,N/A,N/A,N/A,N/A,N/A,No,No,N/A,No,N/A,N/A,N/A,N/A
29/1/2021,2021,10.1038/s41598-021-81987-x,"Attention, Communication, Eye-Tracking Technology, Fixation, Ocular, Interpersonal Relations",Missing,"data availability the datasets generated and analysed during the current studies are available in the open science framework (osf),  https://osf.io/mnyvf/?view_only=d75223a2f21f4c66ac8e6b91fe3dec57 .",Method,Yes,Yes,Online,https://osf.io/mnyvf/?view_only=d75223a2f21f4c66ac8e6b91fe3dec57,N/A,Open Science Framework,Method,Yes,No,N/A,Yes,10.31234/osf.io/nam3x,2021/08/03,http://dx.doi.org/10.31234/osf.io/nam3x,PsyArXiv
16/2/2022,2022,10.1038/s41598-022-06450-x,"Endothelium, Vascular, Manometry",Missing,data availability all data generated or analyzed during this study are included in the published article.,Method,Yes,No,N/A,N/A,N/A,N/A,Method|Fulltext,Yes,No,N/A,Yes,10.21203/rs.3.rs-1085344/v1,2021/12/01,http://dx.doi.org/10.21203/rs.3.rs-1085344/v1,Research Square
3/12/2021,2021,10.1038/s41467-021-27142-6,"Antineoplastic Agents, Neoplasms, Tumor Suppressor Protein p53",Missing,N/A,Method,Yes,Yes,Online,https://www.clinicaltrials.gov,N/A,N/A,DA|Method,Yes,Yes,Online,No,N/A,N/A,N/A,N/A
28/1/2022,2022,10.1155/2022/8159669,"Anisometropia, Asthenopia, Presbyopia",Missing,data availability the corresponding author has all data and could disclose upon appropriate request.,Method,Yes,No,N/A,N/A,N/A,N/A,Method|Fulltext,Yes,No,N/A,Yes,10.20944/preprints201912.0376.v1,2019/12/30,http://dx.doi.org/10.20944/preprints201912.0376.v1,Preprints.org
29/1/2022,2022,10.1186/s12876-022-02108-0,"Hepatitis B, Chronic",Missing,availability of data and materials the datasets used and/or analyzed during the current study are available from the corresponding author on reasonable request.,Method,Yes,Yes,Online,N/A,N/A,N/A,N/A,No,No,N/A,Yes,10.21203/rs.3.rs-964639/v1,2021/11/15,http://dx.doi.org/10.21203/rs.3.rs-964639/v1,Research Square
15/2/2021,2021,10.1186/s12917-021-02784-2,"Campylobacter, Drug Resistance, Microbial, Livestock, Rupicapra, Salmonella",Missing,availability of data and materials the datasets used and/or analysed during the current study are available from the corresponding author on reasonable request.,Method,Yes,No,N/A,N/A,N/A,N/A,N/A,No,No,N/A,No,N/A,N/A,N/A,N/A
22/6/2021,2021,10.1016/j.celrep.2021.109353,"Antibodies, Monoclonal, Antibodies, Neutralizing, COVID-19",Missing,materials availability this study did not generate new unique reagents|data and code availability the sequences for all mabs isolated in this study have been uploaded to genbank; cv1: genbank: mt462477 - genbank: mt462570; cv2: genbank: mw681614 - genbank: mw681759; cv3: genbank: mw681558 - genbank: mw681613; pcv: genbank: mw806097 - genbank: mw806188; and cn: mz151189 - mz151260. the structure of cv2-75 fab bound to sars-cov-2 rbd has been uploaded to the protein databank. pdb:  7m3i . other data will be made available upon request.,Method,Yes,Yes,N/A,N/A,N/A,N/A,DA|Method,Yes,No,N/A,Yes,10.1101/2021.03.23.436684,2021/03/24,http://dx.doi.org/10.1101/2021.03.23.436684,bioRxiv
5/12/2019,2019,10.1038/s41598-019-54851-2,"Kidney, Models, Biological, Peritoneal Dialysis",Missing,N/A,Method,Yes,No,N/A,N/A,N/A,N/A,Method|Fulltext,Yes,No,N/A,No,N/A,N/A,N/A,N/A
9/7/2019,2019,10.1186/s12989-019-0303-7,"Inhalation Exposure, Lung, Nanoparticles",Missing,availability of data and materials the raw/processed data required to reproduce these findings cannot be shared at this time due to technical or time limitations. details of the supplementary information associated with this paper are provided at the end of this manuscript document under “additional file  1 ”.,Method,Yes,Yes,Online,N/A,N/A,N/A,Method|Fulltext,Yes,No,N/A,No,N/A,N/A,N/A,N/A
14/8/2021,2021,10.3390/ijms22168741,"Brain-Derived Neurotrophic Factor, Chitosan, Enbucrilate, Induced Pluripotent Stem Cells, Nanoparticles, Transfection",Missing,data availability statement not applicable.,Method,Yes,No,N/A,N/A,N/A,N/A,N/A,No,No,N/A,No,N/A,N/A,N/A,N/A
14/12/2020,2020,10.3390/ijerph17249345,"Air Pollutants, Environmental Monitoring, Fires, Models, Statistical, Particulate Matter, Wildfires",Missing,N/A,Method,Yes,Yes,Online,https://www.mdpi.com/1660-4601/17/24/9345/s1,N/A,N/A,Method,Yes,No,N/A,Yes,10.21203/rs.3.rs-41720/v1,2020/07/22,http://dx.doi.org/10.21203/rs.3.rs-41720/v1,Research Square
19/2/2020,2020,10.3390/molecules25040938,"Molecular Docking Simulation, Molecular Dynamics Simulation, Protein Kinase Inhibitors, Proto-Oncogene Proteins c-met",Missing,N/A,Method,Yes,No,N/A,N/A,N/A,N/A,Method,Yes,No,N/A,No,N/A,N/A,N/A,N/A
24/10/2021,2021,10.1186/s13018-021-02798-4,"Spinal Diseases, Spinal Fusion",Missing,availability of data and materials the datasets generated and/or analyzed during the current study are available from the corresponding author on reasonable request.,Method,Yes,No,N/A,N/A,N/A,N/A,N/A,No,No,N/A,No,N/A,N/A,N/A,N/A
26/6/2021,2022,10.3758/s13428-021-01644-z,"Psychosocial Intervention, Research Design",Missing,"data availability all materials, data, and analysis script coded have been made publicly available on the open science framework:  https://osf.io/xg97b/ . additionally, a code ocean capsule reproducing the reported results is available at: 10.24433/co.6211364.v1",Method,Yes,Yes,Online,"https://osf.io/xg97b/, https://osf.io/5nk92/.The, https://osf.io/9xsg2/Table, https://osf.io/5nk92/.Again, 10.24433/co.6211364.v1, https://osf.io/",N/A,Open Science Framework,DA|Method|Fulltext,Yes,Yes,Online,Yes,10.31234/osf.io/dz8cm,2021/02/17,http://dx.doi.org/10.31234/osf.io/dz8cm,PsyArXiv
7/9/2020,2020,10.1186/s12974-020-01934-x,"Interferon Type I, Microglia, Neurons, Signal Transduction",Missing,"availability of data and materials the rnaseq dataset generated during the current study was deposited in the gene expression omnibus (geo) database,  http://www.ncbi.nlm.nih.gov/geo  (accession no. gse150266).",Method,Yes,Yes,Online,http://www.ncbi.nlm.nih.gov/geo,GSE150266,Gene Expression Omnibus,Method|Fulltext,Yes,No,N/A,No,N/A,N/A,N/A,N/A
26/6/2020,2020,10.1186/s12862-020-01639-y,"Genetic Variation, Genome, Mitochondrial, Phenotype, Sciuridae",Missing,availability of data and materials the datasets generated and analyzed during the current study are available in the dryad digital repository (10.5061/dryad.9w0vt4bc9). genbank accession numbers are provided for all complete mitochondrial genomes in the additional file  6 .,Method,Yes,Yes,Online,"10.5061/dryad.9w0vt4bc9, http://qgis.org",N/A,Dryad Digital Repository,Method,Yes,No,N/A,Yes,10.21203/rs.3.rs-28614/v1,2020/05/14,http://dx.doi.org/10.21203/rs.3.rs-28614/v1,Research Square
02/10/2021,2021,10.3390/s21196597,"Gait, Gait Analysis",Missing,data availability statement this research has been conducted with previously published dataset [ 42 ].,Method,Yes,No,N/A,N/A,N/A,N/A,DA|Method|Fulltext,Yes,No,N/A,No,N/A,N/A,N/A,N/A
17/12/2019,2019,10.1038/s41598-019-55502-2,"Antimicrobial Cationic Peptides, Calgranulin A, Sputum",Missing,data availability the data used to support the findings of this study are included within the article.,Method,Yes,Yes,Online,N/A,N/A,N/A,N/A,No,No,N/A,No,N/A,N/A,N/A,N/A
7/6/2019,2019,10.2196/13693,"Medical Informatics, Physician-Patient Relations",China,"data collection given china has the largest population of internet users, we collected data from china [ 32 ]. to access to users of web-based health communities efficiently, we employed the paid survey service from a leading online market research company. the service of market research firms allows for the efficiently administering online surveys and recruiting voluntary, motivated, and willing research participants for different research purposes [ 33 ]. this company has a sampling base that contained 2.6 million members, and more than 1 million of them were the daily questionnaire respondents. given the objective of this study is to investigate patients’ intention to interact with doctors in web-based health communities, respondents with experience of interacting with doctors in web-based health communities were randomly invited to fill out our questionnaires randomly from the sample base. the institutional review board of tongji medical college, huazhong university of science and technology has approved our study procedures (no 2017s319). through 3 weeks of deployment, we received a total of 427 responses. to ensure the data quality and reduce social desirability bias, several actions are taken during the data collection. first, attention-trap and reverse-coded questions were used in the questionnaire to reduce single-method bias and check whether respondents were reading all questions fully and honestly. second, several screening questions were set to check whether the respondents were patients who interacted with doctors in web-based health communities such as whether the respondents had interacted with doctors in web-based health communities, which web-based health communities’ respondents used most, and whether respondents were the members of web-based health communities. finally, the cases with missing values or similar values for all questions were discarded. almost 93 answers were excluded, which leaves 334 valid responses. therefore, the percent of invalid responses is 27.8% (93/334), which is reasonable [ 34 ].",Method,Yes,No,N/A,N/A,N/A,N/A,N/A,No,No,N/A,Yes,10.2196/preprints.13693,2019/02/21,http://dx.doi.org/10.2196/preprints.13693,Journal of Medical Internet Research
20/11/2019,2019,10.1038/s41598-019-53645-w,"Biomarkers, Dengue, Dengue Virus, West Nile Fever, West Nile virus, Zika Virus, Zika Virus Infection",Missing,data availability the datasets generated during and/or analysed during the current study are available from the corresponding author on reasonable request.,Method,Yes,Yes,Online,N/A,N/A,N/A,Method|Fulltext,Yes,No,N/A,No,N/A,N/A,N/A,N/A
06/10/2021,2021,10.3390/s21196637,"Acceleration, Micro-Electrical-Mechanical Systems",Missing,data availability statement the validation data used to support the findings of this study are available from the corresponding author upon request.,N/A,No,No,N/A,N/A,N/A,N/A,Method|Fulltext,Yes,No,N/A,No,N/A,N/A,N/A,N/A
06/01/2020,2020,10.3390/md18010042,None,Missing,N/A,Method,Yes,No,N/A,N/A,N/A,N/A,N/A,No,No,N/A,No,N/A,N/A,N/A,N/A
21/1/2022,2022,10.1186/s12978-022-01324-x,"Family Planning Services, Rural Population",Missing,availability of data and materials data will be available upon request to the corresponding author.,Method,Yes,No,N/A,N/A,N/A,N/A,N/A,No,No,N/A,No,N/A,N/A,N/A,N/A
29/5/2019,2019,10.1017/S0950268819000888,"Autopsy, Diagnostic Tests, Routine, Tuberculin Test, Tuberculosis, Bovine",Missing,"data collection and definition of variables all data were extracted from the animal and public health information system (aphis) of the department of agriculture, environment and rural affairs (daera). details on all individual cattle, cattle movements and btb tests conducted since 1988 are stored in this database [ 14 ]. datasets were manipulated using microsoft access™ (microsoft corporation, usa) and subsequently analysed using r version 3.2.3 (the r foundation for statistical computing) and jags version 4.1.0 ( http://citeseerx.ist.psu.edu/viewdoc/summary?doi=10.1.1.13.3406 ). data included in the analyses were based on information at animal level and test level. the data presented at animal level included individual measures on breed, sex, age at death, days from last sicct test to slaughter and last sicct test reason. the days from the last sicct test was included in order to take account of animals with their last sicct test being negative becoming infected before being slaughtered (i.e. to account for the fact that the two tests (sicct and post-mortem) are non-contemporaneous). breeds were categorised as breeds mainly kept for milk production (dairy) and non-dairy breeds. in relation to sex, three categories were constructed: female, non-castrated male (bull) and castrated male (bullock). age at death was entered into the model as a continuous variable. the last sicct test reason (i.e. the reason for the last sicct test being conducted prior to slaughter) was divided into three categories; i.e. routine (in situations where no risk of btb infection was suspected to be in the herd), at risk (in situations where the herd/animal was at increased risk of having btb infection) and restricted (in situations where sicct test reactors or animals with lesions at routine slaughter were found or the herd was at high risk of having btb infection) [ 5 ]. the duration in days from the last sicct test to slaughter was not included in the final animal-level model as reasoning from a biological perspective suggests that the fact that the two tests are non-contemporaneous should not matter in the case of btb. it is estimated that the time period from the point of infection to reactivity to the sicct test is approximately 2–3 weeks [ 15 ]. thereafter btb develops into a chronic infection with the formation of granulomata with variation in the immune responses over time (based on intermittent flare ups caused by the dynamics between the infection and body's immune system) followed by the animal having a lifelong infection compared to a very small window of the incubation period where detection would be missed. furthermore, the minimum sicct testing interval in northern ireland is 2 months with the median being much higher over the population being monitored. animals also have to be at least 18 months before they are slaughtered (unless they are found to be sictt reactor before that). in order to check the validity of this reasoning, we ran the animal-level model in two ways: (1) based only on cattle that had ⩽45 days from the last sicct test to slaughter; (2) based only on cattle that had ⩽23 days from the last sicct test to slaughter. the data presented at test level were based on the test-related information of the last sicct test the animal was subjected to prior to slaughter and the tests after slaughter (including the post-mortem inspection result in the abattoir, the histology test and the bacteriological culture test) [ 15 ]. the interpretation of the sicct test was based on recorded measurements of the net bovine rise (nbr), calculated as the increase (in millimetres) at the bovine tuberculin (lelystad) injection site greater than any increase at the avian tuberculin injection site when measured after 72 h (as per eu council directive 64/432/eec, annex b). a standard interpretation is read where the thickness at the site of injection of the bovine antigen is generally greater than the site of injection of the avian antigen by more than 4 mm. a severe interpretation is generally one in which the bovine bias is 3–4 mm [ 13 ]. cattle in the dataset were slaughtered in one of 10 abattoirs in 2015. however, as practically all sicct test reactors were slaughtered in one slaughter house (abattoir e), posterior estimates of test characteristics were obtained on both the entire dataset and data from animals slaughtered in abattoir e only. background analysis of lesion distributions between abattoir e and all other abattoirs were conducted in order to assess bias in relation to post-mortem examination techniques between abattoir e and the other abattoirs.",Method,Yes,Yes,Online,"http://citeseerx.ist.psu.edu/viewdoc/summary?doi=10.1.1.13.3406, https://doi.org/10.1017/s0950268819000888, 10.1017/s0950268819000888",N/A,N/A,DA,Yes,No,N/A,No,N/A,N/A,N/A,N/A
4/11/2019,2020,10.1007/s10802-019-00594-7,"Child Behavior, Facial Recognition, Problem Behavior, Social Behavior, Social Perception, Theory of Mind",Missing,N/A,Method,Yes,No,N/A,N/A,N/A,N/A,N/A,No,No,N/A,No,N/A,N/A,N/A,N/A
13/1/2020,2020,10.1186/s12872-019-01316-z,"Blood Platelets, Caffeic Acids, Lactates, Platelet Aggregation",Missing,availability of data and materials datasets are available from the corresponding author upon reasonable request.,Method,Yes,No,N/A,N/A,N/A,N/A,N/A,No,No,N/A,No,N/A,N/A,N/A,N/A
19/3/2021,2021,10.1038/s42003-021-01893-w,"Actin Cytoskeleton, Actins, Muscle Development, Myocytes, Cardiac, Myofibrils",Missing,data collection imagej version 1.52 (nih) was used for collecting data from sds–page or nondenaturing-page gels and images of cardiac actin immunostain. zen software 2.3 blue edition (zeiss) was used for acquiring super-resolution microscopy data. image j version 1.52 ddecon plug-in was used for thin filament length measurements. data from immunoblot membranes were collected using image studio lite version 5.2.5 (li-cor biosciences). frap data were acquired with leica las x 3.4.2.18368. echocardiography data were collected with vevo lab 3.2.6 (visualsonics).|data availability the datasets generated during and/or analyzed during the current study are available from the corresponding author on reasonable request. source data for main figures can be found in supplementary data  1 .,Method,Yes,Yes,Supplementary Information|Online,N/A,N/A,N/A,DA|Method|Fulltext,Yes,Yes,Online,No,N/A,N/A,N/A,N/A
13/10/2021,2021,10.3390/nu13103580,"Cognition, Feeding Behavior, Nuts",Missing,"data availability statement the current research uses data from the qatar biobank study. data described in the manuscript, and code book are available by submitting a request to qatar biobank study management team at  https://www.qatarbiobank.org.qa/  (accessed on 10 september 2021).",Method,Yes,Yes,Online,"10.3390/nu13103580/s1, https://www.qatarbiobank.org.qa/, https://www.mdpi.com/article/10.3390/nu13103580/s1",N/A,N/A,DA,Yes,Yes,Online,No,N/A,N/A,N/A,N/A
17/4/2021,2021,10.1038/s41398-021-01348-0,"Depressive Disorder, Major, Genome-Wide Association Study",Missing,code availability the r and shell scripts used for the analyses are available from the corresponding authors on reasonable request.|data availability all data generated or analyzed during this study are included in this published article and its supplementary information files.,Method,Yes,Yes,Online,N/A,N/A,N/A,DA|Method,Yes,Yes,Online,Yes,10.1101/2020.10.25.20219188,2020/10/27,http://dx.doi.org/10.1101/2020.10.25.20219188,medRxiv
4/5/2021,2021,10.1128/mBio.00658-21,"Fungal Proteins, Signal Transduction, Sordariales",Germany,data availability. all targeted proteomics data and raw files are available through the panorama repository ( 55 ) under the data set identifier pxd023130 and via  https://panoramaweb.org/smkin3.url .,Method,Yes,Yes,Online,"https://panoramaweb.org/smkin3.url, http://www.ch.embnet.org/software/COILS_form.html",PXD023130,PRIDE Archive,Method|Fulltext,Yes,No,N/A,Yes,10.1101/2020.12.17.423311,2020/12/22,http://dx.doi.org/10.1101/2020.12.17.423311,bioRxiv
18/6/2021,2021,10.1186/s12872-021-02124-0,Hospitalization,Missing,availability of data and materials the datasets used and analysed during the current study (deidentified participant data) are available on reasonable request from the corresponding author.,Method,Yes,Yes,Online,N/A,N/A,N/A,Method,Yes,No,N/A,No,N/A,N/A,N/A,N/A
3/8/2020,2021,10.1007/s12265-020-10063-y,"1-Naphthylamine, Cross-Linking Reagents, Extracellular Matrix, Extracellular Matrix Proteins, Naphthalimides, Popliteal Artery, Quinolones",Missing,N/A,Method,Yes,No,N/A,N/A,N/A,N/A,Method|Fulltext,Yes,No,N/A,No,N/A,N/A,N/A,N/A
20/4/2020,2020,10.1038/s42003-020-0920-6,"Autophagy, Autophagy-Related Proteins, Mutation, Missense, Mycobacterium ulcerans, Polymorphism, Single Nucleotide, RNA, Long Noncoding",Missing,"data availability the data that support the findings of this study are available within the paper and its  supplementary information  files. gwas summary statistics for the two phenotypes studied, and source data for generating fig.  5  are available at 10.6084/m9.figshare.11941344. all other relevant data are available from j.m. (jeremy.manry@inserm.fr) and l.a. (laurent.abel@inserm.fr) upon request.",Method,Yes,Yes,Supplementary Information|Online,10.6084/m9.figshare.11941344,N/A,figshare,Method,Yes,No,N/A,Yes,10.1101/19012096,2019/11/15,http://dx.doi.org/10.1101/19012096,medRxiv
29/5/2021,2021,10.1155/2021/6640254,"Radiographic Image Interpretation, Computer-Assisted, Spinal Neoplasms, Tuberculosis, Spinal",Missing,data availability the clinical data in this study is available from the corresponding author on reasonable request.,Method,Yes,No,N/A,N/A,N/A,N/A,N/A,No,No,N/A,No,N/A,N/A,N/A,N/A
3/3/2020,2020,10.1038/s41598-020-60630-1,"Fishes, Microplastics, Water Pollutants, Chemical",Missing,data availability the datasets generated during and/or analysed during the current study are available from the corresponding author on reasonable request.,Method,Yes,Yes,Online,N/A,N/A,N/A,Method|Fulltext,Yes,No,N/A,No,N/A,N/A,N/A,N/A
4/2/2019,2019,10.1186/s12859-018-2547-x,"Algorithms, Amino Acids, Computational Biology",Missing,availability of data and materials the datasets used and analysed during the current study are publically available online at  https://github.com/hamenreddy/glystruct  or  www.alok-ai-lab.com .,Method,Yes,Yes,Online,"https://bmcbioinformatics.biomedcentral.com/articles/supplements/volume-19-supplement-13, https://github.com/hamenreddy/glystruct, www.alok-ai-lab.com",N/A,"Github, bmcbioinformatics.biomedcentral.com",N/A,No,Yes,Online,No,N/A,N/A,N/A,N/A
21/1/2022,2022,10.3390/ijms23031192,"Buprenorphine, Fentanyl, Morphine, Severity of Illness Index",Missing,data availability statement the datasets generated during and/or analyzed during the current study are available from the corresponding author on reasonable request.,Method,Yes,Yes,Online,"10.3390/ijms23031192/s1, https://www.mdpi.com/article/10.3390/ijms23031192/s1",N/A,N/A,N/A,No,No,N/A,No,N/A,N/A,N/A,N/A
10/3/2021,2021,10.3390/v13030443,"Hemorrhagic Fever with Renal Syndrome, Rodent Diseases",Missing,data availability statement data is contained within the article.,Method,Yes,No,N/A,N/A,N/A,N/A,Method,Yes,No,N/A,No,N/A,N/A,N/A,N/A
9/2020,2020,10.31557/APJCP.2020.21.9.2723,"Antineoplastic Combined Chemotherapy Protocols, Neoadjuvant Therapy, Obesity",Missing,N/A,Method,Yes,No,N/A,N/A,N/A,N/A,N/A,No,No,N/A,No,N/A,N/A,N/A,N/A
6/11/2020,2020,10.1038/s41598-020-76186-z,"Bacterial Proteins, Burkholderia pseudomallei, Melioidosis, Type C Phospholipases, Virulence Factors",Missing,N/A,Method,Yes,No,N/A,www.graphpad.com,N/A,N/A,N/A,No,No,N/A,No,N/A,N/A,N/A,N/A
26/7/2019,2019,10.1001/jamanetworkopen.2019.7850,"Antipsychotic Agents, Attention Deficit Disorder with Hyperactivity, Central Nervous System Stimulants, Drug Prescriptions, Mental Disorders",Missing,"data source data were obtained from the truven health marketscan database of commercially insured individuals from january 1, 2010, to december 31, 2015. this database comprises medical and prescription drug data for more than 115 million enrollees, including demographic characteristics, outpatient and inpatient service codes, diagnostic codes, and detailed pharmacy files. 28  the data were deidentified and the study was determined to be exempt from human subjects review by the rutgers university institutional review board. this study followed the strengthening the reporting of observational studies in epidemiology ( strobe ) reporting guideline for cohort studies.",Method,Yes,No,N/A,N/A,N/A,N/A,DA|Method,Yes,No,N/A,No,N/A,N/A,N/A,N/A
10/9/2021,2021,10.1186/s13148-021-01164-9,"DNA Methylation, Epigenesis, Genetic, Fetal Growth Retardation, Infant, Premature, Prenatal Exposure Delayed Effects",Missing,availability of data and materials the raw and processed dnam data are publicly accessible through ncbi gene expression omnibus (geo) via accession series gse128821.,Method,Yes,Yes,Online,http://han-lab.org/methylation/default/imageCpG,GSE128821,Gene Expression Omnibus,N/A,No,No,N/A,Yes,10.31234/osf.io/eqjcm,2021/05/27,http://dx.doi.org/10.31234/osf.io/eqjcm,PsyArXiv
19/8/2020,2020,10.1038/s41598-020-70795-4,"Haplotypes, Hemiptera, Insect Vectors, Lycopersicon esculentum",Missing,N/A,Method,Yes,No,N/A,N/A,N/A,N/A,Method,Yes,No,N/A,No,N/A,N/A,N/A,N/A
12/9/2019,2019,10.3390/ijerph16183382,"Automobile Driving, Automobiles, Cognition, Magnetic Fields, Reaction Time",Missing,N/A,Method,Yes,No,N/A,N/A,N/A,N/A,Method,Yes,No,N/A,No,N/A,N/A,N/A,N/A
05/03/2019,2019,10.3390/molecules24050905,"Acetylcysteine, Recombinant Proteins, Superoxide Dismutase, Surface-Active Agents",Missing,N/A,Method,Yes,No,N/A,N/A,N/A,N/A,Method|Fulltext,Yes,No,N/A,No,N/A,N/A,N/A,N/A
06/01/2019,2019,10.3390/molecules24010190,"Carbohydrate Metabolism, Diabetes Mellitus, Type 2, Hydrogen Sulfide, Obesity",Missing,N/A,Method,Yes,No,N/A,N/A,N/A,N/A,Method|Fulltext,Yes,No,N/A,No,N/A,N/A,N/A,N/A
27/2/2021,2021,10.1186/s12934-021-01548-9,"Gastrointestinal Microbiome, Metabolic Syndrome, Pediatric Obesity",Missing,"availability of data and materials the original contributions presented in the study are publicly available. the raw sequence data reported in this paper have been deposited in the genome sequence archive (genomics, proteomics & bioinformatics 2017) in national genomics data center (nucleic acids res 2020), beijing institute of genomics (china national center for bioinformation), chinese academy of sciences, under accession number cra003010 that are publicly accessible at  https://bigd.big.ac.cn/gsa .",Method,Yes,Yes,Online,https://bigd.big.ac.cn/gsa,N/A,N/A,N/A,No,No,N/A,Yes,10.21203/rs.3.rs-127205/v2,2021/02/11,http://dx.doi.org/10.21203/rs.3.rs-127205/v2,Research Square
30/8/2019,2019,10.3390/cells8091009,"Cryopreservation, M Phase Cell Cycle Checkpoints, Melatonin, Oocytes",Missing,N/A,Method,Yes,No,N/A,N/A,N/A,N/A,N/A,No,No,N/A,No,N/A,N/A,N/A,N/A
01/04/2019,2019,10.5195/jmla.2019.577,"Biomedical Engineering, Economics, Medical, Entrepreneurship, Information Literacy",Missing,N/A,Method,Yes,No,N/A,N/A,N/A,N/A,N/A,No,No,N/A,Yes,10.31229/osf.io/n9bp5,2018/07/02,http://dx.doi.org/10.31229/osf.io/n9bp5,N/A
27/3/2020,2020,10.1038/s41598-020-62120-w,"Bisacodyl, Citrates, Citric Acid, Colon, Organometallic Compounds, Picolines, Polyethylene Glycols",Missing,N/A,Method,Yes,No,N/A,N/A,N/A,N/A,Method,Yes,No,N/A,No,N/A,N/A,N/A,N/A
15/7/2021,2021,10.1002/jaba.863,"Machine Learning, Research Design",Missing,N/A,Method,Yes,Yes,Online,https://labrl.shinyapps.io/singlecaseanalysis/,N/A,N/A,Method,Yes,No,N/A,Yes,10.31234/osf.io/b2sq7,2021/01/13,http://dx.doi.org/10.31234/osf.io/b2sq7,PsyArXiv
18/8/2020,2020,10.1155/2020/8842362,"Cholesterol, Cholesterol, HDL, Cholesterol, LDL",Missing,data availability all relevant data are within the paper.,Method,Yes,No,N/A,N/A,N/A,N/A,N/A,No,No,N/A,No,N/A,N/A,N/A,N/A
27/8/2020,2020,10.3390/ijms21176216,"Antimicrobial Cationic Peptides, Coleoptera, Defensins, Escherichia coli Infections, Lipopolysaccharides",Missing,N/A,Method,Yes,No,N/A,N/A,N/A,N/A,N/A,No,No,N/A,No,N/A,N/A,N/A,N/A
24/12/2019,2019,10.1038/s41598-019-56381-3,"Cytokines, Dengue Virus, Leukocytes, Mononuclear",Missing,data availability all data generated or analyzed during this study are included in this published article.,Method,Yes,No,N/A,N/A,N/A,N/A,N/A,No,No,N/A,No,N/A,N/A,N/A,N/A
13/10/2021,2021,10.1038/s42003-021-02690-1,"CRISPR-Cas Systems, Integrases, Introns",Missing,data availability the datasets generated and/or analyzed during the current study not included in this published article (and its supplementary information files) are available from the corresponding author on reasonable request.,Method,Yes,Yes,Online,N/A,N/A,N/A,N/A,No,No,N/A,No,N/A,N/A,N/A,N/A
26/4/2021,2021,10.7554/eLife.58361,"Coronary Artery Disease, Lipoproteins, Polymorphism, Single Nucleotide",United Kingdom,data availability gwas data used in the data are publicly available. details can be found in table 1.,Method,Yes,No,N/A,N/A,N/A,N/A,Method,Yes,No,N/A,Yes,10.1101/691089,2019/07/03,http://dx.doi.org/10.1101/691089,bioRxiv
19/12/2019,2019,10.1186/s12913-019-4832-4,"Ambulatory Care, Cardiology, General Practitioners",Missing,availability of data and materials the datasets used and analyzed during the current study are available from the corresponding author on reasonable request.,Method,Yes,Yes,Online,N/A,N/A,N/A,N/A,No,Yes,Online,No,N/A,N/A,N/A,N/A
6/5/2020,2020,10.1186/s13002-020-00373-5,"Bibliometrics, Education, Knowledge, Schools",Missing,availability of data and materials data sets analyzed as part of the current study are available from the corresponding author upon request.,Method,Yes,No,N/A,N/A,N/A,N/A,N/A,No,No,N/A,No,N/A,N/A,N/A,N/A
19/12/2019,2019,10.18632/aging.102589,"Adult Germline Stem Cells, Genetic Predisposition to Disease, Infertility, Male",Missing,N/A,Method,Yes,No,N/A,N/A,N/A,N/A,N/A,No,No,N/A,No,N/A,N/A,N/A,N/A
05/03/2020,2020,10.1002/mgg3.1201,"Amlodipine, Calcium Channel Blockers, Cytochrome P-450 CYP3A, Pharmacogenomic Variants, Polymorphism, Single Nucleotide",Missing,N/A,Method,Yes,No,N/A,N/A,N/A,N/A,N/A,No,No,N/A,No,N/A,N/A,N/A,N/A
03/11/2020,2020,10.4269/ajtmh.20-1262,"COVID-19, Colitis, Ischemic, SARS-CoV-2",Missing,N/A,N/A,No,No,N/A,N/A,N/A,N/A,N/A,No,No,N/A,No,N/A,N/A,N/A,N/A
20/1/2019,2019,10.1155/2019/5678548,"Bone Matrix, Carnitine, Cell Differentiation, Osteoblasts, Oxidative Stress",Missing,data availability the experimental data used to support the findings of this study are included within the article.,Method,Yes,No,N/A,N/A,N/A,N/A,Method|Fulltext,Yes,No,N/A,No,N/A,N/A,N/A,N/A
5/11/2020,2020,10.1172/jci.insight.125940,"Immunoglobulin J Recombination Signal Sequence-Binding Protein, Receptors, Notch",Missing,N/A,Method,Yes,Yes,Online,10.1172/jci.insight.125940DS1,N/A,N/A,Method|Fulltext,Yes,No,N/A,No,N/A,N/A,N/A,N/A
21/1/2021,2021,10.1038/s41598-021-81548-2,"Circadian Rhythm, Memory, Receptors, Nicotinic, Sleep",Missing,"data availability the datasets generated during and/or analysed during the current study are available in the mendeley data repository, under ‘neonicotinoids disrupt memory, circadian behaviour and sleep, tasman et al.’,  https://doi.org/10.17632/d28dk6znm6.1",Method,Yes,Yes,Online,"https://doi.org/10.17632/d28dk6znm6.1, 10.17632/d28dk6znm6.1",N/A,Mendeley Data,Method,Yes,No,N/A,Yes,10.1101/2020.04.07.030171,2020/04/09,http://dx.doi.org/10.1101/2020.04.07.030171,bioRxiv
09/02/2020,2020,10.1111/joim.13027,"DNA Copy Number Variations, DNA, Mitochondrial",Missing,N/A,Method,Yes,No,N/A,N/A,N/A,N/A,Fulltext,Yes,No,N/A,No,N/A,N/A,N/A,N/A
06/01/2022,2022,10.3390/s22020410,"Computer Security, Wireless Technology",Missing,data availability statement not applicable.,Method,Yes,Yes,Online,www.france98.com,N/A,N/A,N/A,No,No,N/A,No,N/A,N/A,N/A,N/A
13/2/2019,2019,10.3390/molecules24040659,"Cannabis, Medical Marijuana, Proteomics",Missing,N/A,Method,Yes,Yes,Online,"http://www.unodc.org, www.legislation.gov.au, https://opencannabisproject.org, www.tga.gov.au, www.odc.gov.au",WWW2.HEALTH.VIC.GOV.AU,N/A,N/A,No,No,N/A,No,N/A,N/A,N/A,N/A
2/3/2021,2021,10.1186/s12906-021-03256-8,"Complementary Therapies, Health Knowledge, Attitudes, Practice, Patient Satisfaction, Pharmacies, Pharmacists, Professional Role",Missing,availability of data and materials the datasets used and analyzed during the current study are available from the corresponding author on reasonable request.,Method,Yes,Yes,Online,N/A,N/A,N/A,N/A,No,No,N/A,Yes,10.21203/rs.3.rs-47620/v1,2020/07/23,http://dx.doi.org/10.21203/rs.3.rs-47620/v1,Research Square
15/4/2021,2021,10.3390/nu13041310,"Health Behavior, Life Style, Maternal Behavior, Postpartum Period, Prenatal Care",Missing,data availability statement the datasets used and analysed during the current study are available from the corresponding author on reasonable request.,Method,Yes,Yes,Online,"10.3390/nu13041310/s1, https://www.mdpi.com/article/10.3390/nu13041310/s1",N/A,N/A,DA,Yes,Yes,Online,No,N/A,N/A,N/A,N/A
30/11/2019,2019,10.1186/s12199-019-0824-6,None,Missing,availability of data and materials data will be made available upon requesting the primary author.,Method,Yes,No,N/A,N/A,N/A,N/A,N/A,No,No,N/A,Yes,10.1101/493916,2018/12/11,http://dx.doi.org/10.1101/493916,bioRxiv
17/5/2021,2021,10.1186/s12888-021-03254-7,"Psychological Distress, Sleep Initiation and Maintenance Disorders",Missing,availability of data and materials the datasets used and/or analysed during the current study are available from the corresponding author on reasonable request.,Method,Yes,No,N/A,N/A,N/A,N/A,N/A,No,No,N/A,Yes,10.21203/rs.3.rs-36226/v1,2020/06/29,http://dx.doi.org/10.21203/rs.3.rs-36226/v1,Research Square
7/4/2021,2021,10.1186/s12864-021-07546-w,"Chiroptera, Streptomyces",Missing,availability of data and materials genome sequence data of the 73 isolates have been deposited in the ncbi sequence read archive under bioproject id prjna673820 with biosample accession numbers listed in additional file  1 : table s1. the raw data in the ncbi database serve as an acceptable repository by u.s. geological survey’s standards.,Method,Yes,Yes,Online,N/A,PRJNA673820,NCBI Bioproject,Method|Supplementary|Fulltext,Yes,No,N/A,No,N/A,N/A,N/A,N/A
21/9/2019,2019,10.3390/medicina55100619,"Electric Stimulation Therapy, Exercise Therapy, Muscle Tonus, Postural Balance, Sitting Position",Missing,N/A,Method,Yes,No,N/A,N/A,N/A,N/A,Method|Fulltext,Yes,No,N/A,No,N/A,N/A,N/A,N/A
20/5/2021,2021,10.3390/ijerph18105460,"Athletic Injuries, Musculoskeletal Pain",Missing,"data availability statement the datasets used and/or analysed during the current study will be made available upon reasonable request to the corresponding author, g.f.",Method,Yes,No,N/A,N/A,N/A,N/A,N/A,No,No,N/A,No,N/A,N/A,N/A,N/A
9/4/2019,2019,10.1155/2019/1021408,"Burnout, Professional, Job Satisfaction, Perception, School Teachers",Missing,data availability the data used to support the findings of this study are available from the corresponding author upon request.,Method,Yes,No,N/A,N/A,N/A,N/A,N/A,No,No,N/A,No,N/A,N/A,N/A,N/A
16/12/2020,2021,10.1038/s41586-020-03043-4,"Developed Countries, Geographic Mapping, Measles, Vaccination",Missing,"code availability this study is compliant with the gather recommendations 51 ; as such, all computer code is available from github ( https://github.com/ihmeuw/lbd/tree/mcv1-lmic-2020 ). all maps and figures presented in this study are generated by the authors using rstudio (r version 3.6.1), arcgis desktop 10.6 and python 2.7.",Method,Yes,Yes,Online,"http://ghdx.healthdata.org/lbd-publication-data-input-sources, https://vizhub.healthdata.org/lbd/mcv, https://github.com/ihmeuw/lbd/tree/mcv1-lmic-2020",N/A,Github,DA|Method,Yes,Yes,Online,No,N/A,N/A,N/A,N/A
14/7/2020,2020,10.1038/s42003-020-1112-0,"Biodiversity, Droughts, Soil Microbiology, Trees",Missing,data availability the datasets generated during and/or analyzed during the current study are available from the corresponding author on reasonable request. this data is stored as excel files on a data portal associated with the fundiveurope and soilforeurope projects.|code availability the codes created to analyze the datasets during the current study are available from the corresponding author on reasonable request.,Method,Yes,Yes,Supplementary Information|Online,N/A,N/A,N/A,DA|Method,Yes,Yes,Online,No,N/A,N/A,N/A,N/A
21/5/2019,2019,10.3390/ijms20102508,"Cellular Senescence, Methyl-CpG-Binding Protein 2, Mitochondria, Mutation, Rett Syndrome",Missing,N/A,Method,Yes,No,N/A,N/A,N/A,N/A,Method|Fulltext,Yes,No,N/A,No,N/A,N/A,N/A,N/A
30/1/2020,2020,10.5116/ijme.5e08.b95b,"Faculty, Medical, Sex Factors, Sexism, Students, Medical",Missing,"participants and data collection the participants were selected for maximal variation from the various groups that shape the culture at a medical school. thus, students and teachers were important groups in the programme. the heads of medical residencies were also interviewed, as they serve as important gatekeepers to continuing medical training. participants were selected strategically from lists of students, teachers, and residency heads, and maximal variation in gender and age was pursued. all participants were informed of the study’s aims and that they could terminate their participation at any time. in 2016, the regional ethics board determined that the project did not need ethical approval. data were collected on three separate occasions as part of a larger project. interviews lasted from 30 to 80 minutes and were conducted in swedish; the author conducted all of them. the interviews included questions about the ‘good medical student’, an excellent (future) doctor’s characteristics, educational methods, and organisational culture. the questions about participants’ personal role models were formulated in the same way on all three occasions. the first round of interviews took place in 2009, including eight interviews with medical students and eight interviews with medical teachers from the same medical school (eight male and eight female). in 2012, the second round of interviews included 21 interviews with heads of medical residencies in various hospitals in sweden (10 male and 11 female). finally, the third round in 2017 included 20 interviews with medical students (10 male and 10 female) in their final year at the medical school. excerpts of the interviews analysed for this study concerned participants’ personal role models and did not explicitly target or ask about gender. interviews often provide an ‘idealised moral account’. 31  while not a disadvantage in a study aimed to describe a practice’s moral structure, participants may still provide accounts that align more with a ‘politically correct’ view than with their own subtle biases. the questions were therefore formulated to avoid mentioning gender as an aspect of role models. instead, they intended to capture participants’ spontaneous descriptions of their role models. hence, the three main questions guiding the present analysis were:         1. do you have a role model as a doctor?         2. can you describe this person to me?         3. what is it that this person does that you find admirable? there were no direct questions about the role model’s gender, which was determined by the participant’s use of gendered pronouns or of names identifiable as male or female.",Method,Yes,No,N/A,N/A,N/A,N/A,N/A,No,No,N/A,No,N/A,N/A,N/A,N/A
1/5/2019,2019,10.1186/s12957-019-1616-6,"Biomarkers, Tumor, Carcinoma, Hepatocellular, Computational Biology, Gene Regulatory Networks, Liver Cirrhosis, Liver Neoplasms",Missing,"availability of data and materials the data that support the findings of this study are available from geo database (gse63898), david, string, and gepia database, as is mentioned in the “material and methods” section.",Method,Yes,Yes,Online,N/A,GSE63898,Gene Expression Omnibus,Method|Fulltext,Yes,No,N/A,No,N/A,N/A,N/A,N/A
4/2/2020,2020,10.7150/ijms.39775,"Antiviral Agents, DNA, Viral, Hepatitis B Surface Antigens, Hepatitis B e Antigens, Hepatitis B, Chronic, Interferon-alpha, Polyethylene Glycols",Missing,N/A,Method,Yes,No,N/A,N/A,N/A,N/A,N/A,No,No,N/A,No,N/A,N/A,N/A,N/A
10/2/2021,2021,10.1038/s41598-020-80624-3,"Epithelial Cells, Hair Follicle, Multipotent Stem Cells, Regeneration",Missing,N/A,Method,Yes,Yes,Online,N/A,N/A,N/A,Method|Fulltext,Yes,No,N/A,No,N/A,N/A,N/A,N/A
08/06/2020,2020,10.3390/ijms21114094,"Glucocorticoids, Muscle, Skeletal, Vitamin E",Missing,N/A,Method,Yes,Yes,Online,https://www.mdpi.com/1422-0067/21/11/4094/s1,N/A,N/A,Method|Fulltext,Yes,No,N/A,No,N/A,N/A,N/A,N/A
2/10/2020,2020,10.1186/s12931-020-01519-5,"Lung, Prone Position, Pulmonary Ventilation, Supine Position, Tomography, X-Ray Computed",Missing,availability of data and materials the datasets used and/or analysed during the current study are available from the corresponding author on reasonable request.,Method,Yes,No,N/A,N/A,N/A,N/A,N/A,No,No,N/A,Yes,10.21203/rs.3.rs-29528/v1,2020/05/21,http://dx.doi.org/10.21203/rs.3.rs-29528/v1,Research Square
5/2019,2019,10.1016/j.neuropsychologia.2018.01.021,"Awareness, Causality, Healthy Aging, Prefrontal Cortex",Missing,N/A,Method,Yes,No,N/A,N/A,N/A,N/A,Method,Yes,No,N/A,No,N/A,N/A,N/A,N/A
10/5/2019,2019,10.3390/genes10050361,"Archaeal Proteins, Haloferax volcanii, Zinc Fingers",Missing,N/A,Method,Yes,Yes,Online,"http://www.spp2002.uni-kiel.de, https://www.mdpi.com/2073-4425/10/5/361/s1, http://bioinfo.ibp.ac.cn/SmProt",N/A,N/A,N/A,No,No,N/A,No,N/A,N/A,N/A,N/A
23/9/2020,2020,10.1186/s12944-020-01385-6,Sedentary Behavior,Missing,availability of data and materials the knhanes was openly available in  https://knhanes.cdc.go.kr/knhanes/index.do  by submitting written oath and data utilization plan.,Method,Yes,Yes,Online,https://knhanes.cdc.go.kr/knhanes/index.do,N/A,N/A,Method|Fulltext,Yes,No,N/A,Yes,10.21203/rs.3.rs-18598/v1,2020/03/26,http://dx.doi.org/10.21203/rs.3.rs-18598/v1,Research Square
26/10/2021,2021,10.1038/s41598-021-00520-2,"Anti-Bacterial Agents, Carduus, Escherichia coli, Metal Nanoparticles, Micrococcus luteus, Silver",Missing,N/A,Method,Yes,No,N/A,N/A,N/A,N/A,N/A,No,No,N/A,Yes,10.21203/rs.3.rs-537949/v1,2021/05/27,http://dx.doi.org/10.21203/rs.3.rs-537949/v1,Research Square
2/5/2021,2021,10.1007/s10728-021-00433-1,"Gender Identity, Privacy",Missing,N/A,N/A,No,No,N/A,N/A,N/A,N/A,N/A,No,No,N/A,No,N/A,N/A,N/A,N/A
07/01/2022,2022,10.3390/ijerph19020654,"COVID-19, Education, Distance",Missing,N/A,Method,Yes,No,N/A,N/A,N/A,N/A,N/A,No,No,N/A,Yes,10.20944/preprints202012.0660.v1,2020/12/28,http://dx.doi.org/10.20944/preprints202012.0660.v1,Preprints.org
3/4/2020,2020,10.1007/s00406-020-01118-x,"Adaptation, Psychological, Outcome Assessment, Health Care, Patient Readmission, Social Adjustment",Missing,N/A,Method,Yes,No,N/A,N/A,N/A,N/A,Method,Yes,No,N/A,No,N/A,N/A,N/A,N/A
3/2/2020,2020,10.1177/1355819620902185,"Health Services Research, Publication Bias, Stakeholder Participation",Missing,N/A,Method,Yes,No,N/A,N/A,N/A,N/A,N/A,No,No,N/A,No,N/A,N/A,N/A,N/A
16/10/2020,2020,10.1186/s12916-020-01781-w,"Hospitalization, Surge Capacity",Missing,"availability of data and materials the data that support the findings of this study are available from multiple sources as indicated in additional file  2 , but some restrictions apply to the availability of some these data, which were used under licence for the current study, and so are not publicly available.",Method,Yes,Yes,Online,N/A,N/A,N/A,N/A,No,No,N/A,No,N/A,N/A,N/A,N/A
26/5/2021,2021,10.1016/S2214-109X(21)00204-7,"Neoplasms, COVID-19, Hematologic Neoplasms, Vaccines, COVID-19, COVID-19 Vaccines, Dermatomyositis, Lung Diseases, Interstitial, Urinary Bladder Neoplasms, Urology, Hernia, Ventral, Robotic Surgical Procedures, Surgical Stomas, Urinary Diversion, Urology, Dental Pulp Cavity, Tooth Root, Prevalence, Malocclusion, Angle Class II, Neoplasms, Probiotics, Stomatitis, Head and Neck Neoplasms, Neoplastic Cells, Circulating, Mouth Neoplasms, Probiotics, Low-Level Light Therapy, Stomatitis, Carcinoma, Transitional Cell, Urinary Bladder Neoplasms, Calcium Hydroxide, Endotoxins, Dentofacial Deformities, Gingival Recession, Orthognathic Surgery, Orthognathic Surgical Procedures, Anti-Infective Agents, Sodium Hypochlorite, Dental Implants, Denture, Overlay, Dental Implants, Dental Prosthesis, Implant-Supported, Biological Assay, Drugs, Investigational, Mutation, Oral Health, Dental Caries, Down Syndrome, Malocclusion, Oral Health, Carcinoma, Squamous Cell, Head and Neck Neoplasms, Mouth Neoplasms, Acetaminophen, Pharmaceutical Preparations, COVID-19, Sleep Initiation and Maintenance Disorders, COVID-19, Pandemics, Breast Neoplasms, Disabled Persons, COVID-19, Sleep Wake Disorders, COVID-19, Health Knowledge, Attitudes, Practice, Quarantine, Sleep, Sleep Initiation and Maintenance Disorders, Anthozoa, Hydrozoa, Malvaceae, Oxidative Stress, Anxiety, COVID-19, Depression, SARS-CoV-2, Sleep, COVID-19, Circadian Rhythm, Quarantine, Sleep, Sleep Disorders, Circadian Rhythm, Health Personnel, Occupational Stress, Sleep, African Americans, COVID-19, Diabetes Mellitus, Body Fluids, Urology, Anxiety, Coronavirus Infections, Depression, Pneumonia, Viral, Sleep Initiation and Maintenance Disorders, Brain-Computer Interfaces, Sleep Apnea, Obstructive, Microplastics, Armillaria, Fungal Polysaccharides, Ultrasonic Waves, Psychotherapy, Self-Help Groups, Heart Failure, Cartilage, Articular, Femur, Image Processing, Computer-Assisted, Knee Joint, Machine Learning, Osteoarthritis, Knee, Adipose Tissue, Longevity, Macrophages, Sirolimus, Cilia, Models, Biological, Numerical Analysis, Computer-Assisted, Pulsatile Flow, Budesonide, Drug Costs, Glucocorticoids, Health Expenditures, Hospital Costs, Hospitalization, Lung, Alcohol Drinking, Epigenesis, Genetic, Marijuana Smoking, Cocaine, Coronary Angiography, ST Elevation Myocardial Infarction, Algorithms, Imaging, Three-Dimensional, Neurosurgical Procedures, Robotics, Biological Products, Glucose, MicroRNAs, Oxygen, Protective Agents, Retinal Ganglion Cells, Saponins, Arthroplasty, Replacement, Hip, Postoperative Complications, Risk Assessment, Upper Extremity, Chemokines, CC, Lipopolysaccharides, MicroRNAs, Pneumonia, Idiopathic Hypersomnia, Sleep, Sleep Latency, Sleep, REM, Acute Kidney Injury, RNA, Long Noncoding, Sepsis, Discrimination, Psychological, Excitatory Amino Acid Antagonists, Ketamine, Psychotic Disorders, Receptors, N-Methyl-D-Aspartate, Alcohol Drinking, Sleep Apnea Syndromes, Acute Coronary Syndrome, Computed Tomography Angiography, Coronary Angiography, Coronary Care Units, Coronary Vessels, Bacterial Proteins, Carbapenems, Cephalosporins, Drug Resistance, Multiple, Bacterial, Pseudomonas aeruginosa, Tazobactam, beta-Lactamases, Brain, Electroencephalography Phase Synchronization, Histocompatibility Antigens Class II, Magnetoencephalography, Complementary Therapies, Exercise Therapy, Narcolepsy, Sodium Oxybate, Wakefulness-Promoting Agents, Brain Ischemia, Mexican Americans, Polysomnography, Prevalence, Sleep Apnea Syndromes, Stroke, Carcinoma, Renal Cell, Kidney Neoplasms, Hypnotics and Sedatives, Magnetic Resonance Imaging, Pattern Recognition, Visual, Propofol, Recognition, Psychology, Speech, Anaphase-Promoting Complex-Cyclosome, Cell Cycle Proteins, Meiosis, Metaphase, Oocytes, RNA, Messenger, Stored, Amino Acid Sequence, Vaccinia, Vaccinia virus, Viral Proteins, Virion, Fractures, Bone, Fractures, Cartilage, Metatarsal Bones, Polymorphism, Single Nucleotide, Sleep Wake Disorders, Chronobiology Disorders, Circadian Rhythm, Melatonin, Phototherapy, Sleep, Drugs, Generic, Enzyme Inhibitors, Quinolines, Alphavirus, Capsid Proteins, Peptide Hydrolases, Protease Inhibitors, Carcinoma, Renal Cell, Kidney Neoplasms, Mutation, Nuclear Proteins, Transcription Factors, Tumor Suppressor Proteins, Ubiquitin Thiolesterase, Electroencephalography, Hypnotics and Sedatives, Pyridines, Sleep Stages, Circadian Rhythm, Light, Lighting, Sleep, Fertilization in Vitro, Pregnancy, Twin, Inpatients, Dendritic Spines, Models, Neurological, Counseling, Heroin Dependence",Missing,"data sharing individual-level data used in these analyses are publicly available on the dhs and mics websites. the processed database with coverage levels and summary indices of inequality are available on the  who health equity monitor database , which is populated with data analysed at the iceh at the federal university of pelotas.",Method,Yes,No,N/A,N/A,N/A,N/A,N/A,No,No,N/A,N/A,N/A,N/A,N/A,N/A
15/4/2020,2020,10.1002/jia2.25484,"HIV Integrase Inhibitors, HIV Protease Inhibitors, Heterocyclic Compounds, 3-Ring, Reverse Transcriptase Inhibitors, Weight Gain",Missing,N/A,Method,Yes,No,N/A,N/A,N/A,N/A,N/A,No,No,N/A,No,N/A,N/A,N/A,N/A
20/10/2020,2020,10.3390/ijerph17207638,"Negotiating, Water Resources",Missing,"4.1.2. data sources according to index system shown in  table 1 , relevant data were collected through the transboundary freshwater dispute database (tfdd) [ 40 ], transboundary waters assessment programme (twap) database [ 2 ] and existing studies [ 19 , 41 ]. among them, f 1  is the sum of irrigation water consumption, industrial water consumption, and domestic water consumption. the details are shown in  table 3 .",Method,Yes,No,N/A,N/A,N/A,N/A,N/A,No,No,N/A,No,N/A,N/A,N/A,N/A
1/11/2020,2020,10.1080/10872981.2020.1841982,"Blood Pressure, Blood Pressure Determination, Clinical Competence, Students, Medical",Missing,"data collection in 2019 in the second stage of the 2019 segment of the study, the cohort of 108 students were first divided into four groups (n = 32, 24, 24, and 28). the first two groups, with 32 and 24 students, were tested together on january 15. on january 16, the latter two groups, with 24 and 28 students, were tested in the same manner as the day before. the same procedures for the experiment used in 2017 were followed for both days in 2019, with the exception of the initial bp setting values, which were set differently for each manikin and each day. no participants took part in this experiment more than once in one year. study design was not revealed to participants, who simply followed instructions. as the concrete process of data collection: (1) an instructor handed each student a consent form and an anonymous recording paper with three spaces to write down three blood pressure values. (2) two students, one from each group, entered the room. there were two rows of manikin arms, with both assigned the same series of three context cases. one row was assigned to each group. the two students sat in the front of simulator arm of their case one scenario of their assigned row. (3) students read the description of the clinical context assigned that simulator arm. (4) using auscultation, students measured the bp of the manikin arms and recorded the resulting bp values on the paper anonymously. (5) students then moved to each of the next two cases and repeated the process. (6) the recording paper was returned to an instructor ( figure 2 ). figure 2. diagram of layout and procedure for cohort of second-year medical students assessing bp measurement skills in 2019 throughout our simulation-based experiments in 2017 and 2018, three manikin arms (blood pressure trainer, atsuhime, kyoto kagaku co., ltd., kyoto, japan) were used. the authors followed instrument instructions to calibrate the manikin arm both just before, and one hour after starting, the student readings to ensure accuracy. the diaphragm of a dual-headed stethoscope was used, with bp measurements recorded in mmhg.",Method,Yes,No,N/A,N/A,N/A,N/A,DA|Method,Yes,No,N/A,No,N/A,N/A,N/A,N/A
12/3/2022,2022,10.3390/ijms23063065,"Dipeptidyl-Peptidase IV Inhibitors, Sepsis, Thrombosis",Missing,data availability statement the data presented in this study are available on request from the corresponding author.,Method,Yes,Yes,Online,"10.3390/ijms23063065/s1, https://www.mdpi.com/article/10.3390/ijms23063065/s1",N/A,N/A,N/A,No,No,N/A,No,N/A,N/A,N/A,N/A
22/8/2019,2019,10.1038/s41598-019-48686-0,"Temporal Lobe, Tinnitus, Transcranial Direct Current Stimulation",Missing,N/A,Method,Yes,No,N/A,N/A,N/A,N/A,N/A,No,No,N/A,No,N/A,N/A,N/A,N/A
30/12/2020,2020,10.3390/s21010197,"Athletes, Sports",Missing,data availability statement not applicable.,N/A,No,Yes,Online,http://www.apidis.org/_Dataset/,N/A,N/A,N/A,No,No,N/A,No,N/A,N/A,N/A,N/A
02/06/2020,2020,10.4269/ajtmh.19-0663,"Artemisinins, Attitude to Health, Mass Drug Administration, Patient Acceptance of Health Care, Quinolines",Missing,N/A,Method,Yes,No,N/A,www.ajtmh.org.Qualitative,N/A,N/A,N/A,No,No,N/A,No,N/A,N/A,N/A,N/A
1/4/2020,2020,10.1186/s40168-020-00816-x,"Attention Deficit Disorder with Hyperactivity, Behavior, Animal, Gastrointestinal Microbiome, Host Microbial Interactions",Missing,"availability of data and materials the datasets used and/or analyzed during the current study are available,  http://gofile.me/389ws/xrrvbw2ac .",Method,Yes,Yes,Online,http://gofile.me/389ws/xrrvbw2ac,N/A,N/A,Method,Yes,No,N/A,No,N/A,N/A,N/A,N/A
07/06/2019,2019,10.3390/ijerph16112031,"Bacteria, Geologic Sediments, Power Plants, Water Microbiology",Missing,N/A,Method,Yes,Yes,Online,https://www.mdpi.com/1660-4601/16/11/2031/s1,N/A,N/A,N/A,No,No,N/A,No,N/A,N/A,N/A,N/A
21/11/2021,2021,10.3390/ijms222212523,"Campanulaceae, Candida albicans, Mycoses",Missing,data availability statement the data presented in this study are available on request from the corresponding author.,Method,Yes,Yes,Online,"https://www.mdpi.com/article/10.3390/ijms222212523/s1, 10.3390/ijms222212523/s1",N/A,N/A,N/A,No,No,N/A,No,N/A,N/A,N/A,N/A
17/4/2020,2020,10.3390/genes11040434,"Algorithms, Biomarkers, Computational Biology, Gene Expression Profiling, Gene Ontology, Transcriptome",Missing,N/A,Method,Yes,Yes,Supplementary Information|Online,"https://www.mdpi.com/2073-4425/11/4/434/s1, https://webfsgor.sysbio.cytogen.ru/",N/A,N/A,Method|Fulltext,Yes,No,N/A,Yes,10.20944/preprints202003.0373.v1,2020/03/25,http://dx.doi.org/10.20944/preprints202003.0373.v1,Preprints.org
18/8/2021,2021,10.3390/ijms22168899,"Behavior, Animal, Cannabidiol, Cognition, Dronabinol, Hallucinogens, Prefrontal Cortex",Missing,N/A,Method,Yes,No,N/A,N/A,N/A,N/A,N/A,No,No,N/A,No,N/A,N/A,N/A,N/A
1/4/2019,2019,10.1186/s12916-019-1300-2,"Patient Acceptance of Health Care, Patient Advocacy, Patient Participation, Peer Group, Psychosocial Support Systems",Missing,availability of data and materials the datasets used and/or analysed during the current study are not publicly available as consent for data sharing was not obtained at enrolment.,Method,Yes,Yes,Online,N/A,N/A,N/A,N/A,No,No,N/A,No,N/A,N/A,N/A,N/A
17/7/2019,2019,10.1038/s41598-019-46338-x,"Ethnicity, Sex Characteristics, Telomere Homeostasis",Missing,data availability the datasets generated during and/or analysed during the current study are available through the application to the growing up in new zealand data access committee.,Method,Yes,No,N/A,N/A,N/A,N/A,Method,Yes,No,N/A,No,N/A,N/A,N/A,N/A
26/1/2021,2021,10.1038/s41598-021-81788-2,"Phylogeny, Restriction Mapping, Sequence Analysis, DNA, Spiders",Missing,data availability raw ddradseq reads can be found in ncbi sequence read archive (bioproject id: prjna345307 and prjna595572).,Method,Yes,Yes,Online,N/A,"PRJNA345307, PRJNA595572",NCBI Bioproject,Method,Yes,No,N/A,No,N/A,N/A,N/A,N/A
8/2/2019,2019,10.1186/s12866-019-1404-z,"Host-Parasite Interactions, Leishmaniasis, Visceral, Macrophages",Missing,availability of data and materials all data generated or analysed during this study are included in the core section and in the supplementary information of the additional files. any additional information will be made available from the corresponding author on reasonable request.,Method,Yes,Yes,Online,N/A,N/A,N/A,Method|Supplementary,Yes,Yes,Online,No,N/A,N/A,N/A,N/A
17/2/2020,2020,10.3390/biom10020319,"Glomerulonephritis, Membranous, Thrombospondins",Missing,"2.2.1. data collection primary and secondary mgn were defined based on renal biopsy and clinical parameters. those with associated chronic conditions like hepatitis b, hepatitis c viral infection, diabetes nephropathy, malignancy, lupus nephritis type v and many other secondary causes of mgn were deemed to be secondary mgn. in contrast, those with no known associated clinical conditions were considered as primary mgn.  a total of 125 patients were diagnosed with mgn from january 2012 to october 2019 at hospitals serdang and kuala lumpur (presented in  figure 1 ). general information such as age, sex and contacts of subjects were obtained from the hospitals’ databases where 69 subjects agreed to participate in the study following detailed explanation, oral and written consents.  elisa technique was used to detect the presence of biomarkers (pla 2 r, thsd7a) in serum and urine of all subjects. urine and serum samples were measured by human anti-pla 2 r elisa kit (cat. no: mbs2600483) by double antibody sandwich technique while human anti-thsd7a elisa kits (cat. no: mbs109100) by quantitative sandwich technique. both human pla 2 r1 and human thsd7a biomarkers were obtained from mybiosource.com. the standard curve for each of the biomarker was plotted as shown in  appendix a . in contrast, some samples were sent for laboratory tests including serum albumin, creatinine, urea, urinary protein creatinine index (upcr index) and estimated glomerular filtration rate (egfr) was calculated using ckd-epi creatinine 2009 equation.",Method,Yes,No,N/A,N/A,N/A,N/A,DA,Yes,No,N/A,Yes,10.20944/preprints202108.0109.v1,2021/08/05,http://dx.doi.org/10.20944/preprints202108.0109.v1,Preprints.org
01/05/2021,2021,10.1002/vms3.479,"Chickens, Immunity, Innate",Missing,data availability statement i certify that all data in the article are true and reliable. all public data generated or analysed during this study are included in this article. data sharing is not applicable to this article as no new data were created or analysed in this study.,Method,Yes,Yes,Online,https://publons.com/publon/10.1002/vms3.479,N/A,N/A,Method|Fulltext,Yes,No,N/A,No,N/A,N/A,N/A,N/A
31/8/2020,2020,10.1186/s40168-020-00902-0,"Ecosystem, Microbial Viability, Salinity",Missing,"availability of data and materials the genomes of cultured bradymonabacteral isolates have been deposited in the ncbi database under genbank accession numbers cp042467.1 ( bradymonadales  strain v1718), cp042468.1 ( bradymonadales  strain yn101), vopx00000000.1 ( bradymonadales  strain tmq1), vosl00000000.1 ( bradymonadales  strain tmq2), qrgz00000000.1 ( bradymonadales  strain tmq3), vosm00000000.1 ( bradymonadales  strain tmq4), cp030032.1 ( bradymonas sediminis  fa350 t ), qhko00000000.1 ( lujinxingia litorali  b210 t ), and sadd00000000.1 ( lujinxingia sediminis  seh01 t ). the genomes of uncultured bradymonabacteria have been deposited in the ncbi database under genbank accession numbers pwkz00000000.1 ( bradymonadales  bin cssed10_215), pwtn00000000.1 ( bradymonadales  bin cssed11_191), pxaj00000000.1 ( bradymonadales  bin t3sed10_204), and pwzz00000000.1 ( bradymonadales  bin t3sed10_190). the 16s rrna gene data sets of gaodao salterns have been deposited in the sequence read archive under accession number srp217756 for all the samples. the transcriptome sequences for predation of fa350 t  have been deposited in the ncbi database under accession numbers prjna559243 and prjna559253. all bradymonabacteral isolates have been deposited at the shandong infrastructure of marine microbial resources hosted by the laboratory of marine microbiology at shandong university ( http://www.sdum.wh.sdu.edu.cn/search.html?itemid=14 ). all bradymonabacteral isolates are available upon request. the bash, r, and python scripts for this study are available on the github:  https://github.com/2015qyliang/bradymonabacteriaanalysis .",Method,Yes,Yes,Online,"http://www.sdum.wh.sdu.edu.cn/search.html?itemid=14, https://github.com/2015qyliang/bradymonabacteriaanalysis","PRJNA559243, PRJNA559253, SRP217756","Github ,  NCBI Sequence Read Archive, NCBI Bioproject",DA|Method|Fulltext,Yes,Yes,Online,Yes,10.21203/rs.2.20535/v2,2020/03/10,http://dx.doi.org/10.21203/rs.2.20535/v2,Research Square
10/10/2020,2020,10.3390/molecules25204608,"Carcinoma, Hepatocellular, Cedrus, Liver Neoplasms, Plant Extracts",Missing,N/A,Method,Yes,No,N/A,N/A,N/A,N/A,N/A,No,No,N/A,No,N/A,N/A,N/A,N/A
10/3/2021,2021,10.1007/s00520-021-06109-9,"Catheterization, Central Venous, Neoplasms, Prosthesis-Related Infections",Missing,availability of data and material data supporting the findings of this study are available from the corresponding author (j.s.) upon reasonable request.|code availability raw data were generated at the toyohashi municipal hospital. derived data supporting the findings of this study are available from the corresponding author on request.,Method,Yes,No,N/A,N/A,N/A,N/A,DA|Method|Fulltext,Yes,No,N/A,No,N/A,N/A,N/A,N/A
10/12/2021,2021,10.1038/s41467-021-27373-7,"Biological Phenomena, Biomass, Forests, Trees",Missing,"code availability statistical analyses and fia data-processing were conducted in the r programming environment, version 3.4. generalized linear model regressions were performed using the r  stats  package, version 3.4.3. marginal effect estimates were calculated using r package  ggeffects , version 1.1.1. other gis analyses were performed in the esri software arcgis pro, version 2.4. the global analysis of forest fragmentation was performed in google earth engine. the code used to analyze and process fia data are not available publicly due to data privacy laws.",Method,Yes,Yes,Online,"https://apps.fs.usda.gov/fia/datamart/, https://www.mrlc.gov/data",N/A,N/A,DA|Method,Yes,Yes,Online,No,N/A,N/A,N/A,N/A
09/08/2020,2020,10.1002/vms3.335,"Monkey Diseases, Papio anubis, Swine, Swine Diseases",Missing,N/A,Method,Yes,No,N/A,https://publons.com/publon/10.1002/vms3.335,N/A,N/A,N/A,No,No,N/A,No,N/A,N/A,N/A,N/A
4/1/2022,2022,10.1186/s12879-021-07016-4,"COVID-19, Sepsis",Missing,availability of data and materials the datasets generated and/or analyzed during the current study are not publicly available as they form a part of the patients’ medical record at dha but are available from the corresponding author on reasonable request.,Method,Yes,Yes,Online,N/A,N/A,N/A,N/A,No,No,N/A,Yes,10.21203/rs.3.rs-690608/v1,2021/09/07,http://dx.doi.org/10.21203/rs.3.rs-690608/v1,Research Square
21/1/2022,2022,10.1001/jamanetworkopen.2021.44039,"Patient Discharge, Time-to-Treatment, Vascular Surgical Procedures",Missing,N/A,Method,Yes,No,N/A,N/A,N/A,N/A,N/A,No,No,N/A,No,N/A,N/A,N/A,N/A
20/5/2021,2021,10.5888/pcd18.200596,"COVID-19, Food Supply, Nutritional Status, Pandemics, Program Evaluation, Social Media",Missing,"data collection four graduate students were trained to recruit participants and administer the survey. to ensure fidelity, we provided an interviewer script to all interviewers. every person waiting to attend the market was invited to participate in the study. a pilot test (n = 73) was conducted at martha’s table market in january 2020 to assess clarity and appropriateness of the survey instrument and strategies to engage market attendees. during the first week of january, 80 shoppers at martha’s table’s daily market were invited to participate in the pilot survey, and 73 (91.3%) completed the survey. of those, 35 (47.9%) completed the survey on their own; 38 participants (52.1%) preferred to have the interviewer read the questions aloud. we made 2 revisions after the pilot test. we added examples of non–social networking websites to the question “do you use the internet?” to avoid confusing the terms “internet” and “social media,” and we added skip-logic instructions, allowing respondents to skip questions that did not apply to them, based on answers to previous questions. we invited 424 market attendees to participate; 381 agreed and completed the survey (89.9% response rate). we excluded 6 surveys because the respondents were martha’s table employees. the final sample size was 375 surveys, of which most (60.3%, n = 226) were completed with the interviewer reading the questions out loud.",Method,Yes,No,N/A,N/A,N/A,N/A,DA,Yes,No,N/A,No,N/A,N/A,N/A,N/A
21/2/2022,2022,10.3390/v14020440,"DNA Barcoding, Taxonomic, Disease Reservoirs, Evolution, Molecular, Genomics, Recombination, Genetic, SARS Virus, SARS-CoV-2",Missing,"data availability statement the genome alignment, the four swb output files, the four supertri mrp files, the four sb trees (sb 250 , sb 500 , sb 1000 , and sb 2000 ), and all the 1176 gb barcodes constructed in this study are available in the open science framework (osf) platform at  https://osf.io/wjhyc/  accessed on 1 june 2021. the swb, bbc, and lfg programs are available at  https://github.com/opalerambaud/gbbarcodesproject  accessed on 1 june 2021.",Method,Yes,Yes,Online,"10.3390/v14020440/s1, https://osf.io/wjhyc/, https://www.mdpi.com/article/10.3390/v14020440/s1, https://github.com/opalerambaud/gbbarcodesproject",N/A,"Open Science Framework, Github",Method|Fulltext,Yes,Yes,Online,No,N/A,N/A,N/A,N/A
3/3/2022,2022,10.1186/s13018-022-03022-7,"Bone Remodeling, Durapatite, Hip Prosthesis, Prosthesis Design",Missing,availability of data and materials all data generated or analyzed during this study are included in this published article.,Method,Yes,No,N/A,N/A,N/A,N/A,N/A,No,No,N/A,Yes,10.21203/rs.3.rs-1070995/v1,2021/11/15,http://dx.doi.org/10.21203/rs.3.rs-1070995/v1,Research Square
6/2/2019,2019,10.1186/s12879-019-3755-3,Helminthiasis,Missing,availability of data and materials the datasets that were used for the analysis and the preparation of this manuscript are available from the corresponding author upon reasonable request.,Method,Yes,No,N/A,N/A,N/A,N/A,N/A,No,No,N/A,No,N/A,N/A,N/A,N/A
7/4/2021,2021,10.1038/s41598-021-86959-9,"Aging, Ankle Joint, Motor Skills, Muscle Contraction",Missing,N/A,Method,Yes,No,N/A,N/A,N/A,N/A,Method|Fulltext,Yes,No,N/A,No,N/A,N/A,N/A,N/A
23/1/2019,2019,10.1186/s12882-019-1213-5,"Kidney Transplantation, Pregnancy Outcome, Pregnancy, High-Risk",Missing,availability of data and materials the datasets used and/or analysed during the current study are available from the corresponding author on reasonable request.,Method,Yes,Yes,Online,N/A,N/A,N/A,Method,Yes,No,N/A,No,N/A,N/A,N/A,N/A
28/10/2021,2021,10.3390/ijms222111641,"Antiviral Agents, Drug Evaluation, Preclinical, SARS-CoV-2",Missing,data availability statement the data presented in this study are available in the article.,Method,Yes,No,N/A,N/A,N/A,N/A,Method,Yes,No,N/A,No,N/A,N/A,N/A,N/A
Oct-Dec/2019,2019,10.25122/jml-2019-0035,"Acceptance and Commitment Therapy, Cognition, Coronary Disease, Emotional Regulation, Self-Control",Missing,N/A,Method,Yes,No,N/A,N/A,N/A,N/A,N/A,No,No,N/A,No,N/A,N/A,N/A,N/A
16/5/2019,2019,10.26508/lsa.201800244,MicroRNAs,Missing,N/A,Method,Yes,No,N/A,N/A,N/A,N/A,Method,Yes,No,N/A,No,N/A,N/A,N/A,N/A
4/3/2021,2021,10.1038/s41598-021-84679-8,"Masks, Models, Statistical, Physical Distancing",Missing,data availability all the data and codes to reproduce our analysis are publicly available at  https://github.com/ababino/babino2020masks .,Method,Yes,Yes,Online,"https://github.com/ababino/babino2020masks, https://covidtracking.com/",N/A,Github,DA,Yes,Yes,Online,No,N/A,N/A,N/A,N/A
12/12/2019,2019,10.1038/s41598-019-55360-y,"Dancing, Interpersonal Relations, Movement, Social Behavior",Missing,data availability all data needed to evaluate the conclusions in the paper are present in the paper and/or the supplementary materials. additional data related to this paper may be requested from the authors.,Method,Yes,Yes,Online,"www.youtube.com, https://www.youtube.com/watch?v",N/A,N/A,N/A,No,No,N/A,No,N/A,N/A,N/A,N/A
21/4/2021,2021,10.1155/2021/6676681,"Acoustic Stimulation, Brain, Evoked Potentials, Auditory, Models, Neurological",Missing,data availability all used data is within the paper.,Method,Yes,No,N/A,N/A,N/A,N/A,N/A,No,No,N/A,No,N/A,N/A,N/A,N/A
10/12/2019,2019,10.31744/einstein_journal/2020AO4908,None,Missing,N/A,Method,Yes,No,N/A,N/A,N/A,N/A,N/A,No,No,N/A,No,N/A,N/A,N/A,N/A
2/3/2021,2021,10.1038/s41598-021-84491-4,"Birth Weight, Linkage Disequilibrium, Polymorphism, Single Nucleotide, Receptors, G-Protein-Coupled, Taste",Missing,"data availability the data for this work will be made available to researchers who submit a reasonable and detailed request to the corresponding author, conditional to approval of the ethics commission of the meyer children hospital of florence which is the appointed irb for all the pediatric study in the tuscany region. data will be stripped from all information allowing identification of study participants.",Method,Yes,No,N/A,N/A,N/A,N/A,N/A,No,No,N/A,No,N/A,N/A,N/A,N/A
13/2/2019,2019,10.1007/s12560-019-09369-1,"Rivers, Waste Water",Missing,N/A,Method,Yes,No,N/A,N/A,N/A,N/A,N/A,No,No,N/A,No,N/A,N/A,N/A,N/A
14/10/2021,2022,10.1007/s10103-021-03438-3,"Electromagnetic Fields, Vagina",Missing,N/A,Method,Yes,No,N/A,N/A,N/A,N/A,Method|Fulltext,Yes,No,N/A,No,N/A,N/A,N/A,N/A
23/10/2020,2020,10.1002/jcla.23637,"Granulomatous Disease, Chronic, Mutation, NADPH Oxidase 2",Missing,data availability statement the data supporting the study findings are available from the corresponding author upon reasonable request.,Method,Yes,No,N/A,N/A,N/A,N/A,N/A,No,No,N/A,No,N/A,N/A,N/A,N/A
16/9/2019,2019,10.2196/13833,"Exercise, User-Computer Interface, Video Games, Virtual Reality",United Kingdom,N/A,Method,Yes,No,N/A,N/A,N/A,N/A,Fulltext,Yes,No,N/A,Yes,10.2196/preprints.13833,2019/03/01,http://dx.doi.org/10.2196/preprints.13833,Journal of Medical Internet Research
10/4/2019,2019,10.1155/2019/9024258,"Home Childbirth, Parity, Patient Acceptance of Health Care, Pregnancy Outcome, Prenatal Care",Missing,data availability the datasets used in this study are available from the corresponding author upon reasonable request.,Method,Yes,No,N/A,N/A,N/A,N/A,N/A,No,No,N/A,No,N/A,N/A,N/A,N/A
04/08/2020,2021,10.1002/cne.24994,"Monodelphis, Spinal Cord Injuries, Spinal Cord Regeneration, Transcriptome",Missing,"data availability statement the data that support the findings of this study are openly available in genbank's (rrid:scr_004891) sequence read archive at http://www.ncbi.nlm.nih.gov/bioproject/564188, bioproject accession id: prjna564188.",Method,Yes,Yes,Online,"http://www.ncbi.nlm.nih.gov/bioproject/564188, http://web.stanford.edu/group/barres_lab/brain_rnaseq.html, 10.1002/cne.24994.AUTHOR, https://publons.com/publon/10.1002/cne.24994.AUTHOR",PRJNA564188,NCBI Bioproject,Method|Supplementary|Fulltext,Yes,No,N/A,No,N/A,N/A,N/A,N/A
5/11/2021,2021,10.1038/s41467-021-26018-z,"Ado-Trastuzumab Emtansine, Antibodies, Monoclonal, Humanized, Breast Neoplasms, Trastuzumab",Missing,"source data   source data|data availability all raw data necessary to interpret, verify, and extend the research in this article is provided in the data source files.  source data  are provided with this paper.",Method,Yes,Yes,Online,N/A,N/A,N/A,Method,Yes,Yes,Online,Yes,10.1101/2021.07.06.21255069,2021/07/08,http://dx.doi.org/10.1101/2021.07.06.21255069,medRxiv
31/10/2020,2020,10.1186/s12873-020-00383-2,"Blood Pressure, Heart Rate, Severity of Illness Index, Shock",Missing,"availability of data and materials the datasets generated and/or analysed during the current study are available in the open science framework repository,  https://osf.io/n94zs/  or doi 10.17605/osf.io/n94zs.",Method,Yes,Yes,Online,"10.17605/osf.io/n94zs, https://osf.io/n94zs/, osf.io/n94zs",N/A,Open Science Framework,Method,Yes,No,N/A,Yes,10.21203/rs.3.rs-51296/v1,2020/08/03,http://dx.doi.org/10.21203/rs.3.rs-51296/v1,Research Square
9/1/2019,2019,10.1155/2019/7698038,"Birth Weight, Fetal Weight, Pregnancy Trimester, Third, Ultrasonography, Prenatal",Missing,data availability the.xlsx data used to support the findings of this study are included within the supplementary information file(s).,Method,Yes,No,N/A,N/A,N/A,N/A,N/A,No,No,N/A,No,N/A,N/A,N/A,N/A
16/3/2020,2020,10.1093/bioinformatics/btaa169,"RNA-Seq, Single-Cell Analysis",Missing,N/A,N/A,No,Yes,Online,"https://github.com/pachterlab/SGYP_2019, 10.6084/m9.figshare.11725920.v1, https://github.com/YosefLab/scVI/blob/master/tests/notebooks/linear_decoder.ipynb.4",N/A,"Github, figshare",Fulltext,Yes,No,N/A,Yes,10.1101/737601,2019/08/18,http://dx.doi.org/10.1101/737601,bioRxiv
3/5/2019,2019,10.1186/s13054-019-2446-1,"Guideline Adherence, Respiratory Distress Syndrome, Sepsis, Treatment Outcome",Missing,availability of data and materials the datasets generated and/or analysed during the current study are available from the corresponding author or trial chief investigators on reasonable request.,Method,Yes,Yes,Online,N/A,N/A,N/A,N/A,No,No,N/A,No,N/A,N/A,N/A,N/A
23/4/2019,2019,10.3390/nu11040906,"Aging, Cordyceps, Testis",Missing,N/A,Method,Yes,Yes,Online,https://www.mdpi.com/2072-6643/11/4/906/s1,N/A,N/A,Method|Fulltext,Yes,No,N/A,No,N/A,N/A,N/A,N/A
07/10/2021,2021,10.3390/nu13103518,"Consumer Behavior, Diet, Healthy, Food Packaging, Food Preferences, Functional Food",Missing,data availability statement  the data presented in this study are available on request from the corresponding author.,Method,Yes,No,N/A,N/A,N/A,N/A,N/A,No,No,N/A,No,N/A,N/A,N/A,N/A
13/8/2019,2019,10.1186/s12913-019-4395-4,"Community Health Workers, Quality of Health Care, Reproductive Health Services",Missing,availability of data and materials the interview guide used and transcripts analysed during the current study are available from the corresponding author on reasonable request.,Method,Yes,Yes,Online,N/A,N/A,N/A,N/A,No,No,N/A,No,N/A,N/A,N/A,N/A
24/3/2020,2020,10.2196/16660,"Psychometrics, Telemedicine, Virtual Reality Exposure Therapy",Sweden,N/A,Method,Yes,No,N/A,N/A,N/A,N/A,N/A,No,No,N/A,No,N/A,N/A,N/A,N/A
07/01/2021,2021,10.3390/ijerph18020434,"Nurse Administrators, Nursing Staff, Hospital",Missing,data availability statement not applicable.,Method,Yes,No,N/A,N/A,N/A,N/A,N/A,No,No,N/A,No,N/A,N/A,N/A,N/A
27/12/2021,2021,10.1155/2021/3666622,Algorithms,Missing,data availability the data used to support the findings of this study are available from the corresponding author upon request.,N/A,No,No,N/A,N/A,N/A,N/A,Method|Fulltext,Yes,No,N/A,No,N/A,N/A,N/A,N/A
04/12/2020,2020,10.3390/ijerph17239036,"COVID-19, Exercise, Mental Health, Pandemics",Missing,N/A,Method,Yes,No,N/A,N/A,N/A,N/A,N/A,No,No,N/A,No,N/A,N/A,N/A,N/A
08/01/2019,2019,10.1042/BSR20181165,"Hypoxia, Melanoma, Membrane Glycoproteins",Missing,N/A,Method,Yes,No,N/A,N/A,N/A,N/A,N/A,No,No,N/A,No,N/A,N/A,N/A,N/A
24/6/2021,2021,10.1080/21505594.2021.1932183,"Biomphalaria, Quantitative Trait Loci, Schistosoma mansoni, Virulence",Missing,N/A,Method,Yes,Yes,N/A,N/A,N/A,N/A,Method|Fulltext,Yes,No,N/A,Yes,10.1101/2020.12.23.424224,2020/12/24,http://dx.doi.org/10.1101/2020.12.23.424224,bioRxiv
18/3/2021,2021,10.3390/ijerph18063155,"Athletic Performance, Soccer",Missing,data availability statement the data used is available in the following link: 10.5281/zenodo.4616371.,Method,Yes,Yes,Online,10.5281/zenodo.4616371,N/A,Zenodo,Method|Fulltext,Yes,No,N/A,No,N/A,N/A,N/A,N/A
04/01/2022,2022,10.3390/ijms23010534,"Fas Ligand Protein, Gene Expression, Hematopoietic Stem Cell Transplantation",Missing,N/A,Method,Yes,Yes,Online,"10.3390/ijms23010534/s1, https://www.mdpi.com/article/10.3390/ijms23010534/s1",N/A,N/A,Method,Yes,No,N/A,No,N/A,N/A,N/A,N/A
25/4/2021,2021,10.34172/jrhs.2021.48,"Contact Tracing, Family, Family Characteristics, Pandemics",Missing,N/A,Method,Yes,No,N/A,N/A,N/A,N/A,Method|Fulltext,Yes,No,N/A,No,N/A,N/A,N/A,N/A
4/3/2021,2021,10.1038/s41598-021-84711-x,"Androgens, Body Dissatisfaction, Somatotypes, Testosterone",Missing,N/A,Method,Yes,No,N/A,N/A,N/A,N/A,N/A,No,No,N/A,No,N/A,N/A,N/A,N/A
10/10/2019,2019,10.1186/s12974-019-1567-4,"Alzheimer Disease, Amyloid beta-Peptides, Biomarkers, Kynurenine, Neurofilament Proteins",Missing,availability of data and materials the datasets used and/or analysed during the current study are available from the corresponding author on reasonable request.,Method,Yes,Yes,Online,N/A,N/A,N/A,N/A,No,No,N/A,No,N/A,N/A,N/A,N/A
11/11/2020,2020,10.1186/s12888-020-02941-1,"Baths, Depression",Missing,"data collection and monitoring a data manager (cs), blind to treatment allocation, reviewed and evaluated data, in order to detect errors during data collection, and conducted a quality review of the database, with double data entry by two independent persons for 20% of the values.|availability of data and materials the datasets analysed during the current study is available from the corresponding author on reasonable request.",Method,Yes,No,N/A,N/A,N/A,N/A,Method|Fulltext,Yes,No,N/A,Yes,10.1101/409276,2018/09/12,http://dx.doi.org/10.1101/409276,bioRxiv
19/7/2019,2019,10.1002/jia2.25292,"AIDS Serodiagnosis, HIV Infections, Health Personnel",Missing,"2.3 data collection and management the two primary data sources, the index case testing register and the hiv testing and counselling register were abstracted monthly.  from the index case testing registers the following variables were abstracted for this analysis:   total number of index cases. these were known or newly diagnosed hiv‐positive persons who had at least one contact (defined as sexual partner, biological child or other household member) with an unknown hiv status. total number of untested contacts listed overall total number of untested contacts listed disaggregated by age: <1 year, 1 to 14 years, 15 to 24 years and > 25 years and type of relationship with index: sexual partner, biological child or guardians/other relative number of family referral slips issued from the hiv testing and counselling register, the following monthly totals were abstracted for this analysis:   the number of all individuals tested at the facility, the number of all individuals who tested hiv positive for the first time, the number of persons (contacts) who presented for testing with a family referral slip,   number of contacts testing newly hiv positive (overall and by age and gender), number of contacts testing hiv negative (overall and by age and gender).   these abstracted data were then entered into a database that consisted of one record per facility per month. each record consisted of aggregate monthly data for each indicator. there was no individual‐level data. in addition to the variables described above, there was a variable for facility id (1 to 36), facility type (public, private or cham), and facility level (health centre or hospital). in total, there were 10 observations for each of the 36 facilities, resulting in a dataset with 360 observations.",Method,Yes,No,N/A,N/A,N/A,N/A,N/A,No,No,N/A,No,N/A,N/A,N/A,N/A
4/11/2020,2020,10.1038/s41598-020-76084-4,"Behavior, Animal, Methoprene",Missing,data availability raw tables of number of eggs and raw peak areas will be included in online repository.,Method,Yes,Yes,Online,N/A,N/A,N/A,Method|Fulltext,Yes,No,N/A,No,N/A,N/A,N/A,N/A
16/3/2020,2020,10.3390/ijerph17061924,"HIV Infections, Homosexuality, Male, Risk-Taking, Sexual Behavior, Social Discrimination, Syndemic",Missing,N/A,Method,Yes,No,N/A,N/A,N/A,N/A,N/A,No,No,N/A,No,N/A,N/A,N/A,N/A
1/12/2020,2020,10.1186/s12871-020-01209-1,"Intensive Care Units, Length of Stay, Postoperative Complications",Missing,availability of data and materials the datasets used and analysed during the current study are available from the corresponding author on reasonable request.,Method,Yes,No,N/A,N/A,N/A,N/A,Method,Yes,No,N/A,Yes,10.21203/rs.3.rs-33453/v1,2020/06/11,http://dx.doi.org/10.21203/rs.3.rs-33453/v1,Research Square
01/04/2021,2021,10.1016/j.jad.2021.01.091,Academic Success,Missing,N/A,Method,Yes,No,N/A,http://www.bristol.ac.uk/alspac/external/documents/grant-acknowledgements.pdf,N/A,N/A,N/A,No,No,N/A,No,N/A,N/A,N/A,N/A
2/7/2020,2020,10.1186/s13002-020-00387-z,"Ethnicity, Ethnobotany, Medicine, Traditional, Plants, Medicinal",Missing,availability of data and materials we have already included all data in this manuscript.,Method,Yes,No,N/A,N/A,N/A,N/A,DA|Method|Fulltext,Yes,No,N/A,Yes,10.21203/rs.3.rs-1010920/v1,2021/10/28,http://dx.doi.org/10.21203/rs.3.rs-1010920/v1,Research Square
26/5/2020,2020,10.3390/nu12061545,"Breakfast, Choice Behavior, Consumer Behavior, Edible Grain, Food Labeling",Missing,N/A,Method,Yes,Yes,Online,https://www.mdpi.com/2072-6643/12/6/1545/s1,N/A,N/A,Fulltext,Yes,No,N/A,No,N/A,N/A,N/A,N/A
8/4/2021,2021,10.1172/jci.insight.143379,"Adipose Tissue, Growth Differentiation Factor 3, Macrophages, Obesity",Missing,N/A,Method,Yes,Yes,Online,10.1172/jci.insight.143379DS1,N/A,N/A,Method|Fulltext,Yes,No,N/A,No,N/A,N/A,N/A,N/A
27/9/2021,2021,10.1038/s41419-021-04166-w,"Colorectal Neoplasms, Receptors, CCR2, Signal Transduction, Tumor-Associated Macrophages",Missing,data availability the data that support this study are available from the corresponding author upon reasonable request.,Method,Yes,Yes,Online,N/A,N/A,N/A,Method|Fulltext,Yes,No,N/A,No,N/A,N/A,N/A,N/A
24/6/2019,2019,10.1186/s12913-019-4222-y,"""Nurses Role"", Nursing Staff, Hospital, Patient Safety, Social Identification",Missing,availability of data and materials the data from the qualitative interviews is not made publicly available in order to fully protect the informants’ anonymity. interview guides will be made available on request to the corresponding author.,Method,Yes,Yes,Online,N/A,N/A,N/A,N/A,No,Yes,Online,No,N/A,N/A,N/A,N/A
09/12/2019,2019,10.26508/lsa.201900441,Intestinal Mucosa,Missing,data availability the sequencing data from this publication have been deposited to the genome expression omnibus database under accession number  gse130380 .,Method,Yes,Yes,Online,N/A,GSE130380,Gene Expression Omnibus,Method,Yes,No,N/A,No,N/A,N/A,N/A,N/A
28/12/2021,2021,10.1186/s12905-021-01579-9,"Menarche, Stroke",Missing,availability of data and materials data used in this analysis are available from the corresponding author on reasonable request.,Method,Yes,Yes,Online,N/A,N/A,N/A,N/A,No,No,N/A,Yes,10.21203/rs.3.rs-763575/v1,2021/08/27,http://dx.doi.org/10.21203/rs.3.rs-763575/v1,Research Square
17/5/2019,2019,10.3390/ijerph16101751,"Gestational Weight Gain, Pregnancy Complications, Pregnancy Outcome",Missing,N/A,Method,Yes,No,N/A,N/A,N/A,N/A,N/A,No,No,N/A,Yes,10.20944/preprints201904.0130.v1,2019/04/11,http://dx.doi.org/10.20944/preprints201904.0130.v1,Preprints.org
16/6/2020,2020,10.1038/s41467-020-16853-x,Alternative Splicing,Missing,source data   source data|code availability farline is publicly available ( http://fasterdb.ens-lyon.fr/farline.tgz ). other custom codes used in this study are available from the corresponding author upon reasonable request.  source data  are provided with this paper.,Method,Yes,Yes,Supplementary Information|Online,"http://www.tm4.org/, http://fasterdb.ens-lyon.fr/farline.tgz",N/A,N/A,DA|Method|Fulltext,Yes,Yes,Online,Yes,10.1101/676353,2019/06/21,http://dx.doi.org/10.1101/676353,bioRxiv
12/5/2020,2020,10.1186/s13019-020-01143-w,"Anxiety, Aortic Valve, Bioprosthesis, Heart Valve Prosthesis, Quality of Life",Missing,availability of data and materials data sharing not applicable to this article as no data sets were generated or analyzed during the current study.,Method,Yes,No,N/A,N/A,N/A,N/A,Method,Yes,No,N/A,No,N/A,N/A,N/A,N/A
21/5/2019,2019,10.1186/s12882-019-1376-0,"Dialysis Solutions, Gene Expression Profiling, Peritoneal Cavity, Signal Transduction, Transcriptome",Missing,availability of data and materials the datasets supporting the conclusions of this article are deposited in the website of  https://figshare.com/  and the materials are available from the corresponding author on reasonable request.,Method,Yes,Yes,Online,"https://www.genecards.org/, https://figshare.com/",N/A,"figshare, genecards.org",N/A,No,No,N/A,No,N/A,N/A,N/A,N/A
26/12/2019,2019,10.1186/s12882-019-1650-1,"Diabetes Mellitus, Type 2, Macular Edema",Missing,availability of data and material the datasets used and/or analysed during the current study are available from the principal investigator (miss giuliana silvestri) on reasonable request.,Method,Yes,No,N/A,N/A,N/A,N/A,N/A,No,No,N/A,No,N/A,N/A,N/A,N/A
5/1/2021,2021,10.1186/s12992-020-00650-8,"COVID-19, Depression",Missing,availability of data and materials the datasets used and/or analyzed during the current study are available from the corresponding author on reasonable request.,Method,Yes,No,N/A,N/A,N/A,N/A,N/A,No,No,N/A,No,N/A,N/A,N/A,N/A
26/4/2021,2021,10.1001/jamanetworkopen.2021.7105,"COVID-19, Incidence",Missing,N/A,Method,Yes,No,N/A,N/A,N/A,N/A,N/A,No,No,N/A,No,N/A,N/A,N/A,N/A
18/9/2021,2021,10.3390/ijms221810094,"Genetic Predisposition to Disease, Hashimoto Disease, MicroRNAs, Polymorphism, Single Nucleotide",Missing,data availability statement the data presented in this study are available on request from the corresponding author.,Method,Yes,Yes,Online,"https://www.mdpi.com/article/10.3390/ijms221810094/s1, 10.3390/ijms221810094/s1",N/A,N/A,N/A,No,No,N/A,No,N/A,N/A,N/A,N/A
7/4/2021,2021,10.1186/s12909-021-02636-5,"Physician-Patient Relations, Truth Disclosure",Missing,availability of data and materials the datasets used and/or analyzed during the current study are available from the corresponding author on reasonable request.,Method,Yes,Yes,Online,N/A,N/A,N/A,DA|Method,Yes,Yes,Online,No,N/A,N/A,N/A,N/A
11/6/2019,2019,10.3390/ijms20112846,"Infrared Rays, Lasers, Schiff Bases, Serum Albumin, Human, Zinc",Missing,N/A,Method,Yes,Yes,Online,https://www.mdpi.com/1422-0067/20/11/2846/s1,N/A,N/A,N/A,No,No,N/A,No,N/A,N/A,N/A,N/A
09/08/2019,2019,10.3390/ijerph16162851,"Anxiety Disorders, Depression, Postpartum, Life Change Events, Mothers, Postpartum Period",Missing,N/A,Method,Yes,No,N/A,N/A,N/A,N/A,N/A,No,No,N/A,No,N/A,N/A,N/A,N/A
20/7/2020,2020,10.1186/s12911-020-01158-2,"Artificial Intelligence, Attitude, Names",Missing,availability of data and materials the dataset is not publicly available because the institutional review board application did not include provisions for sharing data with external parties.,Method,Yes,No,N/A,N/A,N/A,N/A,N/A,No,No,N/A,No,N/A,N/A,N/A,N/A
17/5/2019,2019,10.1002/mbo3.870,"Basidiomycota, Plant Diseases, Triticum, Ultraviolet Rays",Missing,data accessibility all relevant data are provided in full in the results section.,Method,Yes,No,N/A,N/A,N/A,N/A,N/A,No,No,N/A,No,N/A,N/A,N/A,N/A
21/4/2021,2021,10.3390/nu13051402,"Cystic Fibrosis Transmembrane Conductance Regulator, Nutritional Status",Missing,data availability statement the data presented in this study are available on request from the corresponding author.,Method,Yes,No,N/A,N/A,N/A,N/A,N/A,No,No,N/A,No,N/A,N/A,N/A,N/A
06/10/2020,2020,10.4269/ajtmh.20-1185,"COVID-19, Chagas Cardiomyopathy, RNA, Viral",Missing,N/A,N/A,No,No,N/A,N/A,N/A,N/A,N/A,No,No,N/A,No,N/A,N/A,N/A,N/A
25/10/2019,2019,10.1038/s41598-019-50889-4,"Algorithms, Blood Glucose, Glucagon, Insulin, Models, Theoretical, Signal Transduction",Missing,data availability there is no data to be shared with this manuscript.,Method,Yes,Yes,Online,N/A,N/A,N/A,Method|Fulltext,Yes,No,N/A,Yes,10.1101/509208,2019/01/02,http://dx.doi.org/10.1101/509208,bioRxiv
10/9/2021,2021,10.1186/s12888-021-03457-y,"Behavior, Addictive, Students, Medical",Missing,availability of data and materials the datasets used and/or analyzed during the current study are available from the corresponding author on reasonable request.,Method,Yes,Yes,Online,N/A,N/A,N/A,N/A,No,No,N/A,Yes,10.21203/rs.3.rs-243904/v1,2021/02/26,http://dx.doi.org/10.21203/rs.3.rs-243904/v1,Research Square
25/2/2022,2022,10.18632/aging.203914,"Colorectal Neoplasms, Fusobacterium Infections, Gastrointestinal Microbiome, Liver Neoplasms",Missing,N/A,Method,Yes,No,N/A,N/A,N/A,N/A,Method,Yes,No,N/A,No,N/A,N/A,N/A,N/A
18/3/2020,2020,10.1038/s41467-020-15258-0,"Epidermis, Esophagus, Stem Cells",Missing,data availability the authors declare that the experimental data supporting the findings of this study are available within the paper and its  supplementary information  files.|code availability code used in computational modeling is available in github:  https://github.com/gp10/piedrafita_etal_si_code/,Method,Yes,Yes,Online,https://github.com/gp10/piedrafita_etal_si_code/,N/A,Github,DA|Method,Yes,Yes,Online,Yes,10.1101/716639,2019/07/27,http://dx.doi.org/10.1101/716639,bioRxiv
19/8/2020,2020,10.3390/ijerph17176022,"Economic Development, Efficiency, Environmental Pollution, Gross Domestic Product, Inventions",Missing,"3.3. data sources this paper uses spatial panel data from 2003 to 2016 in 10 regions. the “13th five-year plan” issued by the national development and reform commission of china was proposed to promote the sustainable development of some key urban agglomerations. with reference to the chinese government’s development plan and the consensus of most scholars, this paper selects 10 urban agglomerations as study samples: beijing–tianjin–hebei, yangtze river delta, pearl river delta, shandong peninsula, west coast of the straits, central–southern liaoning, central plains, middle reaches of yangtze river, chengdu–chongqing, and the central shaanxi plain ( table 2 ), which include a total of 122 cities. in 2013, these 10 urban agglomerations had a population of 533 million and total gdp of 38.29 trillion cny, accounting for 39.2% of the total population and 67.3% of total gdp in china. these urban agglomerations are the most fundamental areas supporting china’s land development and also play a vital role in the country’s participation in global competition. geographically, they involve three regions in the east, middle, and west of china with gradient differences, and can better represent the economic development level and characteristics of the three regions. in this paper, most statistical data were derived from the authoritative statistical yearbooks, including the 2004–2017 china environmental statistics yearbook, the 2004–2017 china urban statistical yearbook, and the 2004–2017 china statistical yearbook. the data of environmental innovation was obtained according to the green technology patent search tool provided by wipo.  table 3  reports the sample statistics of environmental productivity, environmental innovation, and other variables in china’s largest urban agglomerations ( table 3 ).",Method,Yes,No,N/A,N/A,N/A,N/A,N/A,No,No,N/A,No,N/A,N/A,N/A,N/A
20/11/2020,2021,10.1111/jcmm.15814,"Early Growth Response Protein 3, Fibroblasts, Myocardium",Missing,data availability statement the data that support the findings of this study are available on request from the corresponding author. the data are not publicly available due to privacy or ethical restrictions.,N/A,No,No,N/A,N/A,N/A,N/A,Fulltext,Yes,No,N/A,No,N/A,N/A,N/A,N/A
31/3/2020,2020,10.1007/s00421-020-04354-0,"Bone Remodeling, Caloric Restriction, Dietary Supplements, Energy Metabolism, Insulin-Like Growth Factor I, Resistance Training",Missing,N/A,Method,Yes,No,N/A,N/A,N/A,N/A,Method|Fulltext,Yes,No,N/A,No,N/A,N/A,N/A,N/A
5/8/2019,2019,10.1186/s12877-019-1236-6,"Cost of Illness, Long-Term Care, Respiratory Tract Infections",Missing,availability of data and materials data sharing is not applicable to this article as no datasets were generated or analysed during the current study.,Method,Yes,Yes,Online,N/A,N/A,N/A,N/A,No,No,N/A,No,N/A,N/A,N/A,N/A
28/2/2019,2019,10.1186/s12931-019-1008-z,"Acute Coronary Syndrome, Severity of Illness Index, Sleep Apnea, Obstructive",Missing,N/A,Method,Yes,No,N/A,N/A,N/A,N/A,N/A,No,No,N/A,No,N/A,N/A,N/A,N/A
3/2021,2021,10.4314/ejhs.v31i2.14,"Critical Illness, Hypoglycemia",Missing,N/A,Method,Yes,No,N/A,N/A,N/A,N/A,N/A,No,No,N/A,No,N/A,N/A,N/A,N/A
14/07/2021,2021,10.1021/acssynbio.1c00084,"Directed Molecular Evolution, Escherichia coli, Gene Library, High-Throughput Screening Assays, Metagenomics",Missing,N/A,N/A,No,Yes,Online,https://pubs.acs.org/doi/10.1021/acssynbio.1c00084,N/A,N/A,N/A,No,No,N/A,No,N/A,N/A,N/A,N/A
24/1/2022,2022,10.1186/s40729-022-00405-7,"Dental Implants, Mouth, Edentulous",Missing,availability of data and materials not applicable.,Method,Yes,No,N/A,N/A,N/A,N/A,N/A,No,No,N/A,No,N/A,N/A,N/A,N/A
15/1/2021,2021,10.1038/s41598-020-80622-5,"""Sjogrens Syndrome""",Missing,"data source the medical data were obtained from the national health research institute (nhri). the national health insurance (nhi) program was initiated in 1995 to provide healthcare for citizens and residents of taiwan. enrolment in this program is mandatory, resulting in a coverage rate of nearly 99% 27 . the taiwan national health insurance research database (nhird), which is maintained by the department of health and the national health research institutes of taiwan, comprises comprehensive medical care information available for research purposes. the nhird contains the medical records of approximately 23 million residents of taiwan. the large sample size and longitudinal nature of the database provide advantages for nonexperimental studies, including observational and descriptive studies. the accuracy and validity of diagnoses in the nhird have been evaluated 28 . the database provides basic information on every individual insured by the nhi program, including patient characteristics, records of outpatient visits, hospital admissions, drug prescriptions, and disease status and management. the diagnostic codes used are formatted by the international classification of diseases, ninth revision, clinical modification (icd-9-cm). the present study was approved by the institutional review board of taipei medical university (approval number n201908055) and was conducted under the approved guidelines. informed consent of the study patients was not required because the dataset consisted of de-identified secondary data released for research purposes.",Method,Yes,No,N/A,N/A,N/A,N/A,DA|Method,Yes,No,N/A,No,N/A,N/A,N/A,N/A
30/10/2021,2021,10.1186/s12911-021-01660-1,"Emergency Service, Hospital, Triage",Missing,availability of data and materials the dataset used for this study is not publicly available due to possible compromising individual privacy but is available from the corresponding author on reasonable request.,Method,Yes,No,N/A,N/A,N/A,N/A,Method,Yes,No,N/A,No,N/A,N/A,N/A,N/A
2/6/2020,2020,10.1038/s41598-020-66444-5,Endothelial Cells,Missing,N/A,Method,Yes,No,N/A,N/A,N/A,N/A,Method,Yes,No,N/A,No,N/A,N/A,N/A,N/A
16/4/2021,2021,10.3390/s21082828,"Blockchain, Internet of Things, Telemedicine",Missing,N/A,N/A,No,No,N/A,N/A,N/A,N/A,Fulltext,Yes,No,N/A,No,N/A,N/A,N/A,N/A
5/2/2020,2020,10.1038/s41598-020-58690-4,"Antibiotics, Antitubercular, Rifampin, Tuberculosis, Multidrug-Resistant, Tuberculosis, Pulmonary",Missing,data availability all data generated or analyzed during this study are included in  supplemental data .,Method,Yes,Yes,Supplementary Information|Online,N/A,N/A,N/A,N/A,No,No,N/A,No,N/A,N/A,N/A,N/A
25/2/2020,2020,10.3390/ijerph17051477,"Athletic Performance, Basketball",Missing,N/A,Method,Yes,No,N/A,N/A,N/A,N/A,N/A,No,No,N/A,No,N/A,N/A,N/A,N/A
03/05/2020,2020,10.3390/molecules25092139,"Carrageenan, Dexamethasone, Polymers, Polysaccharides",Missing,N/A,Method,Yes,No,N/A,N/A,N/A,N/A,N/A,No,No,N/A,No,N/A,N/A,N/A,N/A
31/12/2020,2020,10.5888/pcd17.200366,"Health Policy, Lead Poisoning, Schools",Missing,N/A,Method,Yes,No,N/A,N/A,N/A,N/A,N/A,No,No,N/A,No,N/A,N/A,N/A,N/A
19/2/2021,2021,10.3390/v13020318,Gram-Positive Bacterial Infections,Missing,data availability statement raw results are available from authors upon request.,Method,Yes,No,N/A,N/A,N/A,N/A,N/A,No,No,N/A,No,N/A,N/A,N/A,N/A
28/2/2019,2019,10.4274/balkanmedj.galenos.2018.2017.0168,"Adolescent Behavior, Parents, Patient Satisfaction, Quality of Health Care",Missing,N/A,Method,Yes,No,N/A,N/A,N/A,N/A,N/A,No,No,N/A,No,N/A,N/A,N/A,N/A
5/11/2021,2021,10.1186/s12889-021-12084-x,"COVID-19, Social Media",Missing,"availability of data and materials the data that support the findings of this study are available from twitter. restrictions apply to the availability of these data, which were used under license for this study. data are available from the authors with the permission of twitter.",Method,Yes,No,N/A,N/A,N/A,N/A,DA|Method|Fulltext,Yes,No,N/A,No,N/A,N/A,N/A,N/A
06/02/2022,2022,10.3390/nu14030682,"Gastroenteritis, Probiotics",Missing,data availability statement data sharing not applicable.,Method,Yes,Yes,Online,"https://www.mdpi.com/article/10.3390/nu14030682/s1, 10.3390/nu14030682/s1",N/A,N/A,N/A,No,No,N/A,No,N/A,N/A,N/A,N/A
27/5/2020,2020,10.1128/mSphere.00412-20,"Catheter-Related Infections, DNA Transposable Elements, Genetic Fitness, Providencia",United States of America,"data availability. tn-seq raw reads are freely available in the sequence read archive under bioproject  prjna578390  as accession numbers  samn13059443  to  samn13059447  and sra accession numbers  srr10312361  to  srr10312365 , and the complete data set is listed in  table s1 .",Method,Yes,Yes,Online,N/A,"SAMN13059447, SAMN13059443, SRR10312365, SRR10312361, PRJNA578390","NCBI Bioproject, NCBI Biosample, NCBI Sequence Read Archive",Method,Yes,No,N/A,No,N/A,N/A,N/A,N/A
9/1/2020,2020,10.1186/s13006-019-0248-3,"Breast Feeding, Prenatal Care",Missing,availability of data and materials the datasets used and/or analyzed during the current study are available from the corresponding author on reasonable request.,Method,Yes,No,N/A,N/A,N/A,N/A,N/A,No,No,N/A,No,N/A,N/A,N/A,N/A
8/9/2020,2020,10.1080/17453674.2020.1815975,"Anesthesia, Local, Arthroplasty, Replacement, Knee, Epinephrine, Pain, Postoperative, Postoperative Complications, Ropivacaine, Surgical Wound",Missing,"measurements and data sources the outcome measure is early wound leakage, defined as wound fluid leaking past the barrier of the wound dressing during the first 72 hours after surgery and is defined dichotomously: early wound leakage yes/no. excessive wound leakage will pass through the sides of the dressing and this is noted in the electronic medical record (emr). for the search within the emr for the outcome measure early wound leakage, we used ctcue (ctcue b.v., amsterdam,  https://ctcue.com/ ). this software can data mine through emr text and search for keywords regarding wound leakage: wound leaking, wound leakage, leaking wound, dressing saturated, dressing changed. for each of the 3 postoperative days the emr of each patient was text mined for these keywords. emrs not containing 1 of the keywords were searched through manually. pain was verbally assessed thrice daily by the nursing staff using a numeric rating scale (nrs) ranging from 0 = no pain at all to 10 = most pain imaginable. the results are noted in the emr of the patient. as nrs pain was a non-normally distributed variable we dichotomized; ≤ 3 and ≥ 4 (van dijk et al.  2012 , boonstra et al.  2016 ). variables such as smoking, diabetes, use of anticoagulants, and surgeon are associated with wound infection. because early wound leakage might be a symptom of wound infection (patel et al.  2007 , kremers et al.  2019 ), these variables were assessed as possible confounders. smoking, having diabetes, and use of anticoagulants are all assessed during the preoperative screening and recorded in the emr of each patient.",Method,Yes,Yes,Online,https://ctcue.com/,N/A,N/A,DA,Yes,Yes,Online,No,N/A,N/A,N/A,N/A
21/4/2021,2021,10.1007/s00401-021-02308-0,"Alzheimer Disease, Amyloid beta-Peptides, Brain, Cognitive Dysfunction",Missing,N/A,Method,Yes,No,N/A,N/A,N/A,N/A,N/A,No,No,N/A,No,N/A,N/A,N/A,N/A
13/5/2022,2022,10.1186/s12913-022-08059-2,"COVID-19, State Medicine",Missing,availability of data and materials the datasets generated and/or analysed during the current study are not publicly available due to the requirement for anonymisation of involved organisations and persons but are available from the corresponding author on reasonable request.,Method,Yes,Yes,Online,N/A,N/A,N/A,N/A,No,No,N/A,No,N/A,N/A,N/A,N/A
16/2/2021,2021,10.1177/1049732321992042,"Feeding and Eating Disorders, Mindfulness",Missing,N/A,N/A,No,No,N/A,N/A,N/A,N/A,Fulltext,Yes,No,N/A,No,N/A,N/A,N/A,N/A
28/5/2019,2019,10.3390/nu11061210,"Diet, Healthy, Diet, Mediterranean, Motivational Interviewing, Patient Education as Topic, Pregnancy Outcome",Missing,N/A,Method,Yes,No,N/A,N/A,N/A,N/A,N/A,No,No,N/A,No,N/A,N/A,N/A,N/A
3/7/2019,2019,10.1186/s12874-019-0787-8,"Periodicals as Topic, Research Design, Research Report",Missing,availability of data and materials the datasets used and/or analyzed during the current study are available from the corresponding author on reasonable request.,Method,Yes,Yes,Online,N/A,N/A,N/A,Method,Yes,No,N/A,No,N/A,N/A,N/A,N/A
14/9/2020,2020,10.1186/s12871-020-01111-w,"Anesthesia, Inhalation, Anesthesia, Intravenous, Portal Vein",Missing,availability of data and materials the datasets used and/or analyzed during the current study are available from the corresponding author (wf yu; ywf808@sohu.com) on reasonable request.,Method,Yes,Yes,Online,N/A,N/A,N/A,N/A,No,No,N/A,Yes,10.21203/rs.2.15935/v1,2019/10/10,http://dx.doi.org/10.21203/rs.2.15935/v1,Research Square
23/2/2022,2022,10.1186/s12879-022-07139-2,COVID-19,Missing,"availability of data and materials due to their sensitive nature, restrictions apply to the availability of the data that support the findings, which were used under license for the current study, and so are not publicly available. data are however available from the authors upon reasonable request and with permission of cedars-sinai medical center.",Method,Yes,Yes,Online,N/A,N/A,N/A,DA,Yes,Yes,Online,No,N/A,N/A,N/A,N/A
6/4/2021,2021,10.1038/s41467-021-22360-4,"Biosynthetic Pathways, Biotin, Escherichia coli, Escherichia coli Proteins",Missing,"source data source data|data availability all relevant data are available from authors. besides the data in tables and figures, supporting information is accompanied with this paper. the accession number for the atomic coordinates of bioz protein reported in this paper is  pdb: 6kue .  source data  are provided with this paper.",Method,Yes,Yes,Online,"https://pfam.xfam.org/, http://weblogo.berkeley.edu/logo.cgi",N/A,N/A,DA|Method|Fulltext,Yes,Yes,Online,No,N/A,N/A,N/A,N/A
06/11/2021,2021,10.3390/cells10113052,"Carcinoma, Hepatocellular, Darunavir, HIV-1, Liver Neoplasms, Proteasome Endopeptidase Complex, Unfolded Protein Response",Missing,N/A,Method,Yes,No,N/A,N/A,N/A,N/A,Method,Yes,No,N/A,No,N/A,N/A,N/A,N/A
8/8/2019,2019,10.1186/s12911-019-0886-9,"Attitude, Health Services Research, Privacy, Volition",Missing,availability of data and materials the datasets generated and/or analyzed during the current study are not publicly available due to the irb guidelines but are available from the corresponding author on reasonable request.,Method,Yes,Yes,Online,N/A,N/A,N/A,DA,Yes,Yes,Online,Yes,10.2196/preprints.28379,2022/03/31,http://dx.doi.org/10.2196/preprints.28379,Journal of Medical Internet Research
02/07/2020,2020,10.3390/ijerph17134769,"Coronavirus Infections, Dental Care, Infection Control, Pandemics, Pneumonia, Viral, ""Practice Patterns, Dentists""",Missing,N/A,N/A,No,No,N/A,N/A,N/A,N/A,N/A,No,No,N/A,No,N/A,N/A,N/A,N/A
5/3/2020,2020,10.1038/s41598-020-60969-5,"Capsule Endoscopes, Capsule Endoscopy, Duodenum, Monitoring, Intraoperative, Neural Networks, Computer, Stomach",Missing,N/A,Method,Yes,No,N/A,N/A,N/A,N/A,Method,Yes,No,N/A,No,N/A,N/A,N/A,N/A
17/4/2019,2019,10.1155/2019/5703764,Wnt Signaling Pathway,Missing,data availability the data used to support the findings of this study are available from the corresponding author upon request.,Method,Yes,Yes,Online,http://www.targetscan.org/,N/A,N/A,Method|Fulltext,Yes,No,N/A,No,N/A,N/A,N/A,N/A
28/8/2021,2021,10.1016/j.jbc.2021.101126,Calcium Signaling,Missing,data availability all relevant data are contained within the article or the supporting information.,N/A,No,Yes,Online,https://somapp.ucdmc.ucdavis.edu/pharmacology/bers/maxchelator/webmaxc/webmaxcS.htm,N/A,N/A,N/A,No,No,N/A,No,N/A,N/A,N/A,N/A
22/7/2019,2019,10.1186/s12913-019-4342-4,"Catchment Area, Health, Crowding, Emergency Service, Hospital, Length of Stay",Missing,availability of data and materials the data collected and analysed are not publicly available because of confidentially concerns. the data protection authorities have not given permission to share data.,Method,Yes,Yes,Online,N/A,N/A,N/A,N/A,No,No,N/A,No,N/A,N/A,N/A,N/A
20/3/2019,2019,10.1186/s40249-019-0529-5,"Anthelmintics, Praziquantel",Missing,availability of data and materials please contact the corresponding author for data requests.,Method,Yes,Yes,Online,http://www.diva-gis.org,N/A,N/A,N/A,No,No,N/A,No,N/A,N/A,N/A,N/A
01/03/2022,2022,10.3390/tomography8020049,"Carcinoma, Intraductal, Noninfiltrating",Missing,data availability statement all data generated and analyzed during this study are included in this published article. raw data supporting the findings of this study are available from the corresponding author on request.,Method,Yes,Yes,Online,"10.3390/tomography8020049/s1, https://www.mdpi.com/article/10.3390/tomography8020049/s1",N/A,N/A,N/A,No,No,N/A,No,N/A,N/A,N/A,N/A
6/1/2021,2021,10.1186/s12911-020-01364-y,"Electronic Health Records, Natural Language Processing",Missing,availability of data and materials the data used in this study cannot be shared because of the patient health information included in the texts.,Method,Yes,Yes,Online,N/A,N/A,N/A,Method|Fulltext,Yes,No,N/A,Yes,10.21203/rs.3.rs-41553/v2,2020/09/18,http://dx.doi.org/10.21203/rs.3.rs-41553/v2,Research Square
5/8/2019,2019,10.1007/s00213-019-05336-7,"Adrenergic Uptake Inhibitors, Atomoxetine Hydrochloride, Decision Making, Locus Coeruleus, Norepinephrine, Reaction Time",Missing,N/A,Method,Yes,Yes,Online,N/A,N/A,N/A,Method,Yes,No,N/A,No,N/A,N/A,N/A,N/A
29/1/2019,2019,10.1186/s13014-019-1226-z,"Postoperative Care, Radiotherapy",Missing,availability of data and materials all data generated or analyzed during this study are included in this published manuscript.,Method,Yes,No,N/A,N/A,N/A,N/A,N/A,No,No,N/A,No,N/A,N/A,N/A,N/A
24/5/2020,2020,10.1155/2020/2387378,"Disability Evaluation, Dominance, Cerebral, Hand",Missing,data availability the data used to support the findings of this study are included within the article.,Method,Yes,No,N/A,N/A,N/A,N/A,Method|Fulltext,Yes,No,N/A,No,N/A,N/A,N/A,N/A
11/3/2019,2019,10.1038/s41598-019-40719-y,"Antineoplastic Agents, Hormonal, Cell-Free Nucleic Acids, Prostatic Neoplasms, Castration-Resistant, Receptors, Androgen",Missing,N/A,Method,Yes,No,N/A,N/A,N/A,N/A,Method,Yes,No,N/A,No,N/A,N/A,N/A,N/A
25/9/2019,2019,10.3390/molecules24193477,"Acetates, Oxycodone",Missing,N/A,Method,Yes,No,N/A,N/A,N/A,N/A,N/A,No,No,N/A,No,N/A,N/A,N/A,N/A
3/2019,2019,10.4317/medoral.22742,"Dental Implants, Osseointegration, Resonance Frequency Analysis",Missing,N/A,Method,Yes,No,N/A,N/A,N/A,N/A,N/A,No,No,N/A,No,N/A,N/A,N/A,N/A
12/11/2019,2019,10.1186/s12920-019-0601-9,"Contraceptive Agents, Hormonal, Endoplasmic Reticulum, Gene Expression Regulation, Neoplastic, Medroxyprogesterone Acetate, RNA, Long Noncoding, RNA, Messenger",Missing,availability of data and materials the datasets used and/or analysed during the current study are available from the corresponding author on reasonable request.,Method,Yes,No,N/A,N/A,N/A,N/A,Method|Fulltext,Yes,No,N/A,No,N/A,N/A,N/A,N/A
9/2019,2019,10.1016/S1474-4422(19)30192-9,None,Missing,"data sharing requests for patient-level data and statistical code should be made to the corresponding author and will be considered by members of the original trial management group, including the chief investigator and members of ctru, who will release data on a case by case basis. data will be shared following the principles for sharing patient-level data as described by tudur smith et al ( bmc medicine  2015;  13:  298). the data will not contain any direct identifiers, we will minimise indirect identifiers, and remove free text data to minimise the risk of identification. for the  intervention manual  see  https://www.sheffield.ac.uk/polopoly_fs/1.525339!/file/therapymanual_nov15.pdf",Method,Yes,Yes,Online,https://www.sheffield.ac.uk/polopoly_fs/1.525339!/file/therapymanual_nov15.pdf,N/A,N/A,DA,Yes,Yes,Online,No,N/A,N/A,N/A,N/A
25/6/2019,2019,10.3390/molecules24122344,"Anticarcinogenic Agents, Mentha, Oils, Volatile, Protein Kinase Inhibitors, Vemurafenib",Missing,N/A,Method,Yes,Yes,Online,https://www.mdpi.com/1420-3049/24/12/2344/s1,N/A,N/A,N/A,No,No,N/A,No,N/A,N/A,N/A,N/A
06/10/2020,2020,10.3390/nu12103055,"Adiponectin, Biomarkers, Child Nutritional Physiological Phenomena, Dairy Products, Eating, Inflammation, Inflammation Mediators, Leptin, Oxidative Stress",Missing,N/A,Method,Yes,No,N/A,N/A,N/A,N/A,N/A,No,No,N/A,No,N/A,N/A,N/A,N/A
21/3/2022,2022,10.26508/lsa.202101269,"Single-Domain Antibodies, trans-Golgi Network",Missing,N/A,Method,Yes,No,N/A,N/A,N/A,N/A,N/A,No,No,N/A,Yes,10.1101/2019.12.21.885939,2019/12/23,http://dx.doi.org/10.1101/2019.12.21.885939,bioRxiv
12/11/2019,2019,10.1038/s41598-019-53056-x,"Bone Marrow Neoplasms, Janus Kinase 1, Janus Kinase 2, Myeloproliferative Disorders, Pyrazoles",Missing,N/A,Method,Yes,No,N/A,N/A,N/A,N/A,Method|Fulltext,Yes,No,N/A,No,N/A,N/A,N/A,N/A
23/10/2020,2021,10.1007/s00221-020-05943-3,"Evoked Potentials, Motor, Motor Cortex",Missing,data availability the data reported in this study are available via:  https://zenodo.org . the digital object identifier (doi) is: 10.5281/zenodo.4010860.,Method,Yes,Yes,Online,"https://zenodo.org, 10.5281/zenodo.4010860",N/A,Zenodo,Method|Supplementary,Yes,No,N/A,No,N/A,N/A,N/A,N/A
20/10/2020,2021,10.1007/s00392-020-01747-1,"Magnetic Resonance Imaging, Cine, Myocardial Contraction, Myocardial Infarction, Myocardium, Stroke Volume, Ventricular Function, Left",Missing,"data availability the data that support the findings of this study are available from the corresponding author on reasonable request.|code availability 2d cpa mr, cardiac performance analysis, version 1.1.2, tomtec imaging systems, unterschleissheim, germany.",Method,Yes,No,N/A,N/A,N/A,N/A,DA,Yes,No,N/A,No,N/A,N/A,N/A,N/A
28/3/2022,2022,10.3390/ijms23073713,"Athletes, Physical Endurance",Missing,"data availability statement the data that support the findings of this study are openly available in the proteomexchange consortium with the dataset identifier pxd006840, and in inra dataverse at  https://data.inrae.fr/dataset.xhtml?persistentid=doi:10.15454/2dvozs  (accessed on 10 february 2022).",Method,Yes,Yes,Online,"10.3390/ijms23073713/s1, https://www.mdpi.com/article/10.3390/ijms23073713/s1, https://data.inrae.fr/dataset.xhtml?persistentid=doi:10.15454/2dvozs, 10.15454/2dvozs",PXD006840,PRIDE Archive,Method|Fulltext,Yes,No,N/A,No,N/A,N/A,N/A,N/A
14/6/2019,2019,10.3390/v11060554,"Hepatitis E, Jaundice",Missing,N/A,Method,Yes,No,N/A,N/A,N/A,N/A,N/A,No,No,N/A,No,N/A,N/A,N/A,N/A
2019,2019,10.31557/APJCP.2019.20.11.3299,"Body Mass Index, Breast Neoplasms, Factor Analysis, Statistical, Obesity, Overweight, Postmenopause, Premenopause",Missing,N/A,Method,Yes,No,N/A,N/A,N/A,N/A,N/A,No,No,N/A,No,N/A,N/A,N/A,N/A
14/7/2021,2021,10.1186/s12711-021-00652-z,"Cattle, Fertility, Horns, Lactation, Quantitative Trait Loci",Missing,availability of data and materials the datasets used and analyzed during the current study are available from the corresponding author on reasonable request.,Method,Yes,Yes,Online,N/A,N/A,N/A,Method|Supplementary,Yes,No,N/A,No,N/A,N/A,N/A,N/A
16/1/2019,2019,10.3390/ijms20020362,"Arabidopsis, Arabidopsis Proteins, Genetic Pleiotropy, Metabolomics, Mutation, Proteomics, Seeds, Vesicular Transport Proteins",Missing,N/A,Method,Yes,Yes,Online,"http://www.mdpi.com/1422-0067/20/2/362/s1, https://www.uniprot.org/uniprot/O82772-1",N/A,"UniProt, mdpi.com",N/A,No,No,N/A,No,N/A,N/A,N/A,N/A
14/11/2019,2019,10.1038/s41598-019-53198-y,"Dependovirus, Gene Editing",Missing,data availability the datasets generated during and/or analyzed during the current study are available from the corresponding author on reasonable request. raw sequence data of dna fragments/constructs are deposited in genbank with the following accession codes: bankit2270460 sacas9 mn548085; bankit2270466 pcdna4-bdd-f8 mn548086; bankit2270469 px602-bdd-f8 mn548087.,Method,Yes,Yes,Online,http://crispr.bme.gatech.edu,N/A,N/A,DA,Yes,Yes,Online,Yes,10.1101/284786,2018/03/19,http://dx.doi.org/10.1101/284786,bioRxiv
19/2/2019,2019,10.1099/mgen.0.000254,"Gene Expression Regulation, Bacterial, Peas, Phaseolus, Rhizobium leguminosarum, Root Nodules, Plant",Missing,N/A,Method,Yes,Yes,Online,"https://img.jgi.doe.gov/cgi-bin/w/main.cgi?section=TaxonDetail&taxon_oid=2516653085, www.ebi.ac.uk/, www.dropbox.com/sh/yusb7ptvzd4odun/AAA7hj5rLoGbqf30ZY0Gv7Q2a?dl=0.4, https://img.jgi.doe.gov/cgi-bin/w/main.cgi?section=TaxonDetail&taxon_oid=2515075009, https://img.jgi.doe.gov/",N/A,N/A,Method,Yes,No,N/A,No,N/A,N/A,N/A,N/A
13/1/2020,2020,10.1186/s12954-019-0339-x,"Amphetamine-Related Disorders, Life Change Events",Missing,availability of data and materials the dataset generated and analysed during the current study is in the ownership of the attune research group and is available from the corresponding author on reasonable request.,Method,Yes,No,N/A,N/A,N/A,N/A,N/A,No,No,N/A,No,N/A,N/A,N/A,N/A
22/8/2019,2019,10.1186/s12909-019-1753-1,"Achievement, Education, Medical, Undergraduate, Emotions, Simulation Training, Students, Medical, Teaching Rounds",Missing,availability of data and materials the datasets used and/or analyzed during the current study are available from the corresponding author on reasonable request.,Method,Yes,Yes,Online,N/A,N/A,N/A,N/A,No,No,N/A,Yes,10.21203/rs.2.10637/v1,2019/06/25,http://dx.doi.org/10.21203/rs.2.10637/v1,Research Square
30/12/2019,2019,10.1186/s12909-019-1910-6,"Internship and Residency, Ophthalmology, Personnel Selection, School Admission Criteria, Sexism",Missing,availability of data and materials the datasets used and/or analyzed during the current study are available from the corresponding author on reasonable request.,Method,Yes,No,N/A,N/A,N/A,N/A,N/A,No,No,N/A,No,N/A,N/A,N/A,N/A
23/12/2020,2020,10.9745/GHSP-D-20-00078,"Anemia, Micronutrients",Missing,"data in 2017, we conducted 24 interviews and 12 focus groups with caregivers of children aged 6 months to 3 years. caregivers were defined as adults who self-reported spending at least 5 days a week providing care for the child, whether they were the child’s biological parent or otherwise. this inclusion criterion was established as the only one for recruiting caregivers as we believe the primary caregiver is typically in charge of child feeding and thus the administration, or lack thereof, of mnp and so that we could obtain a range of caregiver experiences related to gender, caregiver age, child age, child history of anemia, caregiver-child relationship, and other factors. caregivers were selected for interviews via convenience sampling in and around local health establishments and selected for focus groups through door-to-door recruitment in the neighborhoods surrounding the health establishment. the interview and focus group guides ( supplement 1 ) were developed to probe for caregiver experiences in obtaining mnp from health care providers and applying mnp to children’s meals, as well as other beliefs about anemia treatment and prevention. interviews and focus groups were conducted by authors jdb, kr, and mps in spanish, audio recorded, and transcribed in spanish. in total, we conducted individual interviews with 24 caregivers and 12 focus groups with 4 to 13 caregivers each, resulting in a total of 129 caregiver participants. the study team analyzed a subset of data from this parent study for the present analysis. more details about the data from the parent study are available from brewer et al. 15",Method,Yes,No,N/A,N/A,N/A,N/A,N/A,No,No,N/A,No,N/A,N/A,N/A,N/A
1/11/2019,2019,10.1186/s12905-019-0831-1,None,Missing,availability of data and materials the data that were used in the analyses for the manuscript are not publicly available. they could however be availed upon reasonable request by writing an email to the corresponding author.,Method,Yes,No,N/A,N/A,N/A,N/A,N/A,No,No,N/A,No,N/A,N/A,N/A,N/A
26/3/2020,2020,10.1002/ddr.21649,"Diterpenes, Kaurane, Inflammation, Liver Cirrhosis, NLR Family, Pyrin Domain-Containing 3 Protein",Missing,N/A,Method,Yes,No,N/A,N/A,N/A,N/A,Fulltext,Yes,No,N/A,No,N/A,N/A,N/A,N/A
8/6/2021,2021,10.1038/s41598-021-90968-z,"Avoidance Learning, Decision Making, Freezing, Hippocampus",Missing,data availability the data sets that support the findings of the current study and the code used to generate them are available in the donders institute repository: 10.34973/er3c-0e60.,Method,Yes,Yes,Online,10.34973/er3c-0e60,N/A,N/A,DA|Method,Yes,Yes,Online,Yes,10.1101/2021.01.29.428809,2021/02/01,http://dx.doi.org/10.1101/2021.01.29.428809,bioRxiv
6/2/2019,2019,10.1136/bmjqs-2018-008390,"Clinical Decision-Making, Decision Support Systems, Clinical, Emergency Service, Hospital, Physicians, Safety Management, State Medicine",United Kingdom,N/A,Method,Yes,No,N/A,N/A,N/A,N/A,N/A,No,No,N/A,No,N/A,N/A,N/A,N/A
16/4/2020,2020,10.3390/biom10040617,"Calcium, Cytosol, Electric Impedance, Scorpion Venoms",Missing,N/A,Method,Yes,Yes,Online,https://www.mdpi.com/2218-273x/10/4/617/s1,N/A,mdpi.com,Method|Fulltext,Yes,No,N/A,No,N/A,N/A,N/A,N/A
10/1/2020,2020,10.1155/2020/6925107,"Algorithms, Brain, Data Mining, Electroencephalography, Signal Processing, Computer-Assisted",Missing,data availability the data used to support the findings of this study are available from the corresponding author upon request.,Method,Yes,No,N/A,N/A,N/A,N/A,N/A,No,No,N/A,No,N/A,N/A,N/A,N/A
7/2/2019,2019,10.1186/s12913-019-3934-3,"Attitude of Health Personnel, Fetal Monitoring, Health Personnel, Hospitals, Teaching, Maternal Health Services, Obstetric Labor Complications, Referral and Consultation",Missing,availability of data and materials the datasets generated and or analyzed during the current study are not publicly available due to other ongoing analyses but are available from the corresponding author on reasonable request.,Method,Yes,No,N/A,N/A,N/A,N/A,N/A,No,No,N/A,No,N/A,N/A,N/A,N/A
10/9/2021,2021,10.1038/s41598-021-97319-y,"Cattle Diseases, Endometritis, Gene Expression Regulation, Gene Regulatory Networks, MicroRNAs, RNA, Long Noncoding, RNA, Messenger, Transcriptome",Missing,N/A,Method,Yes,No,N/A,https://cytoscape.org/,N/A,N/A,Method|Fulltext,Yes,No,N/A,No,N/A,N/A,N/A,N/A
21/7/2020,2020,10.3390/ijms21145172,"Axons, Cell Proliferation, Nerve Tissue, Parity",Missing,N/A,Method,Yes,No,N/A,N/A,N/A,N/A,N/A,No,No,N/A,No,N/A,N/A,N/A,N/A
31/12/2019,2020,10.3390/ijerph17010290,"Cognition, Internet, Psychological Tests, Video Games",Missing,"2.1. study design and data collection the survey was conducted from october to december of 2018 in guangzhou and chengdu, china. the cities are located in southern and south-western china and have 14.9 and 16.3 million permanent residents, respectively. four conveniently selected junior middle schools from the former (grade 7–8 classes) and three from the latter (grade 7–9 classes) cities consented to join this study; all the students of the relevant grades were invited to participate in the study. the fieldworkers briefed the students about the purpose and logistic of the study. they highlighted the anonymous nature of the study, that the return of the completed questionnaire implied informed consent to participate in the study, that students could quit anytime without being questioned, and that there were no negative consequences for refusals. such information was also printed on the cover page of the questionnaire that the students were requested to read. the students self-administered the anonymous structured questionnaire in the absence of teachers and in classroom settings. the field workers answered inquiries and cross-checked the completed questionnaires. of the 773 completed questionnaires, 18 (2.3%) were excluded from data analysis because there were more than 20% missing data in one or more scales. the remaining 755 (97.7%) questionnaires were completed by 261 students in guangzhou (34.6%) and 494 in chengdu (65.4%), respectively. to gauge test–retest reliability, 48 grade 8 chengdu students completed the same questionnaire twice within a 2-week period. no incentive was given to students. the study was approved by the survey and behavioral research ethics committee of the chinese university of hong kong.",Method,Yes,No,N/A,N/A,N/A,N/A,N/A,No,No,N/A,Yes,10.2196/preprints.26810,2021/10/27,http://dx.doi.org/10.2196/preprints.26810,Journal of Medical Internet Research
1/1/2022,2022,10.7150/thno.64033,"Brain Injuries, Hypoxia-Ischemia, Brain, Microglia, Monocytes",Missing,N/A,Method,Yes,Yes,Online,brains.LPS/HI,N/A,N/A,N/A,No,No,N/A,No,N/A,N/A,N/A,N/A
27/2/2019,2019,10.3390/ijerph16050703,"Conservation of Water Resources, Internationality, Rivers, Water",Missing,N/A,Method,Yes,Yes,Online,https://www.mdpi.com/1660-4601/16/5/703/s1,N/A,mdpi.com,N/A,No,No,N/A,No,N/A,N/A,N/A,N/A
25/4/2019,2019,10.1186/s12909-019-1543-9,"Attitude of Health Personnel, Mental Disorders, Prejudice, Psychiatry, Social Stigma, Students, Medical",Missing,availability of data and materials data is available from authors upon request.,Method,Yes,No,N/A,N/A,N/A,N/A,DA,Yes,No,N/A,No,N/A,N/A,N/A,N/A
13/10/2020,2020,10.1128/mBio.02371-20,"Adaptation, Physiological, Ammonia, Aquatic Organisms, Archaea, Genome, Archaeal, Soil Microbiology",Austria,"data availability. the genomes analyzed in this study are publicly available in ncbi or img/jgi databases, and all accession numbers are given in  table s1a . all data generated in this study are provided in  tables s1 to s4 , and generated phylogenetic trees are in  data set s1 .",Method,Yes,Yes,N/A,N/A,N/A,N/A,Method,Yes,No,N/A,Yes,10.1101/2020.06.28.176255,2020/06/29,http://dx.doi.org/10.1101/2020.06.28.176255,bioRxiv
27/11/2019,2019,10.1186/s12985-019-1252-3,"Electrosurgery, Human papillomavirus 16",Missing,availability of data and materials the datasets used and/or analyzed during the current study are available from the corresponding author on request.,Method,Yes,No,N/A,N/A,N/A,N/A,N/A,No,No,N/A,No,N/A,N/A,N/A,N/A
22/8/2019,2019,10.3390/ijms20174111,"Adaptation, Biological, Cell Membrane, Droughts, Hordeum, Plant Roots, Potassium, Stress, Physiological",Missing,N/A,Method,Yes,Yes,Online,https://www.mdpi.com/1422-0067/20/17/4111/s1,N/A,mdpi.com,N/A,No,No,N/A,No,N/A,N/A,N/A,N/A
06/11/2019,2019,10.1002/cam4.2673,"Adenocarcinoma, Bone Neoplasms, Brain Neoplasms, Colonic Neoplasms, Liver Neoplasms, Lung Neoplasms",Missing,"2.1 data source we retrieved data from the latest version of the seer 18 registries database, released in november 2018, with the seer*stat software (version 8.3.5). 19  seer is generally considered the gold standard for data quality in cancer registry, with near‐complete case ascertainment and microscopic confirmation. 18  the seer 18 database encompasses cancers diagnosed since 2000 and provides follow‐up information regarding survival status and death causes to the end of year 2016 in the most recent version. since data from seer are publicly available and de‐identified, this study was exempt from local institutional review board review.|data availability statement the data that support the findings of this study are available from the corresponding author upon reasonable request.",Method,Yes,No,N/A,N/A,N/A,N/A,DA|Method,Yes,No,N/A,No,N/A,N/A,N/A,N/A
18/2/2021,2021,10.1038/s41598-021-83733-9,"Botulinum Toxins, Drug Storage",Missing,N/A,Method,Yes,No,N/A,N/A,N/A,N/A,N/A,No,No,N/A,No,N/A,N/A,N/A,N/A
6/8/2020,2020,10.1038/s41598-020-70247-z,"Chlamydomonas reinhardtii, Light, Oxidative Stress",Missing,data availability all relevant data are included in the manuscript and the supporting information files.,Method,Yes,Yes,Online,"https://www.phytozome.net/, https://www.cbs.dtu.dk/services/TargetP/, https://www.cbs.dtu.dk/services/ChloroP/",N/A,N/A,N/A,No,No,N/A,Yes,10.1101/2021.03.30.437739,2021/03/31,http://dx.doi.org/10.1101/2021.03.30.437739,bioRxiv
22/1/2020,2020,10.3390/s20030622,"Accidental Falls, Monitoring, Ambulatory, Smartphone",Missing,N/A,N/A,No,No,N/A,N/A,N/A,N/A,Fulltext,Yes,No,N/A,No,N/A,N/A,N/A,N/A
26/8/2019,2019,10.1038/s41598-019-48706-z,"Archaeology, Hominidae, Spectrometry, Mass, Matrix-Assisted Laser Desorption-Ionization",Missing,N/A,Method,Yes,No,N/A,N/A,N/A,N/A,Method,Yes,No,N/A,No,N/A,N/A,N/A,N/A
11/3/2021,2021,10.1001/jamanetworkopen.2021.1143,"Drugs, Generic, Economic Competition, Marketing",Missing,N/A,Method,Yes,No,N/A,N/A,N/A,N/A,N/A,No,No,N/A,N/A,N/A,N/A,N/A,N/A
14/5/2022,2022,10.1186/s12872-022-02657-y,"Atrial Fibrillation, Catheter Ablation, Radiofrequency Ablation",Missing,availability of data and materials the datasets used and/or analyzed during the current study are available from the corresponding author on reasonable request.,Method,Yes,No,N/A,N/A,N/A,N/A,Method|Fulltext,Yes,No,N/A,Yes,10.21203/rs.3.rs-1165778/v1,2021/12/22,http://dx.doi.org/10.21203/rs.3.rs-1165778/v1,Research Square
01/06/2020,2020,10.3390/ijerph17113915,"Emergency Service, Hospital, Nursing Homes, Patient Transfer",Missing,"2.2. data collection and assessed variables data for each hospital transfer were recorded via a paper-based, four-page questionnaire. we assessed characteristics of the resident and the respective transfer, and, if the transfer was unplanned, further information about decision-making and influencing factors. the questionnaire was developed by a multidisciplinary team of health scientists and general practitioners (gps). furthermore, insights from interviews of nursing managers/care unit managers, findings of the existing literature [ 6 , 7 , 8 , 9 , 19 , 20 , 21 , 22 , 23 ] and results from one gps’ quality circles were taken into account. after a pilot run of one month in three nhs, the nursing staff comments were incorporated into the final version. for each hospital transfer, the following sociodemographic and health-related data of the respective resident were assessed: year of birth, sex (male/female), marital status (4 groups), dementia diagnosis (yes/no), dementia stage (3 groups), enrollment in specialized outpatient palliative care (sapv, yes/no) and need of care (5 groups). according to german long-term care insurance, all residents are classified into one of five care grades reflecting the person’s independence and competences considering physical, cognitive or psychological impairments [ 24 ]. the resident’s performance in activities of daily living should be assessed using the modified barthel index (bi) developed by shah et al. [ 23 ]. the bi sums ten domains (e.g., feeding, toilet use) leading to a total score between 0 (completely dependent) and 100 points (completely independent). for the identification of nh residents nearing the end of life, we used the surprise question (“would you be surprised if this resident died within the next 6 months?”) [ 25 ]. additionally, the nh staff stated if the resident held an ad and assessed the contained information via an adaption of the emergency advance directive called the patient directive for life sustaining measures (palma) [ 26 ]. the possible responses were: full clinical emergency treatment (including cardiopulmonary resuscitation), limited clinical treatment (without cardiopulmonary resuscitation and intensive care) and preclinical emergency treatment in the nh. the following information on the respective hospital transfer were assessed: date and time slot of transfer, whether the resident died during transfer or hospitalization, outcome of the transfer (ed/hospital admission), discharge date and reason for transfer (6 groups for planned transfers and 6 groups for unplanned transfers). for unplanned transfers, furthermore, we wanted to know the staff’s perceptions on (a) the transfer’s benefit for the resident, (b) its avoidability and (c) influencing factors of this transfer. derived from the literature [ 6 , 7 , 8 , 9 , 19 , 20 , 21 , 22 ] and expert meetings, the staff assessed the relevance of nine factors for each case (see  figure 1 ) on a 5-point likert scale ranging from ‘0 = no relevance’ to ‘4 = high relevance’. additionally, each factor could be rated as ‘not assessable’.",Method,Yes,Yes,Online,https://www.mdpi.com/1660-4601/17/11/3915/s1,N/A,mdpi.com,Method,Yes,No,N/A,Yes,10.21203/rs.2.13217/v3,2020/02/05,http://dx.doi.org/10.21203/rs.2.13217/v3,Research Square
02/06/2019,2019,10.1080/13880209.2019.1617749,"Bombyx, Killer Cells, Natural, Silk",Missing,N/A,Method,Yes,No,N/A,N/A,N/A,N/A,N/A,No,No,N/A,No,N/A,N/A,N/A,N/A
31/7/2021,2021,10.1007/s10886-021-01290-x,"Biological Assay, Feeding Behavior",Missing,"data availability (data transparency) the maize lines used in this paper are available upon request from inrae le moulon. the experimental data images and measures are available upon request from the corresponding author.|code availability (software application or custom code) the r scripts described in this manuscript as well as the 3d schematics are available on dataverse described in the text, and the java plugins from icy website.",Method,Yes,Yes,Online,N/A,N/A,N/A,DA|Method,Yes,Yes,Online,Yes,10.1101/2020.08.02.232256,2020/08/04,http://dx.doi.org/10.1101/2020.08.02.232256,bioRxiv
30/9/2020,2020,10.1016/S2352-3018(20)30229-0,"Neoplasms, Blastocystis, Blastocystis Infections, Antineoplastic Agents, Immunological, COVID-19, COVID-19, Circadian Rhythm, Adenoids, Sleep Apnea, Obstructive, Tonsillectomy, Occupational Exposure, Radiation Exposure, COVID-19, Sleep Initiation and Maintenance Disorders, Dental Implants, Diabetes Mellitus, Peri-Implantitis, Prediabetic State, Serotonin Uptake Inhibitors, Stroke, COVID-19, Bacillus cereus, Cattle Diseases, Fasciola, Fasciola hepatica, Fascioliasis, Calcium Hydroxide, Endotoxins, COVID-19, Disabled Persons, Occupational Health, COVID-19, Sleep Initiation and Maintenance Disorders, Sleep Wake Disorders, Attention Deficit Disorder with Hyperactivity, Depressive Disorder, Major, Glaucoma, COVID-19, Dreams, Pandemics, Quarantine, Ascomycota, Fusarium, Scedosporium, COVID-19, Sleep Wake Disorders, Hypertension, Myocardial Ischemia, Noise, Occupational, Occupational Diseases, Occupational Exposure, Stroke, Environmental Pollution, Estuaries, Musculoskeletal Diseases, Occupational Diseases, Occupational Exposure, Osteoarthritis, Hip, COVID-19, Sleep Initiation and Maintenance Disorders, COVID-19, Health Personnel, Sleep Wake Disorders, Algorithms, Asbestos, Mesothelioma, Mesothelioma, Malignant, Occupational Exposure, Anthozoa, Hydrozoa, Radiation Oncology, COVID-19, Coronavirus Infections, Gastroesophageal Reflux, Tooth Attrition, Tooth Wear, Alcoholism, Occupational Diseases, Occupational Exposure, Anxiety, COVID-19, SARS-CoV-2, Sleep, Sleep Apnea, Obstructive, Dreams, Sleep Wake Disorders, Choroiditis, Tuberculosis, Ocular, Uveitis, Dermoid Cyst, Orbital Neoplasms, Mental Health, Sleep Hygiene, Adenocarcinoma, Pancreatic Neoplasms, Body Fluids, Urology, Occupational Diseases, Occupational Exposure, Stroke, Work, Psycholinguistics, Reading, Semantics, Smoking, Adenocarcinoma, Thyroid Neoplasms, Epithelial Cells, Social Justice, Mycobacterium tuberculosis, Tuberculosis, Multidrug-Resistant, Laparoscopy, Adrenergic beta-Antagonists, Surgical Procedures, Operative, Negative-Pressure Wound Therapy, Specialties, Surgical, Furans, Intestines, Liver, Metabolomics, Receptors, Cytoplasmic and Nuclear, Signal Transduction, Coronary Artery Disease, Ventricular Function, Left, Kidney Transplantation, Liver Transplantation, Accidents, Traffic, Automobile Driving, Bicycling, Pedestrians, Wounds and Injuries, Lewy Body Disease, Sleep Apnea, Central, Low Back Pain, Endometrial Neoplasms, Sentinel Lymph Node, Microplastics, Algorithms, Antipsychotic Agents, Practice Guidelines as Topic, Schizophrenia, Secondary Prevention, Neoplasm Staging, Nephrectomy, Biodiversity, Game Theory, Phylogeny, Gestures, Pattern Recognition, Visual, Social Perception, Speech, Theory of Mind, Arthroplasty, Replacement, Knee, Knee Prosthesis, Conservation of Natural Resources, Ecosystem, Models, Biological, Natural Resources, Population Dynamics, Arthroplasty, Replacement, Hip, Postoperative Complications, Longitudinal Studies, Occupational Health, Risk Assessment, Upper Extremity, Arthroplasty, Replacement, Hip, Diabetes Mellitus, Glycated Hemoglobin A, Biofilms, Oxygen, Collagen, Compressive Strength, Polyesters, Tissue Scaffolds, Child Development, Cognition, Imagination, Memory, Episodic, In Situ Hybridization, Fluorescence, Virus Latency, Accelerometry, Actigraphy, Sleep, Ultraviolet Rays, Welding, Carcinoma, Renal Cell, Kidney Neoplasms, Renal Insufficiency, Chronic, Competitive Behavior, Hockey, Social Identification, Bacillus subtilis, Protein Biosynthesis, RNA, Ribosomal, Movement, Psychomotor Performance, Upper Extremity, Visual Perception, Evolution, Molecular, Genetic Variation, Influenzavirus C, Reassortant Viruses, Feces, Water Microbiology, Water Pollutants, Water Pollution, Delivery, Obstetric, Labor, Obstetric, Midwifery, ""Nurses Role"", Obstetric Nursing, Practice Guidelines as Topic, Midwifery, Nurse Midwives, Obesity, Obstetric Nursing, Pregnancy Complications, Curriculum, Education, Nursing, Baccalaureate, Infant Health, Maternal Health, Preceptorship, Computer Graphics, Genetic Code, Models, Genetic, Nucleotides, Attention, Individuality, Psychological Theory, Visual Perception, Ethanol, Mitochondria, Oryza, Plant Extracts, Positron-Emission Tomography, Adaptation, Biological, Aspergillus, Osmotic Pressure, Stress, Physiological, Dexamethasone, Glucocorticoids, Precursor Cell Lymphoblastic Leukemia-Lymphoma, Sleep, Evolution, Molecular, Influenza A Virus, H1N1 Subtype, Acute Coronary Syndrome, Anti-Allergic Agents, Antibodies, Anti-Idiotypic, Antibodies, Monoclonal, Humanized, Pemphigoid, Bullous, Anthracyclines, Antigens, Neoplasm, DNA Topoisomerases, Type II, DNA-Binding Proteins, Proto-Oncogene Proteins c-bcl-2, Anticipation, Psychological, Choice Behavior, Gyrus Cinguli, Prefrontal Cortex, Reward, Nocturnal Myoclonus Syndrome, Restless Legs Syndrome, Electrocardiography, Electroencephalography, Polysomnography, Sleep Stages, Chromatin, Gene Library, High-Throughput Nucleotide Sequencing, RNA, Small Nuclear, Sequence Analysis, RNA, Circadian Rhythm, Light, Lighting, Sleep, Fermentation, Food Handling, Hot Temperature, Lipotropic Agents, Plants, Edible, Antipsychotic Agents, Mental Disorders, Sleep Apnea, Obstructive, Environmental Restoration and Remediation, Hydrocarbons, Chlorinated, Iron, Pesticides, Soil Pollutants, Brain Mapping, Databases as Topic, Internet, Brain Mapping, Databases as Topic, Information Storage and Retrieval, Environmental Monitoring, Models, Chemical, Silicates, Cannabinoids, Health Policy, Morals, Deuterium Exchange Measurement, Peptides, Tandem Mass Spectrometry, Magnetic Resonance Imaging, Ophthalmoplegia, Pain, Skin, Tea Tree Oil, Cholesterol, ErbB Receptors, Peptides, Phosphatidylcholines, Sphingomyelins, DNA Breaks, Single-Stranded, DNA Repair",Missing,"data sharing janssen has an agreement with the yale open data access (yoda) project to serve as the independent review panel for evaluation of requests for clinical study reports and participant-level data from investigators and physicians for scientific research that will advance medical knowledge and public health. data will be made available following publication and approval by yoda of any formal requests with a defined analysis plan. for more information on this process or to make a request, please visit  the yoda project site  the  data sharing policy of janssen  (pharmaceutical companies of johnson & johnson) is available online.",Method,Yes,No,N/A,N/A,N/A,N/A,Method,Yes,No,N/A,No,N/A,N/A,N/A,N/A
10/2/2020,2020,10.1186/s13148-020-0822-y,"Carcinoma, Squamous Cell, DNA Methylation, Epigenesis, Genetic, Human papillomavirus 16, Human papillomavirus 18, Uterine Cervical Neoplasms",Missing,"availability of data and materials raw data for this study were generated at tcga with cancer type of cesc and geo database with series id of gse20080, gse30758 and gse30759. derived data supporting the findings are available from the corresponding author [f.y.] on reasonable request.",Method,Yes,Yes,Online,N/A,"GSE30759, GSE20080, GSE30758",Gene Expression Omnibus,Method|Supplementary|Fulltext,Yes,No,N/A,No,N/A,N/A,N/A,N/A
31/3/2021,2021,10.1038/s41598-021-86755-5,"Plant Proteins, Prunus persica",Missing,N/A,Method,Yes,No,N/A,N/A,N/A,N/A,N/A,No,No,N/A,No,N/A,N/A,N/A,N/A
20/11/2021,2021,10.1186/s12870-021-03333-7,"Abscisic Acid, Oryza, Salt Stress, Salt Tolerance, Transcription Factors",Missing,availability of data and materials all the data supporting the conclusions of this article are provided within the article and in its additional files. all data and materials are available upon reasonable request from the corresponding author.,Method,Yes,Yes,Online,http://rapdb.dna.affrc.go.jp/,N/A,N/A,Method,Yes,No,N/A,No,N/A,N/A,N/A,N/A
15/10/2019,2019,10.15252/embj.2019102361,"DNA Breaks, Double-Stranded, DNA Repair, Homeostasis, Ubiquitin",Missing,N/A,Method,Yes,No,N/A,N/A,N/A,N/A,N/A,No,No,N/A,No,N/A,N/A,N/A,N/A
20/7/2021,2021,10.3390/molecules26144368,"Alcoholic Beverages, Flavoring Agents, Quercus, Sesquiterpenes, Wood",Missing,data availability statement not applicable.,Method,Yes,No,N/A,N/A,N/A,N/A,N/A,No,No,N/A,No,N/A,N/A,N/A,N/A
27/8/2020,2021,10.1007/s00520-020-05693-6,"Patient Reported Outcome Measures, Sleep",Missing,data availability the datasets generated and/or analyzed during the current study are available from the corresponding author on reasonable request.|code availability not applicable.,Method,Yes,No,N/A,N/A,N/A,N/A,DA,Yes,No,N/A,No,N/A,N/A,N/A,N/A
02/03/2020,2020,10.3390/molecules25051105,"Computational Biology, Cough, Gene Expression Profiling, Models, Biological, Protein Interaction Maps, Signal Transduction",Missing,N/A,Method,Yes,Yes,Online,https://www.mdpi.com/1420-3049/25/5/1105/s1,N/A,mdpi.com,Method|Fulltext,Yes,No,N/A,No,N/A,N/A,N/A,N/A
27/1/2021,2021,10.7150/thno.53828,"ATP Binding Cassette Transporter, Subfamily B, Member 1, Antineoplastic Agents, Phytogenic, Ovarian Neoplasms, Paclitaxel, RNA, Small Interfering",Missing,N/A,Method,Yes,No,N/A,N/A,N/A,N/A,N/A,No,No,N/A,No,N/A,N/A,N/A,N/A
17/6/2020,2020,10.1038/s41598-020-66872-3,"Disease Progression, Endometrial Neoplasms, Exosomes, Systems Biology",Missing,N/A,Method,Yes,No,N/A,"https://www.ncbi.nlm.nih.gov/geo/, https://cistrome.shinyapps.io/timer/",N/A,Gene Expression Omnibus,Method,Yes,No,N/A,No,N/A,N/A,N/A,N/A
21/1/2021,2021,10.1126/science.abe6959,"COVID-19 Vaccines, Health Priorities, Mass Vaccination",Missing,N/A,N/A,No,No,N/A,science.sciencemag.org/content/371/6532/916/suppl/dc1,N/A,N/A,N/A,No,No,N/A,Yes,10.1101/2020.09.08.20190629,2020/09/10,http://dx.doi.org/10.1101/2020.09.08.20190629,medRxiv
11/3/2019,2019,10.1038/s41598-019-40733-0,"Ecology, Germination, Introduced Species, Seeds",Missing,data availability all data was presented within this paper.,Method,Yes,No,N/A,N/A,N/A,N/A,N/A,No,No,N/A,No,N/A,N/A,N/A,N/A
25/11/2019,2019,10.1186/s12967-019-02142-9,"Body Mass Index, Ecosystem, Nonlinear Dynamics, Uric Acid",Missing,availability of data and materials all data generated or analyzed during this study are included in this published article.,Method,Yes,No,N/A,N/A,N/A,N/A,DA,Yes,No,N/A,No,N/A,N/A,N/A,N/A
21/6/2021,2021,10.1038/s41396-021-01014-9,"Iron, Microbiota",Missing,data availability the raw sequence data of this study were submitted to genbank short reads archive (sra) under the bioproject numbers prjna658241 and prjna668691 (biosample numbers samn16419039–samn16419043 and samn16419024–samn16419028). the environmental geochemical data were submitted to pangaea data publisher for earth & environmental science database under the following doi: 10.1594/pangaea.927101.,Method,Yes,Yes,Online,10.1594/pangaea.927101,"PRJNA658241, SAMN16419028, SAMN16419043, PRJNA668691","NCBI Bioproject, NCBI Biosample",Method,Yes,No,N/A,No,N/A,N/A,N/A,N/A
16/12/2020,2020,10.1038/s41598-020-78781-6,"Cell Wall, Gene Expression Regulation, Enzymologic, Gene Expression Regulation, Plant, Plant Proteins, Populus, Transcription Factors, Wood",Missing,N/A,Method,Yes,No,N/A,http://popgenie.org.To,N/A,N/A,Method,Yes,No,N/A,No,N/A,N/A,N/A,N/A
09/09/2021,2021,10.3390/nu13093147,"Athletes, Body Image, Gymnastics, Resistin",Missing,data availability statement the data presented in this study are available on a request from the corresponding author for researchers who meet the criteria for access to confidential data.,Method,Yes,No,N/A,N/A,N/A,N/A,N/A,No,No,N/A,No,N/A,N/A,N/A,N/A
1/12/2021,2021,10.1186/s12877-021-02610-2,"Cognitive Dysfunction, Hand Strength",Missing,"availability of data and materials the datasets analyzed during the current study are available in the klosa repository,  https://survey.keis.or.kr/eng/klosa/databoard/list.jsp",Method,Yes,Yes,Online,https://survey.keis.or.kr/eng/klosa/databoard/list.jsp,N/A,N/A,Method|Fulltext,Yes,No,N/A,Yes,10.21203/rs.3.rs-113965/v1,2020/12/01,http://dx.doi.org/10.21203/rs.3.rs-113965/v1,Research Square
01/10/2019,2019,10.1002/mbo3.938,"Acetates, Acetobacterium, Carbon Dioxide, Genome, Bacterial, Genomics, Metabolic Networks and Pathways",Missing,data availability statement all data regarding this analysis were deposited in ncbi under the bioproject  https://www.ncbi.nlm.nih.gov/bioproject/prjna509931,Method,Yes,Yes,Online,https://www.ncbi.nlm.nih.gov/bioproject/prjna509931,PRJNA509931,NCBI Bioproject,Method|Fulltext,Yes,No,N/A,No,N/A,N/A,N/A,N/A
02/04/2019,2019,10.1016/j.bbrc.2019.02.031,"Coenzyme A, Oxidative Stress, Protozoan Proteins",Missing,N/A,Method,Yes,No,N/A,N/A,N/A,N/A,N/A,No,No,N/A,No,N/A,N/A,N/A,N/A
24/8/2020,2020,10.3390/v12090927,"Herpesvirus 1, Bovine, Signal Transduction, Virus Replication",Missing,N/A,Method,Yes,No,N/A,N/A,N/A,N/A,N/A,No,No,N/A,No,N/A,N/A,N/A,N/A
4/9/2021,2021,10.1186/s12917-021-02994-8,"Diet, Gastrointestinal Microbiome, Horses",Missing,availability of data and materials all data generated or analysed during this study are included in this published article.,Method,Yes,No,N/A,N/A,N/A,N/A,Method,Yes,No,N/A,Yes,10.21203/rs.3.rs-506060/v1,2021/05/28,http://dx.doi.org/10.21203/rs.3.rs-506060/v1,Research Square
29/3/2021,2021,10.1155/2021/6688855,"Antioxidants, Myocardium, Polygonatum, Polysaccharides",Missing,data availability the data used to support the findings of this study are available from the corresponding author upon request.,Method,Yes,No,N/A,N/A,N/A,N/A,Fulltext,Yes,No,N/A,No,N/A,N/A,N/A,N/A
29/10/2020,2020,10.1155/2020/8786467,"HIV Infections, Information Technology, Models, Biological, Motivation, Sexual Behavior",Missing,data availability the datasets generated and/or analyzed during the current study are not publicly available due to ethical and legal reasons but are available from the corresponding author on reasonable request.,Method,Yes,No,N/A,N/A,N/A,N/A,N/A,No,No,N/A,No,N/A,N/A,N/A,N/A
22/10/2020,2021,10.1038/s41416-020-01123-w,"Antineoplastic Agents, Uterine Cervical Neoplasms",Missing,data availability all reagents used in this study were commercially available. the rna sequencing data have been deposited in ncbi bioproject database ( http://www.ncbi.nlm.nih.gov/bioproject/ ) under the accession number srp173984.,Method,Yes,Yes,Online,http://www.ncbi.nlm.nih.gov/bioproject/,SRP173984,NCBI Sequence Read Archive,Method|Fulltext,Yes,No,N/A,No,N/A,N/A,N/A,N/A
30/7/2020,2020,10.1007/s13304-020-00854-y,"Costs and Cost Analysis, Hepatectomy, Laparoscopy, Liver Neoplasms, Propensity Score",Missing,N/A,Method,Yes,No,N/A,N/A,N/A,N/A,Method,Yes,No,N/A,No,N/A,N/A,N/A,N/A
16/7/2021,2021,10.1186/s12976-021-00144-z,"COVID-19, Contact Tracing",Missing,availability of data and materials the original data used to construct the epidemic curve are available as  online supporting material .,Method,Yes,Yes,Online,N/A,N/A,N/A,N/A,No,No,N/A,No,N/A,N/A,N/A,N/A
7/4/2022,2022,10.1038/s41598-022-08033-2,Dinosaurs,Missing,N/A,Method,Yes,No,N/A,N/A,N/A,N/A,N/A,No,No,N/A,Yes,10.21203/rs.3.rs-1066311/v1,2021/11/23,http://dx.doi.org/10.21203/rs.3.rs-1066311/v1,Research Square
23/12/2020,2021,10.1111/jpc.15309,"Native Hawaiian or Other Pacific Islander, Racism",Missing,N/A,Method,Yes,No,N/A,N/A,N/A,N/A,N/A,No,No,N/A,No,N/A,N/A,N/A,N/A
14/7/2020,2020,10.1186/s13049-020-00760-7,"Arterial Pressure, Carbon Dioxide, Cardiopulmonary Resuscitation, Hypercapnia, Oxygen, Registries",Missing,availability of data and materials the datasets used and/or analysed during the current study are available from the corresponding author on reasonable request.,Method,Yes,Yes,Online,N/A,N/A,N/A,N/A,No,No,N/A,No,N/A,N/A,N/A,N/A
24/8/2020,2020,10.1186/s12913-020-05652-1,"Health Facilities, Maternal Health Services, Patient Acceptance of Health Care, Socioeconomic Factors",Missing,availability of data and materials data are available at ( https://www.dhsprogram.com/what-we-do/survey/survey-display-464.cfm ).,Method,Yes,Yes,Online,https://www.dhsprogram.com/what-we-do/survey/survey-display-464.cfm,N/A,Demographic and Health Surveys,N/A,No,Yes,Online,Yes,10.21203/rs.3.rs-18337/v1,2020/03/26,http://dx.doi.org/10.21203/rs.3.rs-18337/v1,Research Square
31/8/2021,2021,10.1038/s42003-021-02557-5,"Microbiota, Tumor Microenvironment",Missing,data availability all sequence data of rna-seq have been uploaded to ncbi gene expression omnibus database under accession number gse172356. the raw data for microbiome analysis is available on ncbi bioproject accession number: prjna719915. the raw unedited gel images are provided as supplementary figures. the processed data are available in supplementary data  1 – 3 . source data are provided in supplementary data  4 .|code availability the custom codes used in this study are provided via github at  https://github.com/withered-leaf/tm-pipeline .,Method,Yes,Yes,Supplementary Information|Online,https://github.com/withered-leaf/tm-pipeline,"GSE172356, PRJNA719915","Github ,  Gene Expression Omnibus, NCBI Bioproject",DA|Method|Fulltext,Yes,Yes,Online,No,N/A,N/A,N/A,N/A
20/9/2019,2019,10.1038/s41598-019-49656-2,"Alzheimer Disease, Forecasting",Missing,N/A,Method,Yes,Yes,Online,N/A,N/A,N/A,N/A,No,No,N/A,No,N/A,N/A,N/A,N/A
18/3/2019,2019,10.1016/j.cub.2019.01.077,"Grid Cells, Memory, Recognition, Psychology, Visual Perception",Missing,data and software availability code will be made available at  https://github.com/bicanski,Method,Yes,Yes,Online,https://github.com/bicanski,N/A,Github,DA|Method,Yes,Yes,Online,No,N/A,N/A,N/A,N/A
08/11/2020,2020,10.3390/ijms21218374,"Capsicum, Genes, Plant, Heat Shock Transcription Factors, Plant Proteins, Thermotolerance",Missing,N/A,Method,Yes,Yes,Online,https://www.mdpi.com/1422-0067/21/21/8374/s1,N/A,N/A,N/A,No,No,N/A,No,N/A,N/A,N/A,N/A
08/05/2020,2020,10.3390/molecules25092216,"Alkenes, Organometallic Compounds, Zirconium",Missing,N/A,Method,Yes,No,N/A,N/A,N/A,N/A,N/A,No,No,N/A,No,N/A,N/A,N/A,N/A
30/4/2019,2019,10.3390/ijms20092140,"Exosomes, Ischemic Postconditioning, Ischemic Preconditioning, Myocardial",Missing,N/A,Method,Yes,Yes,Online,https://www.mdpi.com/1422-0067/20/9/2140/s1,N/A,N/A,Method,Yes,No,N/A,No,N/A,N/A,N/A,N/A
04/06/2020,2020,10.3390/ijerph17114008,"Atrial Fibrillation, Education, Medical, Fibrinolytic Agents, Guideline Adherence, ""Practice Patterns, Physicians"", Stroke",Missing,N/A,Method,Yes,No,N/A,N/A,N/A,N/A,N/A,No,No,N/A,No,N/A,N/A,N/A,N/A
4/5/2020,2020,10.1038/s41467-020-16121-y,"Malaria, Falciparum, Plasmodium falciparum",Missing,source data   source data,Method,Yes,Yes,Online,"https://www.ncbi.nlm.nih.gov/sra/?term=prjna622655, https://www.ncbi.nlm.nih.gov/nuccore/mt160806, https://www.ncbi.nlm.nih.gov/nuccore/MT160806",PRJNA622655,"NCBI Sequence Read Archive, ncbi.nlm.nih.gov",Method,Yes,No,N/A,Yes,10.1101/799445,2019/10/10,http://dx.doi.org/10.1101/799445,bioRxiv
6/10/2020,2020,10.1038/s41598-020-72916-5,"Anguilla, Animal Migration, Behavior, Animal, Reproduction, Swimming",Missing,N/A,Method,Yes,No,N/A,N/A,N/A,N/A,N/A,No,No,N/A,No,N/A,N/A,N/A,N/A
23/7/2020,2020,10.1038/s41598-020-69037-4,"Cardiovascular Physiological Phenomena, Cardiovascular System, Computational Biology, Gene Ontology, Histocytochemistry",Missing,N/A,Method,Yes,No,N/A,http://biscar.univalle.edu.co/?page_id=1003,N/A,N/A,Method|Fulltext,Yes,No,N/A,No,N/A,N/A,N/A,N/A
18/2/2019,2019,10.1038/s41598-019-38665-w,"Communicable Disease Control, Decision Support Techniques, Disease Outbreaks, Emigration and Immigration, Models, Theoretical",Missing,"data availability the air traffic data used in this study is available for purchase from iata passenger intelligence services (paxis),  https://www.iata.org/services/statistics/intelligence/paxis . the population data is publically available from ornl’s landscan 55 , 58 , 61 ,  https://landscan.ornl.gov/ . h1n1 case data used for model calibration is publically available from cdc and who, and referenced in the supplementary materials.",Method,Yes,Yes,Online,"https://www.openstreetmap.org/copyright.The, https://www.iata.org/services/statistics/intelligence/paxis, https://qgis.org/, https://landscan.ornl.gov/",N/A,N/A,DA,Yes,Yes,Online,Yes,10.1101/414185,2018/09/13,http://dx.doi.org/10.1101/414185,bioRxiv
26/8/2021,2021,10.3390/genes12091314,HIV-1,Missing,"data availability statement the raw de-identified data supporting the conclusions of this article will be made available by the authors, without undue reservation, to any qualified researcher.",Method,Yes,No,N/A,N/A,N/A,N/A,N/A,No,No,N/A,No,N/A,N/A,N/A,N/A
13/10/2021,2021,10.1038/s41586-021-03968-4,Pan troglodytes,Missing,"data availability sequence data are available from the national center for biotechnology information sequence read archive, bioproject ( prjna664360 ) and biosample ( 16207289 – 16207321 ). biosample codes for all samples used in this study are given in the  supplementary data . other relevant data are available in the article and its  supplementary information .",Method,Yes,Yes,Online,http://PhyloPic.org/,PRJNA664360,NCBI Bioproject,DA,Yes,Yes,Online,Yes,10.1101/2020.11.10.374371,2020/11/11,http://dx.doi.org/10.1101/2020.11.10.374371,bioRxiv
11/4/2022,2022,10.1186/s12911-022-01824-7,"Data Accuracy, Electronic Health Records",Missing,"data collection the research data of all of the enrolled participants were collected from june to october 2021. the participants were the patients enrolled in the rws study. all the participants enrolled in that period were included in our study. a total of 90 participants were enrolled, including 19 participants in june, 9 in july, 0 in august (due to epidemic control reasons), 18 in september, and 44 in october.|availability of data and materials the datasets used and/or analyzed during the current study are available from the corresponding author on reasonable request.",Method,Yes,Yes,Online,N/A,N/A,N/A,Method,Yes,No,N/A,Yes,10.21203/rs.2.15993/v1,2019/10/14,http://dx.doi.org/10.21203/rs.2.15993/v1,Research Square
16/4/2020,2020,10.1155/2020/3280534,Shallots,Missing,data availability the data in this study are available from the corresponding author. anyone who needs the data in this study can ask the corresponding author by email.,Method,Yes,No,N/A,N/A,N/A,N/A,N/A,No,No,N/A,No,N/A,N/A,N/A,N/A
14/10/2020,2020,10.3390/molecules25204697,"Boron Neutron Capture Therapy, Morphinans",Missing,N/A,Method,Yes,No,N/A,N/A,N/A,N/A,Method|Fulltext,Yes,No,N/A,No,N/A,N/A,N/A,N/A
23/11/2020,2020,10.1186/s12879-020-05519-0,"Anthelmintics, Delivery of Health Care, Praziquantel, Schistosoma mansoni, Schistosomiasis mansoni",Missing,availability of data and materials the dataset analyzed for this study is available from the corresponding author (yilma chisha dea) on reasonable request. you can access the data set used for analysis which is attached as annex document in the manuscript tracking system.,Method,Yes,Yes,Online,N/A,N/A,N/A,N/A,No,No,N/A,Yes,10.21203/rs.3.rs-36301/v1,2020/06/18,http://dx.doi.org/10.21203/rs.3.rs-36301/v1,Research Square
13/11/2019,2019,10.1038/s41598-019-52640-5,"Contact Tracing, DNA, Bacterial, DNA, Ribosomal, Family Characteristics, Leprosy, Real-Time Polymerase Chain Reaction",Missing,N/A,Method,Yes,No,N/A,N/A,N/A,N/A,N/A,No,No,N/A,No,N/A,N/A,N/A,N/A
12/1/2021,2021,10.1038/s41598-020-80500-0,"Brain, Crowding, Decision Making, Judgment, Mass Behavior, Perception",Missing,data and code availability analysis codes and related resources are publicly available here: (10.6084/m9.figshare.13276778). further details and requests for additional resources should be directed to koel das (koel.das@iiserkol.ac.in).,Method,Yes,Yes,Online,10.6084/m9.figshare.13276778,N/A,figshare,DA|Method|Fulltext,Yes,Yes,Online,No,N/A,N/A,N/A,N/A
28/4/2021,2021,10.1128/mSphere.01232-20,"Antibodies, Bacterial, Cholera, Immunologic Memory, Neuraminidase, Vibrio cholerae O1",Bangladesh,N/A,Method,Yes,No,N/A,N/A,N/A,N/A,N/A,No,No,N/A,No,N/A,N/A,N/A,N/A
20/7/2020,2020,10.1016/j.cub.2020.05.021,"Cytokinesis, Endosomal Sorting Complexes Required for Transport, Hot Temperature, Molecular Imaging",Missing,materials availability all unique/stable reagents generated in this study are available from the lead contact without restriction.|data and code availability this study did not generate any unique dataset or code.,Method,Yes,Yes,Online,st.dev/median,N/A,N/A,DA,Yes,Yes,Online,Yes,10.1101/2020.02.18.953042,2020/02/19,http://dx.doi.org/10.1101/2020.02.18.953042,bioRxiv
04/12/2019,2019,10.3390/ijerph16244880,"Exercise, Psychometrics",Missing,N/A,Method,Yes,No,N/A,N/A,N/A,N/A,N/A,No,No,N/A,Yes,10.20944/preprints201906.0058.v1,2019/06/10,http://dx.doi.org/10.20944/preprints201906.0058.v1,Preprints.org
7/2019,2019,10.1016/j.nbd.2019.03.018,None,Missing,N/A,Method,Yes,No,N/A,N/A,N/A,N/A,Method,Yes,No,N/A,No,N/A,N/A,N/A,N/A
3/6/2019,2019,10.1038/s41467-019-10268-z,"Acetylcholine, Amacrine Cells, Motion Perception, Retinal Ganglion Cells, Synapses, Vision, Ocular, gamma-Aminobutyric Acid",Missing,data availability all relevant data generated and analyzed in this study are available from the authors on reasonable request.,Method,Yes,Yes,Online,N/A,N/A,N/A,Method,Yes,No,N/A,No,N/A,N/A,N/A,N/A
31/3/2020,2020,10.1186/s12913-020-05138-0,"Disabled Persons, Health Services Accessibility, Students, Universal Health Insurance",Missing,availability of data and materials the datasets analyzed during the current study is available from the corresponding author on reasonable request.,Method,Yes,Yes,Online,N/A,N/A,N/A,N/A,No,No,N/A,Yes,10.21203/rs.2.16285/v2,2019/12/23,http://dx.doi.org/10.21203/rs.2.16285/v2,Research Square
5/11/2020,2020,10.1038/s41598-020-76091-5,Islets of Langerhans,Missing,data availability the datasets generated during and/or analysed during the current study are available from the corresponding author on reasonable request.,Method,Yes,Yes,Online,N/A,N/A,N/A,N/A,No,No,N/A,No,N/A,N/A,N/A,N/A
22/5/2019,2019,10.1186/s12889-019-6981-0,"Health Knowledge, Attitudes, Practice, Urban Population",Missing,availability of data and materials the datasets analyzed during the study are available from the corresponding author on reasonable request.,Method,Yes,No,N/A,N/A,N/A,N/A,N/A,No,No,N/A,No,N/A,N/A,N/A,N/A
16/05/2021,2021,10.1021/acs.bioconjchem.1c00187,"Fullerenes, Nucleic Acids",Missing,N/A,N/A,No,Yes,Online,https://pubs.acs.org/doi/10.1021/acs.bioconjchem.1c00187,N/A,N/A,N/A,No,No,N/A,No,N/A,N/A,N/A,N/A
12/4/2020,2020,10.3390/ijerph17082645,"Boredom, Educational Personnel, Students",Missing,N/A,Method,Yes,No,N/A,N/A,N/A,N/A,N/A,No,No,N/A,No,N/A,N/A,N/A,N/A
12/10/2021,2021,10.1155/2021/2610122,"Cetylpyridinium, Chlorhexidine, Ethanol, Sodium Fluoride",Missing,data availability the data used to support the findings of this study are included within the article.,Method,Yes,No,N/A,N/A,N/A,N/A,N/A,No,No,N/A,No,N/A,N/A,N/A,N/A
30/8/2019,2019,10.3390/ijms20174257,"Agrobacterium, CRISPR-Associated Protein 9, CRISPR-Cas Systems, Inheritance Patterns, Mutagenesis, Triticum",Missing,N/A,Method,Yes,Yes,Online,https://www.mdpi.com/1422-0067/20/17/4257/s1,N/A,N/A,N/A,No,No,N/A,No,N/A,N/A,N/A,N/A
12/11/2019,2020,10.1007/s12035-019-01799-z,"Alzheimer Disease, Amyloid beta-Protein Precursor, Brain Ischemia, CA3 Region, Hippocampal, tau Proteins",Missing,N/A,Method,Yes,No,N/A,N/A,N/A,N/A,N/A,No,No,N/A,No,N/A,N/A,N/A,N/A
19/8/2020,2020,10.1038/s41598-020-71023-9,"Betacoronavirus, Coronavirus Infections, Models, Statistical, Pneumonia, Viral, Quarantine",Missing,code availability the r code that supports the findings of this study is available from the author on request.,Method,Yes,Yes,Online,"https://www.who.int/docs/default-source/coronaviruse/situation-reports/20200211-sitrep-22-ncov.pdf?sfvrsn=fb6d49b1_2, https://www.r-project.org",N/A,World Health Organization,DA|Method|Fulltext,Yes,Yes,Online,Yes,10.1101/2020.03.01.20029645,2020/03/06,http://dx.doi.org/10.1101/2020.03.01.20029645,medRxiv
3/2/2020,2020,10.7150/thno.40128,"Anti-Inflammatory Agents, Inflammasomes, Liver Failure, Acute, NLR Family, Pyrin Domain-Containing 3 Protein, Oleanolic Acid, Protective Agents, Saponins, Transcription Factors",Missing,N/A,Method,Yes,No,N/A,N/A,N/A,N/A,Method|Fulltext,Yes,No,N/A,No,N/A,N/A,N/A,N/A
4/2/2020,2020,10.1038/s41398-020-0732-y,"Bipolar Disorder, RGS Proteins",Missing,N/A,Method,Yes,No,N/A,N/A,N/A,N/A,Method,Yes,No,N/A,No,N/A,N/A,N/A,N/A
8/6/2019,2019,10.1007/s12311-019-01047-z,"Cerebellum, Healthy Volunteers, Inhibition, Psychological, Reaction Time, Transcranial Direct Current Stimulation",Missing,N/A,Method,Yes,No,N/A,N/A,N/A,N/A,Method,Yes,No,N/A,No,N/A,N/A,N/A,N/A
13/4/2020,2020,10.1186/s12891-020-03234-0,"Disasters, Earthquakes, Low Back Pain, Musculoskeletal Pain, Survivors",Missing,availability of data and materials the datasets used and/or analysed during the current study are available from the corresponding author on reasonable request.,Method,Yes,No,N/A,N/A,N/A,N/A,N/A,No,No,N/A,Yes,10.21203/rs.2.21418/v2,2020/03/25,http://dx.doi.org/10.21203/rs.2.21418/v2,Research Square
20/9/2021,2021,10.3390/ijms221810143,Secondary Metabolism,Missing,data availability statement the lc-ms raw data are available upon request.,Method,Yes,Yes,Online,"www.mdpi.com/article/10.3390/ijms221810143/s1, 10.3390/ijms221810143/s1",N/A,N/A,Method,Yes,No,N/A,No,N/A,N/A,N/A,N/A
17/1/2022,2022,10.1152/ajprenal.00375.2021,None,Missing,N/A,Method,Yes,No,N/A,N/A,N/A,N/A,N/A,No,No,N/A,No,N/A,N/A,N/A,N/A
20/6/2019,2019,10.1038/s41598-019-45544-x,"Giardia, Interleukin-17",Missing,N/A,Method,Yes,No,N/A,N/A,N/A,N/A,N/A,No,No,N/A,No,N/A,N/A,N/A,N/A
24/1/2020,2020,10.1038/s41467-020-14368-z,"Brain, Macaca mulatta",Missing,"data availability sequencing data are available at the geo under accession  gse128537 . the source data underlying figs.  1e ,  2a–c ,  3a ,  3c–e ,  4a ,  4d  and  5a, b  and supplementary figs.  1c, d ,  2a ,  c ,  3a–c ,  4a–h ,  5c–e ,  6a–c ,  7e–f  and  8a–d  are provided as a source data file.|code availability the r source code for data analysis and visualization in this study can be found at  https://github.com/keyinglu/rhesus-macaque-brain .",Method,Yes,Yes,Online,https://github.com/keyinglu/rhesus-macaque-brain,GSE128537,"Github ,  Gene Expression Omnibus",DA|Method|Fulltext,Yes,Yes,Online,No,N/A,N/A,N/A,N/A
12/2/2022,2022,10.3390/molecules27041246,"Anti-Infective Agents, Antineoplastic Agents, Antioxidants, Benzothiazoles, Microwaves",Missing,data availability statement the data presented in this study are available.,Method,Yes,No,N/A,N/A,N/A,N/A,N/A,No,No,N/A,No,N/A,N/A,N/A,N/A
28/4/2020,2020,10.1002/acn3.51042,"Muscular Dystrophies, Limb-Girdle, Pentosyltransferases, Registries, Walker-Warburg Syndrome",Missing,N/A,Method,Yes,No,N/A,N/A,N/A,N/A,Method|Fulltext,Yes,No,N/A,No,N/A,N/A,N/A,N/A
30/7/2020,2020,10.3390/nu12082294,"Adolescent Health, Body Mass Index, Breakfast, Diet, Healthy, Diet, Reducing, Exercise",Missing,N/A,Method,Yes,No,N/A,N/A,N/A,N/A,N/A,No,No,N/A,No,N/A,N/A,N/A,N/A
04/11/2020,2020,10.7554/eLife.60669,"Escherichia coli, Gene Expression Regulation, Bacterial",United Kingdom,data availability all data generated or analysed during this study are included in the manuscript and supplementary information. information regarding statistical testing is located in materials and methods and corresponding figure legends.,Method,Yes,No,N/A,N/A,N/A,N/A,N/A,No,No,N/A,Yes,10.1101/589077,2019/03/28,http://dx.doi.org/10.1101/589077,bioRxiv
30/7/2021,2021,10.3390/ijms22158206,"Immunoglobulin G, Lung Transplantation, Phagocytosis",Missing,data availability statement the data presented in this study are available on request from the corresponding author. the data are not publicly available due to privacy restrictions.,Method,Yes,Yes,Online,"https://www.mdpi.com/article/10.3390/ijms22158206/s1, 10.3390/ijms22158206/s1",N/A,N/A,N/A,No,No,N/A,No,N/A,N/A,N/A,N/A
12/3/2021,2021,10.1186/s41235-021-00282-5,"Dermatoglyphics, Learning",Missing,"availability of data and materials the data for each novice and expert participant, and the code used to produce our results and plots, are available on the open science framework, with the exception of identifiable demographic information (experiment 1:  https://osf.io/azesx  experiment 2:  https://osf.io/aphxg ). the images, experimental software, event sequences can also be found through these links.",Method,Yes,Yes,Online,"https://osf.io/azesx, https://osf.io/aphxg",N/A,Open Science Framework,DA,Yes,Yes,Online,Yes,10.31234/osf.io/wdzmq,2020/08/03,http://dx.doi.org/10.31234/osf.io/wdzmq,PsyArXiv
13/8/2020,2020,10.3390/medicina56080411,"Critical Care, Critical Illness, Delirium, Hypnotics and Sedatives, Neurologic Examination, Respiration, Artificial",Missing,N/A,Method,Yes,No,N/A,N/A,N/A,N/A,N/A,No,No,N/A,No,N/A,N/A,N/A,N/A
9/9/2021,2021,10.1186/s10020-021-00356-6,"COVID-19, Lung, Organoids, SARS-CoV-2",Missing,availability of data and materials the transcriptional signature associated with sars-cov-2 infection in a549 cells was obtained from the blanco-melo et al .  ( 2020 ) study. the l1000 database was accessed via  https://clue.io . the source of the drug structures analyzed in the chemoinformatic analyses is listed in additional file  1 : table s3.,Method,Yes,Yes,Online,https://clue.io,N/A,N/A,Method,Yes,No,N/A,Yes,10.26434/chemrxiv.12148764.v1,2020/04/21,http://dx.doi.org/10.26434/chemrxiv.12148764.v1,ChemRxiv
22/3/2022,2022,10.1038/s41598-022-08952-0,"Influenza A Virus, H1N1 Subtype, Influenza Vaccines, Influenza, Human, Pulmonary Disease, Chronic Obstructive",Missing,N/A,Method,Yes,No,N/A,N/A,N/A,N/A,N/A,No,No,N/A,No,N/A,N/A,N/A,N/A
28/4/2020,2020,10.1038/s41598-020-64031-2,"Alpha-Ketoglutarate-Dependent Dioxygenase FTO, Cholesterol Ester Transfer Proteins, Chromosomes, Human, Pair 16, Metabolic Syndrome, Pediatric Obesity, Polymorphism, Single Nucleotide",Missing,data availability the authors declare that the data supporting the findings of this study are available within the article and its supplementary information files.,Method,Yes,Yes,Online,N/A,N/A,N/A,Method|Fulltext,Yes,No,N/A,No,N/A,N/A,N/A,N/A
4/11/2020,2020,10.1186/s12889-020-09725-y,"Child Behavior, Exercise, Health Promotion, Schools, Sedentary Behavior",Missing,"availability of data and materials data can be accessed upon request. contact person is eivind andersen, eivind.andersen@usn.no",Method,Yes,No,N/A,N/A,N/A,N/A,N/A,No,No,N/A,Yes,10.21203/rs.2.20003/v4,2020/10/28,http://dx.doi.org/10.21203/rs.2.20003/v4,Research Square
4/2/2019,2019,10.1038/s41598-018-37963-z,"Macaca, Spine, Tail",Missing,N/A,Method,Yes,No,N/A,N/A,N/A,N/A,N/A,No,No,N/A,No,N/A,N/A,N/A,N/A
19/3/2019,2019,10.3390/ijerph16060987,"Eutrophication, Oxygen, Water, Water Quality, Water Supply",Missing,N/A,Method,Yes,Yes,Online,https://www.mdpi.com/1660-4601/16/6/987/s1,N/A,N/A,N/A,No,No,N/A,No,N/A,N/A,N/A,N/A
28/9/2020,2020,10.1038/s41467-020-18705-0,"DNA Damage, DNA Repair, Ubiquitin",Missing,source data source data|data availability source data underlying figs.  1 – 6  and all supplementary figs. are provided as a source data file with this paper. any other data are available from the corresponding author upon reasonable request. source data are provided with this paper.,Method,Yes,Yes,Online,N/A,N/A,N/A,N/A,No,No,N/A,No,N/A,N/A,N/A,N/A
11/9/2019,2019,10.1186/s13071-019-3702-6,"Antinematodal Agents, Azetidines, Chemoprevention, Dirofilariasis, Dog Diseases, Macrolides, Pyrantel, Spiro Compounds",Missing,availability of data and materials the dataset supporting the conclusions of this article is included within the article.,Method,Yes,No,N/A,N/A,N/A,N/A,Method,Yes,No,N/A,No,N/A,N/A,N/A,N/A
28/2/2019,2019,10.1038/s41598-019-39377-x,"Anopheles, Ecological Parameter Monitoring, Insect Bites and Stings, Malaria, Models, Statistical",Missing,N/A,Method,Yes,Yes,Online,N/A,N/A,N/A,N/A,No,No,N/A,No,N/A,N/A,N/A,N/A
23/2/2022,2022,10.1128/spectrum.02589-21,Biofilms,Belgium,data availability. all data will be made available from the corresponding author upon request.,Method,Yes,No,N/A,N/A,N/A,N/A,N/A,No,No,N/A,No,N/A,N/A,N/A,N/A
23/6/2020,2020,10.1186/s12879-020-05157-6,"Antitubercular Agents, Drug Resistance, Multiple, Bacterial, Fluoroquinolones, Isoniazid, Mycobacterium tuberculosis, Rifampin, Tuberculosis, Multidrug-Resistant",Missing,availability of data and materials all data generated or analyzed during this study are included in this published article.,Method,Yes,Yes,Online,policies.MDR/RR-TB,N/A,N/A,N/A,No,No,N/A,Yes,10.21203/rs.3.rs-17875/v1,2020/03/19,http://dx.doi.org/10.21203/rs.3.rs-17875/v1,Research Square
8/2/2021,2021,10.1038/s41598-021-82061-2,"Cat Diseases, Dog Diseases, Gram-Negative Bacteria, Gram-Negative Bacterial Infections, beta-Lactam Resistance",Missing,N/A,Method,Yes,No,N/A,N/A,N/A,N/A,Method,Yes,No,N/A,No,N/A,N/A,N/A,N/A
30/6/2021,2021,10.3390/ijms22137078,"Gene Expression Regulation, Enzymologic, Glutamate Decarboxylase, MicroRNAs, Retina",Missing,"data availability statement the data presented in this study are available in  supplementary materials (figures s1 and s2, tables s1 and s2) .",Method,Yes,Yes,Online,"10.3390/ijms22137078/s1, https://www.mdpi.com/article/10.3390/ijms22137078/s1",N/A,N/A,Method|Supplementary,Yes,No,N/A,No,N/A,N/A,N/A,N/A
17/11/2021,2021,10.2196/30642,"COVID-19, Social Media",United States of America,data availability the data are available at github [ 15 ].,Method,Yes,Yes,N/A,N/A,N/A,N/A,Method,Yes,No,N/A,Yes,10.2196/preprints.30642,2021/05/24,http://dx.doi.org/10.2196/preprints.30642,Journal of Medical Internet Research
04/10/2019,2019,10.3390/nu11102368,"Bariatric Surgery, Caloric Restriction, Diet, Ketogenic, Fibronectins, Interleukin-8, Matrix Metalloproteinase 2, Muscle, Skeletal",Missing,N/A,Method,Yes,Yes,Online,https://www.mdpi.com/2072-6643/11/10/2368/s1,N/A,N/A,Method|Fulltext,Yes,No,N/A,No,N/A,N/A,N/A,N/A
30/3/2022,2022,10.1155/2022/3494262,"Brain Ischemia, MicroRNAs, NADPH Oxidase 4, Neuroprotective Agents, Reperfusion Injury",Missing,data availability the data used to support the findings are available from the corresponding author upon request.,Method,Yes,No,N/A,N/A,N/A,N/A,Method,Yes,No,N/A,No,N/A,N/A,N/A,N/A
25/5/2021,2021,10.1038/s41419-021-03831-4,"Oocytes, RNA Processing, Post-Transcriptional, RNA, Long Noncoding",Missing,N/A,Method,Yes,No,N/A,N/A,N/A,N/A,N/A,No,No,N/A,No,N/A,N/A,N/A,N/A
1/6/2020,2020,10.1080/16549716.2020.1765526,"Data Accuracy, Data Collection, Documentation, Medical Records",Missing,"study design and data collection from april 22nd, 2018, to may 1st, 2018, we retrospectively reviewed the medical records of surgical and obstetric patients who were diagnosed with ssi and sepsis during the three-month baseline period. during the two weeks, data collectors searched independently for patient files in the medical records departments and surgical wards, and then a member of the research team and a data collector from each of the facilities searched together on a designated chart review day. at this point, if the patient files were not found, then it was considered ‘not found.’ the level completeness of the medical records was assessed by evaluating the rates of 1) documentation of ssi or sepsis and their respective symptoms and vitals, 2) patient daily monitoring and progress information, and 3) documentation of key patient demographics. a ‘complete’ medical record included all of these three components. to operationalize documentation of ssi, we defined ssi as ‘pus draining from the wound,’ ‘closed wound opened,’ ‘wound with a foul smell,’ and ‘wound infection [ 19 ].’ since post-operative complication documentation mechanisms are not uniform across region or health facility, we developed separate criteria to assess documentation of these three components in medical records and, thus, completeness of a medical record ( table 1 ). table 1. criteria developed to assess the completeness of medical records. documentation of ssi/sepsis diagnosis documentation of ssi: the clinician’s notes include any combination of the following keywords ‘pus draining from the wound,’ ‘closed wound opened,’ ‘wound with a foul smell,’ and ‘wound infection’  1  and, 1 or more of the following symptoms: heat, redness, localized tenderness, purulent drainage, spontaneous dehiscence, operative findings indicative of infection. documentation of sepsis: the clinician’s notes include a keyword ‘sepsis’ and 2 or more of the following criteria: temperature, heart rate, systolic blood pressure, and respiratory rate. we evaluated the presence of recording, not accuracy of measurement. patient progress and monitoring documentation of the following patient progress and monitoring information: daily progress notes documented for each inpatient day*, doctors’ orders documented on each inpatient day, partograph present and completed during the perinatal period, discharge details documented (discharge, referral, or death date); post-operative notes documented*, indication for cesarean section documented. patient characteristics documentation of the following patient characteristics: patient history (obstetric admission sheet for obstetric patients), name, age, sex. *daily progress notes documented for each inpatient day were written by assistant medical officers/surgeons or another clinical person. post-operative notes were written by the surgeon directly after the operation.   to examine the level of completion of medical records, we developed a data quality assessment (dqa) tool which included 18 questions addressing three main areas: 1) documentation of ssi, sepsis and their respective symptoms and vitals (questions: 14, 15, 16), 2) patient daily monitoring and progress (questions: 5, 6,7, 11, 12), and 3) patient characteristics (questions: 3, 4). ( appendix ii ). the tool was developed by the research team and was informed by the world health organization (who) western pacific region’s medical records manual: a guide for developing countries [ 20 ]. development of the tool was also informed by 5 or 6 semi-structured interviews with key stakeholders (i.e. surgical providers, chief medical officers, surgical nurses, and data managers) by members of the research team to understand data flow from the facility to the national level.",Method,Yes,Yes,Online,10.1016/j.jamcollsurg.2018.03.020,N/A,N/A,N/A,No,No,N/A,No,N/A,N/A,N/A,N/A
28/11/2019,2019,10.2807/1560-7917.ES.2019.24.48.1900244,"Antibodies, Neutralizing, Camelus, Disease Reservoirs, Occupational Exposure, Zoonoses",Missing,N/A,Method,Yes,No,N/A,N/A,N/A,N/A,N/A,No,No,N/A,No,N/A,N/A,N/A,N/A
16/11/2020,2020,10.1038/s41598-020-76931-4,"Food Preservation, Meat Products, Pork Meat",Missing,N/A,Method,Yes,No,N/A,N/A,N/A,N/A,N/A,No,No,N/A,No,N/A,N/A,N/A,N/A
15/3/2019,2019,10.4155/bio-2018-0202,"Blood, Chromatography, Liquid, Dried Blood Spot Testing, Tandem Mass Spectrometry",Missing,N/A,Method,Yes,No,N/A,N/A,N/A,N/A,N/A,No,No,N/A,No,N/A,N/A,N/A,N/A
4/5/2019,2019,10.1186/s12871-019-0739-1,"Dexmedetomidine, Lidocaine, Pain Measurement, Thyroid Gland",Missing,availability of data and materials the datasets used and/or analyzed during the current study are available from the corresponding author on reasonable request.,Method,Yes,No,N/A,N/A,N/A,N/A,Method,Yes,No,N/A,Yes,10.21203/rs.2.216/v2,2019/03/13,http://dx.doi.org/10.21203/rs.2.216/v2,Research Square
4/3/2020,2020,10.1007/s00192-020-04253-0,"Pelvic Floor, Urinary Incontinence",Missing,N/A,Method,Yes,No,N/A,www.continence.org.au,N/A,N/A,Method|Fulltext,Yes,No,N/A,No,N/A,N/A,N/A,N/A
4/8/2019,2019,10.1155/2019/4589060,"Algorithms, Motion Pictures, Nerve Net, Neural Networks, Computer, Social Media",Missing,data availability the data used to support the findings of this study are available from the corresponding author upon request.,N/A,No,Yes,Online,"https://NLTK.Stem.WordNetlemmatizer, https://sentic.net, https://NLTK.Tokenize.WordPunctTokenizer, http://www.ling.upenn.edu/courses/Fall_2003/ling001/penn_treebank_pos.html, https://en.wikipedia.org/wiki/Cosine_similarity, https://en.wikipedia.org/wiki/Artificial_neural_network, https://stanfordnlp.github.io/CoreNLP.4.5, https://NLTK.Tokenize.WhiteSpaceTokenizer, http://www.eqo.info, https://NLTK.Tokenize.TreeBankWordTokenizer, http://www.findme.com.ph, https://jmars.asu.edu/",N/A,N/A,Fulltext,Yes,No,N/A,No,N/A,N/A,N/A,N/A
15/10/2021,2021,10.1038/s41598-021-00119-7,"Liver Cirrhosis, Pyruvaldehyde",Missing,data availability the data presented in this study are available on request from the corresponding authors.,Method,Yes,Yes,Online,N/A,N/A,N/A,N/A,No,No,N/A,No,N/A,N/A,N/A,N/A
26/8/2021,2021,10.1038/s41598-021-96404-6,"Endangered Species, Genomics, Hybridization, Genetic, Nanopore Sequencing",Missing,N/A,Method,Yes,No,N/A,"https://arriveguidelines.org/resources/questionnaire, https://community.nanoporetech.com, https://www.protocols.io/view/isolation-of-high-quality-highly-enriched-mitochon-mycc7sw, http://iqtree.cibiv.univie.ac.at, http://www.iucnredlist.org/technical-documents/spatial-data",N/A,"Protocols.io, arriveguidelines.org",Method|Fulltext,Yes,No,N/A,Yes,10.1101/2021.04.16.440058,2021/04/18,http://dx.doi.org/10.1101/2021.04.16.440058,bioRxiv
24/3/2021,2021,10.1186/s12964-021-00729-8,"Apoptosis, Biomarkers, Tumor, Lysosomal-Associated Membrane Protein 2, Nuclear Receptor Co-Repressor 1, Proteolysis",Missing,availability of data and materials the datasets used and/or analysed during the current study are available from the corresponding author on reasonable request.,Method,Yes,Yes,Online,N/A,N/A,N/A,N/A,No,No,N/A,Yes,10.21203/rs.3.rs-88752/v1,2020/10/09,http://dx.doi.org/10.21203/rs.3.rs-88752/v1,Research Square
12/1/2021,2021,10.1038/s41598-020-79836-4,"Ampulla of Vater, Sphincterotomy, Endoscopic",Missing,N/A,Method,Yes,No,N/A,N/A,N/A,N/A,N/A,No,No,N/A,No,N/A,N/A,N/A,N/A
18/2/2020,2020,10.1007/s00216-020-02503-0,"Biosensing Techniques, DNA, Fluorescent Dyes, Liposomes, Magnetite Nanoparticles",Missing,N/A,Method,Yes,No,N/A,N/A,N/A,N/A,N/A,No,No,N/A,No,N/A,N/A,N/A,N/A
21/1/2020,2020,10.1136/jech-2019-213093,"Ethnicity, Infant Mortality, Premature Birth, Transients and Migrants",United Kingdom,"data statutory birth and death registration data for england and wales were linked to the national health service numbers for babies (nn4b) birth notifications system by the office for national statistics (ons). the nn4b system included additional characteristics such as ethnic group of babies and gestational age at birth, which were not collected at birth registration. the data linkage and its evaluation have been described elsewhere. 18 19  observations with birth weight exceeding twice the iqr above or below the median within each sex-gestation-ethnic group stratum, and those with gestational age greater than 43 weeks, were removed from the data set as these values were deemed implausible. observations with missing birth weight were also removed, as it was not possible to evaluate whether they met the criteria for inclusion.",Method,Yes,No,N/A,N/A,N/A,N/A,N/A,No,No,N/A,No,N/A,N/A,N/A,N/A
15/4/2022,2022,10.3390/ijerph19084796,"Rape, Sex Offenses, Stress Disorders, Post-Traumatic",Missing,data availability statement data are not available due to the sensitive nature of the study.,Method,Yes,No,N/A,N/A,N/A,N/A,Method,Yes,No,N/A,No,N/A,N/A,N/A,N/A
27/7/2020,2020,10.1080/22221751.2020.1791737,"Antigens, Viral, Betacoronavirus, Proteomics, Viral Vaccines, Virion",Missing,N/A,Method,Yes,No,N/A,N/A,N/A,N/A,Method|Fulltext,Yes,No,N/A,Yes,10.1101/2020.04.17.046193,2020/04/18,http://dx.doi.org/10.1101/2020.04.17.046193,bioRxiv
2/8/2021,2021,10.1038/s41419-021-03985-1,"Apolipoprotein L1, Apoptosis, Receptor, Notch1, Signal Transduction",Missing,data availability the datasets supporting the conclusions of this article are included within the article and its additional files.,Method,Yes,Yes,Online,http://kmplot.com/analysis,N/A,N/A,Method|Fulltext,Yes,No,N/A,No,N/A,N/A,N/A,N/A
12/3/2021,2021,10.1186/s12883-021-02142-7,None,Missing,availability of data and materials the datasets used and analyzed during the current study are available from the corresponding author on reasonable request.,Method,Yes,No,N/A,N/A,N/A,N/A,N/A,No,No,N/A,Yes,10.21203/rs.3.rs-38307/v2,2020/09/22,http://dx.doi.org/10.21203/rs.3.rs-38307/v2,Research Square
08/08/2019,2019,10.1016/j.cell.2019.07.029,"Carbohydrate Metabolism, Drosophila melanogaster, Eating, Intestinal Mucosa, Sex Characteristics, Sperm Maturation",Missing,"lead contact and materials availability further information and requests for resources and reagents (such as newly generated  drosophila  stocks) should be directed to and will be fulfilled by the lead contact, irene miguel-aliaga ( i.miguel-aliaga@imperial.ac.uk ).|data and code availability the accession number for gene expression reported in this paper is geo:  gse74775 . data in this paper are available upon request to the lead contact.",Method,Yes,Yes,Online,N/A,GSE74775,Gene Expression Omnibus,DA|Method|Fulltext,Yes,No,N/A,No,N/A,N/A,N/A,N/A
7/11/2019,2019,10.1038/s41598-019-52803-4,"Benign Paroxysmal Positional Vertigo, Registries, Seasons, Vitamin D",Missing,data availability the datasets generated during and analysed during the current study are available from the corresponding author on reasonable request.,Method,Yes,Yes,Online,N/A,N/A,N/A,N/A,No,No,N/A,No,N/A,N/A,N/A,N/A
20/9/2019,2021,10.1080/09553002.2019.1665214,"Medical Countermeasures, Radiation Injuries, Radiation Protection, Space Flight",Missing,N/A,N/A,No,No,N/A,https://rrp.cancer.gov/default.htm,N/A,N/A,N/A,No,No,N/A,No,N/A,N/A,N/A,N/A
11/2020,2020,10.1016/j.infbeh.2020.101503,"Child Development, Culture, Facial Recognition",Missing,N/A,Method,Yes,Yes,Online,"10.13039/501100001691Japan, 10.13039/501100007155Medical",N/A,N/A,Method,Yes,No,N/A,No,N/A,N/A,N/A,N/A
19/11/2020,2020,10.1038/s41467-020-19637-5,Genetic Predisposition to Disease,Missing,source data source data,Method,Yes,Yes,Online,"https://www.danishhealthdata.com/find-health-data/den-nationale-skizofrenidatabase, https://mouse.brain-map.org/gene/show/18302",GSE145915,N/A,Method|Fulltext,Yes,No,N/A,No,N/A,N/A,N/A,N/A
24/9/2019,2019,10.3390/genes10100742,"Chromosomes, Plant, Oryza, Plant Proteins, Salt Tolerance",Missing,N/A,Method,Yes,Yes,Online,"http://www.cytoscape.org/, https://www.mdpi.com/2073-4425/10/10/742/s1",N/A,N/A,Method|Fulltext,Yes,No,N/A,No,N/A,N/A,N/A,N/A
5/3/2019,2019,10.1186/s12955-019-1110-4,"Caregivers, Grief, Palliative Care, Quality of Life",Missing,availability of data and materials please contact the authors for data requests.,Method,Yes,No,N/A,N/A,N/A,N/A,N/A,No,No,N/A,No,N/A,N/A,N/A,N/A
1/2020,2020,10.3201/eid2601.181998,"Animals, Wild, Antelopes, Disease Outbreaks, Endangered Species, Peste-des-Petits-Ruminants, Peste-des-petits-ruminants virus",Missing,N/A,Method,Yes,No,N/A,10.6084/m9.figshare.7502258.v1,N/A,figshare,Method,Yes,No,N/A,No,N/A,N/A,N/A,N/A
14/1/2019,2019,10.1007/s00429-019-01828-6,"Brain Mapping, Imagination, Visual Perception, Vocabulary",Missing,N/A,Method,Yes,No,N/A,N/A,N/A,N/A,Method,Yes,No,N/A,Yes,10.1101/277020,2018/03/06,http://dx.doi.org/10.1101/277020,bioRxiv
16/3/2021,2021,10.1186/s12888-021-03158-6,"Depression, Postpartum, Stress Disorders, Post-Traumatic",Missing,availability of data and materials the datasets used and/or analysed during the current study are available from the corresponding author on reasonable request.,Method,Yes,No,N/A,N/A,N/A,N/A,N/A,No,No,N/A,No,N/A,N/A,N/A,N/A
23/8/2021,2021,10.1186/s12885-021-08646-2,"Bayes Theorem, Healthcare Disparities, Physicians, ""Practice Patterns, Physicians"", Prostatic Neoplasms",Missing,"availability of data and materials this study was conducted secondary analysis of existing data, which is only available at saskatchewan cancer registry. for further information on accessing data, please contact saskatchewan cancer registry at info@saskcancer.ca.",Method,Yes,No,N/A,N/A,N/A,N/A,N/A,No,No,N/A,Yes,10.21203/rs.3.rs-386975/v1,2021/04/05,http://dx.doi.org/10.21203/rs.3.rs-386975/v1,Research Square
28/10/2020,2020,10.3390/ijms21218033,"Hydrogen Peroxide, Hydroxyl Radical, Reactive Oxygen Species, Singlet Oxygen, Stress, Mechanical, Water",Missing,N/A,Method,Yes,No,N/A,N/A,N/A,N/A,N/A,No,No,N/A,No,N/A,N/A,N/A,N/A
01/04/2020,2020,10.3390/ijerph17072396,"Clinical Competence, Education, Medical, Undergraduate, Education, Nursing, Palliative Care",Missing,N/A,Method,Yes,Yes,Online,https://www.mdpi.com/1660-4601/17/7/2396/s1,N/A,N/A,N/A,No,No,N/A,No,N/A,N/A,N/A,N/A
9/12/2020,2020,10.1186/s12884-020-03474-x,"Maternal Health Services, Tertiary Care Centers",Missing,availability of data and materials all dataset used and/or analysed during the current study are available from the croosponding author on reasonable request.,Method,Yes,No,N/A,N/A,N/A,N/A,DA,Yes,No,N/A,Yes,10.21203/rs.3.rs-64829/v1,2020/09/03,http://dx.doi.org/10.21203/rs.3.rs-64829/v1,Research Square
06/05/2019,2019,10.1002/mgg3.701,"Coloboma, PAX2 Transcription Factor, Phenotype, Renal Insufficiency, Vesico-Ureteral Reflux",Missing,N/A,Method,Yes,No,N/A,"http://www.lovd.nl/3.0/home, https://www.ncbi.nlm.nih.gov/clinvar/, http://www.hgmd.cf.ac.uk/ac/search.php",N/A,N/A,N/A,No,No,N/A,No,N/A,N/A,N/A,N/A
06/04/2021,2021,10.3390/ijerph18073822,"Circumcision, Female",Missing,data availability statement data used in this study are freely available on the dhs website ( https://dhsprogram.com/data/  accessed on 13 february 2021) and is easy to download with permission from the dhs.,Method,Yes,Yes,Online,"www.tostan.org, https://dhsprogram.com/data/",N/A,Demographic and Health Surveys,Fulltext,Yes,No,N/A,No,N/A,N/A,N/A,N/A
01/05/2021,2021,10.3390/genes12050686,"Colorectal Neoplasms, Genetic Heterogeneity, Lung Neoplasms, Polymorphism, Single Nucleotide",Missing,"data availability statement the chs and fhs datasets as well as the hrs genetic data were obtained from dbgap ( https://www.ncbi.nlm.nih.gov/gap , accession numbers: phs000287.v5.p1 (chs), phs000007.v28.p10 (fhs), and phs000428.v1.p1 (hrs)). phenotypic hrs data were obtained from the university of michigan and the centers for medicare and medical services (cms) in 2015–2016 and downloaded from the hrs public website ( http://hrsonline.isr.umich.edu/index.php?p=data ).",Method,Yes,Yes,Online,"http://hrsonline.isr.umich.edu/index.php?p=data, https://www.ncbi.nlm.nih.gov/gap, www.proteinatlas.org, 10.3390/genes12050686/s1, https://www.mdpi.com/article/10.3390/genes12050686/s1",N/A,N/A,Method,Yes,No,N/A,Yes,10.1101/321992,2018/05/15,http://dx.doi.org/10.1101/321992,bioRxiv
21/2/2019,2019,10.1186/s12889-019-6541-7,"Condoms, Health Knowledge, Attitudes, Practice, Motivation, Personality, Sexual Behavior, Social Skills, Transients and Migrants",Missing,availability of data and materials the datasets generated and analysed during the current study are not publicly available due to the funding nature (national natural science foundation of china) but are available from the corresponding author on reasonable request.,Method,Yes,Yes,Online,10.1371/journal.pone.0062787.t001,N/A,N/A,N/A,No,No,N/A,No,N/A,N/A,N/A,N/A
03/07/2020,2020,10.15252/msb.20209524,"Adaptor Proteins, Vesicular Transport, CD4-Positive T-Lymphocytes, Phosphoproteins, Protein Kinases, Proteomics, Receptors, Antigen, T-Cell, Signal Transduction",Missing,data availability the mass spectrometry proteomic data have been deposited to the proteomexchange consortium ( http://proteomecentral.proteomexchange.org ) via the pride partner repository with the data set identifiers pxd014225 (cd4 +  t cells stimulated with anti‐cd3/anti‐cd4 antibodies) and pxd016583 (ot‐i cd8 +  t cells stimulated with mhc‐i tetramers loaded with n4 agonist peptide).,Method,Yes,Yes,Online,"https://www.uniprot.org/, www.phosphosite.org/, http://proteomecentral.proteomexchange.org, www.uniprot.org, www.phosphosite.org, www.immgen.org, https://bmm-lab.github.io/LymphoAtlas/","PXD016583, PXD014225","UniProt, ProteomeXchange ,  PRIDE Archive",Method|Fulltext,Yes,No,N/A,No,N/A,N/A,N/A,N/A
25/6/2020,2020,10.1155/2020/3452402,"Contact Tracing, Coronavirus Infections, Models, Theoretical, Pandemics, Patient Isolation, Pneumonia, Viral",Missing,data availability the authors confirm that the data supporting the findings of this study are available within the article.,N/A,No,No,N/A,N/A,N/A,N/A,N/A,No,No,N/A,No,N/A,N/A,N/A,N/A
7/2019,2019,10.3201/eid2507.181794,"Asymptomatic Diseases, Dengue Virus",Missing,N/A,Method,Yes,No,N/A,N/A,N/A,N/A,Method|Fulltext,Yes,No,N/A,No,N/A,N/A,N/A,N/A
23/5/2019,2019,10.3390/ijerph16101825,"Behavior, Addictive, Electronic Nicotine Delivery Systems, Non-Smokers, Smokers, Vaping",Missing,N/A,Method,Yes,Yes,Online,https://www.mdpi.com/1660-4601/16/10/1825/s1,N/A,N/A,Method|Fulltext,Yes,No,N/A,No,N/A,N/A,N/A,N/A
25/11/2021,2021,10.3390/ijms222312738,"Benzamides, Neoplasms, Protein Kinases, Purines",Missing,data availability statement not applicable.,Method,Yes,Yes,Online,"10.3390/ijms222312738/s1, https://www.mdpi.com/article/10.3390/ijms222312738/s1",N/A,N/A,Method|Fulltext,Yes,No,N/A,No,N/A,N/A,N/A,N/A
11/10/2021,2021,10.3390/medicina57101082,"COVID-19, Pandemics",Missing,2.2. data collection online social media facebook and twitter were employed for sampling. the survey was posted in the form of a link to be filled in directly by a person willing to participate. the questionnaire was placed in professional social media groups (in which members are subject to prior verification confirming the dental license) and only to groups which allow posting content of this type.|data availability statement the data presented in this study are available on request from the corresponding author. the data are not publicly available due to ethical restrictions.,Method,Yes,No,N/A,N/A,N/A,N/A,N/A,No,No,N/A,No,N/A,N/A,N/A,N/A
11/11/2020,2020,10.1186/s13071-020-04440-4,"Aedes, La Crosse virus, Mosquito Vectors, Phylogeny",Missing,availability of data and materials all data generated or analyzed during this study are included in this published article and its additional files.,Method,Yes,Yes,Online,N/A,N/A,N/A,N/A,No,No,N/A,Yes,10.21203/rs.3.rs-61059/v3,2020/11/04,http://dx.doi.org/10.21203/rs.3.rs-61059/v3,Research Square
4/4/2019,2019,10.1155/2019/2518763,"Farmers, Occupational Exposure, Pesticides, Vegetables",Missing,data availability all relevant data are contained within the paper. additional information can be obtained by contacting dr. jiangping li ( jpingl1273@163.com ).,Method,Yes,No,N/A,N/A,N/A,N/A,N/A,No,No,N/A,No,N/A,N/A,N/A,N/A
10/2/2020,2020,10.1186/s12888-020-2472-1,"Adjustment Disorders, Affect, Anxiety Disorders, Depressive Disorder, Language, Psychometrics",Missing,availability of data and materials the data underlying this study have been uploaded to zenodo and are accessible using the following doi: 10.5281/zenodo.1477084,Method,Yes,Yes,Online,10.5281/zenodo.1477084,N/A,Zenodo,Method|Fulltext,Yes,No,N/A,Yes,10.2196/preprints.21335,2021/02/01,http://dx.doi.org/10.2196/preprints.21335,Journal of Medical Internet Research
10/10/2020,2020,10.3390/molecules25204610,"Curcumin, Epidermal Growth Factor, Nanostructures",Missing,N/A,Method,Yes,No,N/A,N/A,N/A,N/A,N/A,No,No,N/A,No,N/A,N/A,N/A,N/A
21/6/2021,2021,10.1038/s41436-021-01227-5,"Cell-Free Nucleic Acids, Chromosome Disorders, Noninvasive Prenatal Testing",Missing,data availability data that support the findings of this study are available upon request.,Method,Yes,Yes,Online,N/A,N/A,N/A,N/A,No,No,N/A,No,N/A,N/A,N/A,N/A
27/10/2021,2021,10.1038/s41598-021-00721-9,"Feedback, Sensory, Functional Laterality, Hand, Psychomotor Performance",Missing,data availability all data generated or analysed during this study are included in this published article.,Method,Yes,No,N/A,N/A,N/A,N/A,Method,Yes,No,N/A,Yes,10.21203/rs.3.rs-677666/v1,2021/07/12,http://dx.doi.org/10.21203/rs.3.rs-677666/v1,Research Square
10/1/2022,2022,10.7554/eLife.69906,"Adenosine, Atherosclerosis, RNA Stability, RNA, Messenger",China,data availability rna-seq and merip-seq data generated in this study have been deposited to the genome sequence archive in big data center under accession number prjca004746. the following dataset was generated:     liang d   2022 rna n6-methyladenosine modulates endothelial atherogenic responses to disturbed flow genome sequence archive prjca004746,Method,Yes,Yes,N/A,N/A,N/A,N/A,Method|Fulltext,Yes,No,N/A,No,N/A,N/A,N/A,N/A
5/10/2021,2021,10.1038/s41598-021-99272-2,"Bacteria, Drug Resistance, Bacterial",Missing,data availability the data that support the findings of this study are available from the corresponding author on upon reasonable request.,Method,Yes,No,N/A,N/A,N/A,N/A,N/A,No,No,N/A,No,N/A,N/A,N/A,N/A
17/12/2020,2020,10.1186/s12978-020-00990-z,"Maternal Death, Maternal Health, Pregnancy Outcome, Sustainable Development",Missing,"availability of data and materials the datasets generated and analysed during the current study are not yet publicly available due to ongoing data analyses, but they will be available in the nichd data and specimen hub. requests for data prior to the public release will be handled by the authors.",Method,Yes,Yes,Online,https://reproductive-health-journal.biomedcentral.com/articles/supplements/volume-17-supplement-3,N/A,N/A,Method,Yes,No,N/A,No,N/A,N/A,N/A,N/A
21/8/2021,2021,10.1186/s12977-021-00568-y,"Antibodies, Monoclonal, Antibodies, Neutralizing, HIV Antibodies, HIV Envelope Protein gp120, HIV Infections",Missing,availability of data and materials not applicable.,Method,Yes,Yes,Online,N/A,N/A,N/A,N/A,No,No,N/A,No,N/A,N/A,N/A,N/A
29/5/2020,2020,10.1038/s41467-020-16354-x,"CpG Islands, DNA Demethylation, DNA Methylation, Mouse Embryonic Stem Cells",Missing,source data   source data|data availability raw and processed sequencing data has been deposited in the gene expression omnibus (geo) database under the accession number gse129470. all publicly available data sets used are referenced in the relevant methods section. all other relevant data supporting the key findings of this study are available within the article and its supplementary information files or from the corresponding author upon reasonable request. the source data underlying fig.  3b  and supplementary fig.  1e–h  are provided as a source data file. a reporting summary for this article is available as a supplementary information file.|code availability data analysis and graphical representation was performed using custom r scripts and publicly available packages as denoted in the text. all scripts are available upon request.,Method,Yes,Yes,Online,N/A,GSE129470,Gene Expression Omnibus,DA|Method|Fulltext,Yes,Yes,Online,No,N/A,N/A,N/A,N/A
26/8/2020,2020,10.1016/j.molmet.2020.101067,"Gastrointestinal Microbiome, Insulin",Missing,"data and code availability the datasets generated during this study are available from the corresponding author on reasonable request.  figure 4 ,  figure 5  present associated raw data. the custom r scripts used for the data analysis are available from the corresponding author on reasonable request.",Method,Yes,No,N/A,N/A,N/A,N/A,DA|Method|Fulltext,Yes,Yes,N/A,Yes,10.1101/2020.05.08.083923,2020/05/12,http://dx.doi.org/10.1101/2020.05.08.083923,bioRxiv
28/1/2021,2021,10.1155/2021/6647753,"Acute Lung Injury, Neutrophils, Receptors, IgG, Selectins, Sepsis, Uteroglobin",Missing,data availability data are available upon a reasonable request to the corresponding author br.,Method,Yes,No,N/A,N/A,N/A,N/A,N/A,No,No,N/A,No,N/A,N/A,N/A,N/A
13/5/2020,2020,10.1186/s12876-020-01297-w,"Amoxicillin-Potassium Clavulanate Combination, Anti-Bacterial Agents, Ciprofloxacin, Probiotics",Missing,availability of data and materials the raw data used to produce the results presented in this manuscript is available as a supplementary file ( s2  data).,Method,Yes,Yes,Online,N/A,N/A,N/A,N/A,No,No,N/A,No,N/A,N/A,N/A,N/A
12/1/2021,2021,10.1038/s41598-020-80852-7,None,Missing,data availability data and materials reviewed in the study are available.,Method,Yes,No,N/A,N/A,N/A,N/A,Method|Fulltext,Yes,No,N/A,No,N/A,N/A,N/A,N/A
26/4/2022,2022,10.3390/ijerph19095243,"Fertilizers, Nitrogen",Missing,data availability statement the associated dataset of the study is available upon request to the corresponding author.,Method,Yes,Yes,Online,"https://www.mdpi.com/article/10.3390/ijerph19095243/s1, 10.3390/ijerph19095243/s1",N/A,N/A,N/A,No,No,N/A,No,N/A,N/A,N/A,N/A
17/11/2021,2021,10.3390/medicina57111261,"Airway Obstruction, Asthma, Emphysema, Pulmonary Disease, Chronic Obstructive",Missing,data availability statement the data will not be shared according to the regulations of chang gung memorial hospital irb for patient confidentiality.,Method,Yes,Yes,Online,"https://www.mdpi.com/article/10.3390/medicina57111261/s1, 10.3390/medicina57111261/s1",N/A,N/A,Method|Fulltext,Yes,No,N/A,N/A,N/A,N/A,N/A,N/A
10/8/2019,2019,10.1002/cam4.2124,"Neoplasm Recurrence, Local, Neoplasms, Second Primary, Time-to-Treatment",Missing,N/A,Method,Yes,No,N/A,N/A,N/A,N/A,N/A,No,No,N/A,No,N/A,N/A,N/A,N/A
11/11/2019,2019,10.1038/s41398-019-0632-1,"Actigraphy, Bipolar Disorder, Circadian Rhythm, Sleep, Sleep Wake Disorders, Sleepiness",Missing,N/A,Method,Yes,No,N/A,N/A,N/A,N/A,Method,Yes,No,N/A,No,N/A,N/A,N/A,N/A
27/12/2019,2019,10.1186/s12888-019-2401-3,"Anxiety, Depression, Postpartum, Educational Status, Mothers",Missing,"availability of data and materials the data used to derive our conclusions are unsuitable for public deposition because of ethical restrictions and the specific legal framework in japan. furthermore, the ethical guidelines for epidemiological research enforced by the japanese ministry of education, culture, sports, science, and technology and the ministry of health, labour, and welfare restrict the open sharing of epidemiological data. all inquiries about access to data should be sent to: jecs-en@nies.go.jp. the person responsible for handling enquiries sent to this e-mail address is dr. shoji f. nakayama, jecs programme office, national institute for environmental studies.",Method,Yes,Yes,Online,N/A,N/A,N/A,Method,Yes,Yes,Online,No,N/A,N/A,N/A,N/A
23/10/2020,2020,10.3390/ijerph17217774,"Construction Materials, Rain, Water Movements",Missing,N/A,Method,Yes,No,N/A,N/A,N/A,N/A,N/A,No,No,N/A,No,N/A,N/A,N/A,N/A
30/5/2021,2021,10.3390/genes12060844,"Drug Resistance, Neoplasm, Genomics, Precision Medicine, Software",Missing,"data availability statement functional genomics data in this manuscript can be found in: gene expression of breast cancer cell lines are from cancer cell line encyclopedia (ccle) ( http://www.broadinstitute.org/ccle ); large scale of drug screening in cancer cells is from the cancer therapeutics response portal (ctrp,  https://portals.broadinstitute.org/ctrp ). curated data used in method comparison can be found in the github link provided by the paper by chen and zhang [ 11 ]. users can access kesvr model for free at  https://github.com/abhishekmaj08/kesvr.git .",Method,Yes,Yes,Online,"http://portals.broadinstitute.org/ctrp/, https://www.mdpi.com/article/10.3390/genes12060844/s1, https://github.com/abhishekmaj08/kesvr.git, https://portals.broadinstitute.org/ctrp, 10.3390/genes12060844/s1, http://www.broadinstitute.org/ccle",N/A,"Github, portals.broadinstitute.org",Method,Yes,No,N/A,No,N/A,N/A,N/A,N/A
12/2/2021,2021,10.1186/s12886-021-01849-y,"Blepharoplasty, Blepharoptosis",Missing,availability of data and materials the datasets used and/or analysed during the current study are available from the corresponding author on reasonable request.,Method,Yes,Yes,Online,N/A,N/A,N/A,Method|Fulltext,Yes,No,N/A,Yes,10.21203/rs.3.rs-121908/v1,2020/12/10,http://dx.doi.org/10.21203/rs.3.rs-121908/v1,Research Square
9/4/2019,2019,10.1007/s10157-019-01730-9,Patient Admission,Missing,N/A,Method,Yes,Yes,Online,N/A,N/A,N/A,Method|Fulltext,Yes,No,N/A,No,N/A,N/A,N/A,N/A
15/8/2019,2019,10.5888/pcd16.180395,"Accountable Care Organizations, Colorectal Neoplasms, Early Detection of Cancer, Intersectoral Collaboration, Primary Health Care",Missing,N/A,Method,Yes,Yes,Online,"www.communityguide.org, www.thecommunityguide.org",N/A,N/A,N/A,No,No,N/A,No,N/A,N/A,N/A,N/A
9/1/2019,2019,10.1186/s12889-018-6369-6,"Social Isolation, Social Media, Social Networking",Missing,"availability of data and materials the data used in this study are third-party data. the anonymized data sets of the deas (1996, 2002, 2008, 2011, and 2014) are available for secondary analysis. the data has been made available to scientists at universities and research institutes exclusively for scientific purposes. the use of data is subject to written data protection agreements. microdata of the german ageing survey (deas) is available free of charge to scientific researchers for non-profitable purposes. the fdz-dza provides access and support to scholars interested in using deas for their research. however, for reasons of data protection, signing a data distribution contract is required before data can be obtained. please see for further information (data distribution contract):  https://www.dza.de/en/fdz/access-to-data/formular-deas-en-english.html",Method,Yes,Yes,Online,https://www.dza.de/en/fdz/access-to-data/formular-deas-en-english.html,N/A,N/A,N/A,No,No,N/A,No,N/A,N/A,N/A,N/A
24/10/2021,2021,10.1186/s12938-021-00946-9,"Body Dysmorphic Disorders, Prepulse Inhibition",Missing,availability of data and materials the datasets and code scripts used and/or analyzed during the presented study are available from the corresponding author on reasonable request.,Method,Yes,No,N/A,N/A,N/A,N/A,DA|Method,Yes,No,N/A,Yes,10.20944/preprints202201.0053.v1,2022/01/11,http://dx.doi.org/10.20944/preprints202201.0053.v1,Preprints.org
20/4/2020,2020,10.1038/s41398-020-0787-9,"Depressive Disorder, Major",Missing,N/A,Method,Yes,No,N/A,N/A,N/A,N/A,Method,Yes,No,N/A,Yes,10.1101/755447,2019/09/05,http://dx.doi.org/10.1101/755447,bioRxiv
26/6/2019,2019,10.1186/s13045-019-0750-5,"Multiple Myeloma, Plasma Cells",Missing,availability of data and materials the dataset supporting the conclusions of this article is available in the arrayexpress repository under accession number e-mtab-2299.,Method,Yes,Yes,Online,N/A,N/A,N/A,Method,Yes,No,N/A,No,N/A,N/A,N/A,N/A
29/7/2021,2021,10.1007/s10439-021-02829-5,"Atherosclerosis, Coronary Vessels, Models, Cardiovascular",Missing,N/A,Method,Yes,No,N/A,N/A,N/A,N/A,N/A,No,No,N/A,No,N/A,N/A,N/A,N/A
8/9/2020,2020,10.1080/19490976.2020.1814107,"Aging, Cognition, Fecal Microbiota Transplantation, Gastrointestinal Microbiome",Missing,N/A,Method,Yes,No,N/A,N/A,N/A,N/A,Method,Yes,No,N/A,No,N/A,N/A,N/A,N/A
20/7/2020,2020,10.3390/ijerph17145240,"Frail Elderly, Frailty, Psychological Distress, Sleep",Missing,N/A,Method,Yes,Yes,Online,https://www.mdpi.com/1660-4601/17/14/5240/s1,N/A,mdpi.com,Method|Fulltext,Yes,No,N/A,No,N/A,N/A,N/A,N/A
09/09/2020,2020,10.4269/ajtmh.20-0538,"Coronavirus Infections, Lung, Pneumonia, Viral, Ultrasonography",Missing,N/A,N/A,No,No,N/A,N/A,N/A,N/A,N/A,No,No,N/A,No,N/A,N/A,N/A,N/A
24/9/2021,2021,10.3390/ijms221910299,"Chemoreceptor Cells, Hemiptera, Oryza, Tenuivirus, Transcriptome",Missing,data availability statement illumina sequencing reads from these transcriptomes were submitted to the ncbi sequence read archive under accession number prjna589749.,Method,Yes,Yes,Online,https://www.mdpi.com/1422-0067/22/19/10299/s1,PRJNA589749,NCBI Bioproject,Method|Fulltext,Yes,No,N/A,Yes,10.1101/502831,2018/12/20,http://dx.doi.org/10.1101/502831,bioRxiv
18/5/2021,2021,10.3390/genes12050765,"Disease Resistance, Fusarium, Genes, Plant, Phaseolus",Missing,data availability statement not applicable.,Method,Yes,Yes,Online,"https://phytozome.jgi.doe.gov/pz/portal.html, https://www.mdpi.com/article/10.3390/genes12050765/s1, 10.3390/genes12050765/s1",N/A,N/A,Method,Yes,No,N/A,No,N/A,N/A,N/A,N/A
20/12/2020,2020,10.1186/s40249-020-00763-7,"Biomarkers, T-Lymphocytes",Missing,"availability of data and materials all data generated or analysed during this study are included in this published article and its supplementary information files (additional files  1 ,  2 ).",Method,Yes,Yes,Online,N/A,N/A,N/A,N/A,No,No,N/A,Yes,10.21203/rs.3.rs-23530/v1,2020/04/22,http://dx.doi.org/10.21203/rs.3.rs-23530/v1,Research Square
12/11/2019,2019,10.1186/s13756-019-0625-0,"Attitude of Health Personnel, Cross Infection, Drug Resistance, Microbial, Drug Resistance, Multiple, Health Personnel",Missing,availability of data and materials tools (knowledge and perception questionnaires) are included in this published article and its supplementary information files. the datasets generated and/or analysed during the current study are not publicly available.,Method,Yes,Yes,Online,N/A,N/A,N/A,Method,Yes,No,N/A,No,N/A,N/A,N/A,N/A
01/08/2019,2019,10.3390/ijerph16152748,"Bayes Theorem, Gases, Health Expenditures, Industrial Waste",Missing,"2.2. model construction, variable selection and data sources by collecting the panel data of 30 provinces of china except for tibet, taiwan, hong kong and macao during 2005–2016, this paper estimated the long-term impact of industrial air pollution represented by iwge on hce. to examine the heterogeneity of different regions, 30 provinces were divided into high-, middle-, low-income region based on the per capita income in 2016 and regression model was built (formula 1–4) for bqr analysis.  the regression models constructed were as follows: (1) ln ( h c e w t ) = β 0 + β 1 ln ( i n c o m e t ) + β 2 ln ( i w g e t ) + β 3 ln ( d c l i t ) + β 4 ln ( g f e t ) + β 5 ln ( o d r t ) + β 6 ln ( c d t ) + β 7 ln ( h t t ) + ε i   (2) ln ( h c e h t ) = β 0 + β 1 ln ( i n c o m e t ) + β 2 ln ( i w g e t ) + β 3 ln ( d c l i t ) + β 4 ln ( g f e t ) + β 5 ln ( o d r t ) + β 6 ln ( c d t ) + β 7 ln ( h t t ) + ε i   (3) ln ( h c e m t ) = β 0 + β 1 ln ( i n c o m e t ) + β 2 ln ( i w g e t ) + β 3 ln ( d c l i t ) + β 4 ln ( g f e t ) + β 5 ln ( o d r t ) + β 6 ln ( c d t ) + β 7 ln ( h t t ) + ε i   (4) ln ( h c e l t ) = β 0 + β 1 ln ( i n c o m e t ) + β 2 ln ( i w g e t ) + β 3 ln ( d c l i t ) + β 4 ln ( g f e t ) + β 5 ln ( o d r t ) + β 6 ln ( c d t ) + β 7 ln ( h t t ) + ε i  where  t  refers to the time period, and refers to 2005–2016. formula 1–4 respectively represent the regression model for the whole country, the high-income region, the middle-income region and the low-income region. by referring to a number of previous studies, such as nicholas et al. [ 30 ] and tian et al. [ 31 ], this paper selected hce as the dependent variable, and iwge, income, government financial expenditure and so on as the independent variables. it is worth noting that the density of commercial life insurance and chronic diseases were introduced to be independent variables since they had a positive impact on the hce. more specifically, the dependent variable was per capita individual hce, the independent variable was per capita iwge, and the control variables included were per capita income, chronic diseases, and per capita government financial expenditure, the density of commercial life insurance, the old dependency ratio and health technicians. for convenience, these variables are called hce, iwge, income, gfe, dcli, odr, cd and ht, respectively. the relevant definitions and explanations of variables are shown in  table 1 . the data on per capita individual hce, per capita income, per capita government financial expenditure, and the old dependency ratio were from the national bureau of statistics of china (nbsc). the data of per capita iwge were obtained from the china statistical yearbook on the environment (csye) and the density of commercial life insurance from the yearbook of china’s insurance (yci). this study also obtained the data on chronic diseases and health technicians from the china health and family planning statistical yearbook (chfpsy). there are two things to note: first, it is reasonable to use iwge represented industrial air pollution since iwge is the primary indicator of industrial air pollution listed in csye. as part of iwge, the sulfur dioxide emission and other indicators will be studied deeply in the future. second, data on chronic diseases are directly derived from chfpsy, where the prevalence rates of chronic diseases are a hybrid concept. it is not a specific chronic disease but refers to those who have one chronic disease at least. in addition, the prevalence rates of chronic diseases were based on 2013 data due to the prevalence rate remaining relatively stable, which were 538.8‰ in 2003, and 539.9‰ in 2013 over the age of 65. the relevant price data were normalized to be in the 2004 constant price. meanwhile, in order to reduce the dimensional effects and normalizing requirements, all the data are transformed into their natural logarithmic values.",Method,Yes,No,N/A,N/A,N/A,N/A,Method,Yes,No,N/A,No,N/A,N/A,N/A,N/A
09/10/2019,2019,10.1111/1475-6773.13211,"Continuity of Patient Care, Family Practice, Hospitalization, Mental Disorders, Patient Acceptance of Health Care",Missing,"data sources linked administrative data on family practice and hospital utilization by people with smi in england, 2007‐2014.|data collection/extraction methods individual‐level family practice administrative data linked to hospital administrative data.",Method,Yes,No,N/A,N/A,N/A,N/A,N/A,No,No,N/A,No,N/A,N/A,N/A,N/A
15/4/2019,2019,10.1186/s12872-019-1064-9,"Action Potentials, Arrhythmias, Cardiac, Bundle-Branch Block, Coronary Sinus, Electrocardiography, Heart Ventricles",Missing,availability of data and materials the datasets used and analysed during the current study are available from the corresponding author on reasonable request.,Method,Yes,Yes,Online,N/A,N/A,N/A,N/A,No,No,N/A,No,N/A,N/A,N/A,N/A
15/6/2020,2020,10.1186/s12886-020-01510-0,"Diabetic Retinopathy, Macular Edema, Ranibizumab, Visual Acuity",Missing,availability of data and materials the datasets used and/or analysed during the current study are available from the corresponding author on reasonable request.,Method,Yes,No,N/A,N/A,N/A,N/A,N/A,No,No,N/A,No,N/A,N/A,N/A,N/A
28/1/2020,2020,10.1038/s41467-020-14288-y,"Exome, Genetic Variation, Genome, Human, Genome-Wide Association Study, Phenotype",Missing,"data availability ukb data are available for download ( https://www.ukbiobank.ac.uk/ ). summary statistics for the ukb results are available for download at  https://s3.amazonaws.com/helix-research-public/ukbb_exome_analysis_results/readme.txt , and also browseable with an interactive web tool at  https://ukb.research.helix.com . summary statistics for the hnp results are available upon request without restriction. restrictions apply to the availability of the hnp data, which were used under license for the current study, and thus are not publicly available. the hnp data are available for qualified researchers upon reasonable request to craig.kugler@dri.edu and joe.grzymski@dri.edu and with permission of the institute for health innovation and helix. researchers who would like to obtain the raw data related to this study will be presented with a data user agreement, which requires that the participants will not be re-identified and no data will be shared between researchers or uploaded onto public domains.",Method,Yes,Yes,Supplementary Information|Online,"https://ukb.research.helix.com, www.ukbiobank.ac.uk, https://s3.amazonaws.com/helix-research-public/ukbb_exome_analysis_results/readme.txt, https://www.ukbiobank.ac.uk/, https://ukb.research.helix.com/",N/A,UK Biobank,Method,Yes,No,N/A,Yes,10.1101/692368,2019/07/04,http://dx.doi.org/10.1101/692368,bioRxiv
24/1/2020,2020,10.3390/molecules25030517,"Biological Assay, Carica, Plant Extracts, Plant Leaves, Wound Healing",Missing,N/A,Method,Yes,Yes,Online,https://www.mdpi.com/1420-3049/25/3/517/s1,N/A,N/A,N/A,No,No,N/A,No,N/A,N/A,N/A,N/A
06/02/2021,2021,10.3390/nu13020521,"Dietary Supplements, Secondary Prevention, Vitamin D, Vitamins",Missing,data availability statement the data presented in this study are available on reasonable request from the corresponding author. the data are not publicly available due to privacy restriction.,Method,Yes,Yes,Online,https://www.mdpi.com/2072-6643/13/2/521/s1,N/A,N/A,Method,Yes,No,N/A,No,N/A,N/A,N/A,N/A
10/1/2022,2022,10.1038/s41598-021-02554-y,"Angiography, Diabetes Mellitus, Perfusion Imaging, Retinal Vessels, Tomography, Optical Coherence",Missing,N/A,Method,Yes,No,N/A,N/A,N/A,N/A,N/A,No,No,N/A,No,N/A,N/A,N/A,N/A
19/6/2020,2020,10.3390/ijerph17124405,"Dietary Supplements, Glycocalyx, Microcirculation, Plant Extracts, Pomegranate",Missing,N/A,Method,Yes,No,N/A,N/A,N/A,N/A,Method|Fulltext,Yes,No,N/A,No,N/A,N/A,N/A,N/A
29/1/2019,2019,10.1186/s13052-019-0609-y,Respiratory Sounds,Missing,"data collection   general information: gender, age, dwelling area (urban or countryside), full-term or pre-term (< 37 weeks) delivery, vaginal delivery or c-section, first child or not, days of hospitalization, eczema, and drug allergy. history of respiratory or other major disease, family history of asthma, allergic rhinitis or other allergic diseases. recurrent wheezing or not during the 1-year follow-up.|availability of data and materials the datasets supporting the conclusions of this article are included within the article.",Method,Yes,No,N/A,N/A,N/A,N/A,Method,Yes,No,N/A,No,N/A,N/A,N/A,N/A
6/4/2020,2020,10.1155/2020/2369279,"Carotid Artery Diseases, Interleukin-12",Missing,"data availability we declare that the materials described in the manuscript, including all relevant raw data, will be freely available to any scientist wishing to use them for noncommercial purposes, without breaching participant confidentiality.",Method,Yes,No,N/A,N/A,N/A,N/A,N/A,No,No,N/A,No,N/A,N/A,N/A,N/A
16/8/2021,2021,10.3390/ijms22168813,"Interleukin-17, Keratinocytes",Missing,data availability statement not applicable.,Method,Yes,Yes,Online,"10.3390/ijms22168813/s1, https://www.mdpi.com/article/10.3390/ijms22168813/s1",N/A,N/A,N/A,No,No,N/A,No,N/A,N/A,N/A,N/A
6/7/2020,2020,10.1186/s13018-020-01777-5,"Cost Savings, Diaphyses, External Fixators, Fracture Fixation, Fractures, Comminuted, Tibia, Tibial Fractures",Missing,availability of data and materials the datasets used and/or analyzed during the current study are available from the corresponding author on reasonable request.,Method,Yes,No,N/A,N/A,N/A,N/A,Fulltext,Yes,No,N/A,Yes,10.21203/rs.3.rs-116154/v1,2020/12/01,http://dx.doi.org/10.21203/rs.3.rs-116154/v1,Research Square
20/6/2019,2019,10.1002/cam4.2368,"Gene Regulatory Networks, Microsatellite Instability",Missing,N/A,Method,Yes,No,N/A,N/A,N/A,N/A,Method|Fulltext,Yes,No,N/A,No,N/A,N/A,N/A,N/A
22/6/2020,2020,10.1038/s41598-020-67339-1,"Bacillus thuringiensis Toxins, Endotoxins, Hemolysin Proteins, Zea mays",Missing,N/A,Method,Yes,No,N/A,N/A,N/A,N/A,Method,Yes,No,N/A,No,N/A,N/A,N/A,N/A
3/3/2021,2021,10.1038/s41598-021-84545-7,"Food Chain, Gastrointestinal Contents, Larva, Perciformes, Predatory Behavior",Missing,data availability data and statistical code is avaliable upon request.,Method,Yes,No,N/A,N/A,N/A,N/A,DA|Method,Yes,No,N/A,No,N/A,N/A,N/A,N/A
22/7/2020,2020,10.1038/s41598-020-68806-5,"HIV Infections, HIV-1, HIV-2",Missing,N/A,Method,Yes,Yes,Online,N/A,N/A,N/A,N/A,No,No,N/A,No,N/A,N/A,N/A,N/A
27/10/2021,2021,10.1038/s41598-021-00382-8,"Bone Nails, Lasers",Missing,N/A,Method,Yes,No,N/A,N/A,N/A,N/A,Method|Fulltext,Yes,No,N/A,Yes,10.21203/rs.3.rs-234726/v1,2021/03/17,http://dx.doi.org/10.21203/rs.3.rs-234726/v1,Research Square
8/1/2020,2020,10.1038/s41586-019-1878-8,Developmental Disabilities,Missing,code availability our study follows the guidelines for accurate and transparent health estimate reporting (gather; supplementary table  1 ). all code used for these analyses is publicly available online  http://ghdx.healthdata.org/record/ihme-data/lmic-child-growth-failure-geospatial-estimates-2000-2017  and at  http://github.com/ihmeuw/lbd/tree/cgf-lmic-2019 .,Method,Yes,Yes,Online,"https://vizhub.healthdata.org/lbd/cgf.Even, http://github.com/ihmeuw/lbd/tree/cgf-lmic-2019, http://ghdx.healthdata.org/record/ihme-data/lmic-child-growth-failure-geospatial-estimates-2000-2017, https://vizhub.healthdata.org/lbd/cgf, https://vizhub.healthdata.org/lbd/cgf.The",N/A,"Github, vizhub.healthdata.org",DA,Yes,Yes,Online,No,N/A,N/A,N/A,N/A
21/10/2019,2019,10.3390/ijms20205206,"Viral Envelope Proteins, Zika Virus Infection",Missing,N/A,Method,Yes,Yes,Online,https://www.mdpi.com/1422-0067/20/20/5206/s1,N/A,N/A,Method|Fulltext,Yes,No,N/A,Yes,10.1101/564542,2019/03/01,http://dx.doi.org/10.1101/564542,bioRxiv
30/11/2020,2020,10.1186/s12889-020-09675-5,"Health Status Disparities, Social Determinants of Health, Thinness",Missing,"availability of data and material mics 2014 dataset is publicly available online [ 26 ], public access to the data base is open and no ethical approval is required to access and use this data.",Method,Yes,Yes,Online,N/A,N/A,N/A,Method|Fulltext,Yes,No,N/A,No,N/A,N/A,N/A,N/A
25/11/2019,2019,10.3390/ijerph16234688,"Academic Success, Physical Education and Training, Sports",Missing,N/A,Method,Yes,Yes,Online,https://www.mdpi.com/1660-4601/16/23/4688/s1,N/A,N/A,N/A,No,No,N/A,No,N/A,N/A,N/A,N/A
27/5/2020,2020,10.1001/jamanetworkopen.2020.6636,"Communication, Obstetrics, Physician-Patient Relations",Missing,N/A,Method,Yes,No,N/A,N/A,N/A,N/A,Method,Yes,No,N/A,No,N/A,N/A,N/A,N/A
15/12/2020,2021,10.15252/embj.2019103701,"Gene Regulatory Networks, Hippocampus, Intellectual Disability, Mutation, Schizophrenia",Missing,data availability the datasets produced in this study are available in the following databases: rna‐seq data: gene expression omnibus gse157375 ( https://www.ncbi.nlm.nih.gov/geo/query/acc.cgi?acc=gse157375 ).,Method,Yes,Yes,Online,https://www.ncbi.nlm.nih.gov/geo/query/acc.cgi?acc=gse157375,GSE157375,Gene Expression Omnibus,Method|Fulltext,Yes,No,N/A,No,N/A,N/A,N/A,N/A
15/6/2020,2020,10.1186/s13071-020-04177-0,"Blood, DNA, Forests, Haemosporida, Simuliidae",Missing,availability of data and materials all data supporting the conclusions of this article are included in the article.,Method,Yes,No,N/A,N/A,N/A,N/A,N/A,No,No,N/A,Yes,10.21203/rs.2.22636/v2,2020/05/12,http://dx.doi.org/10.21203/rs.2.22636/v2,Research Square
18/5/2021,2021,10.3390/molecules26103000,"Physical Phenomena, Precision Medicine, Printing, Three-Dimensional, Sorbitol",Missing,data availability statement not applicable.,Method,Yes,No,N/A,N/A,N/A,N/A,N/A,No,No,N/A,No,N/A,N/A,N/A,N/A
15/1/2020,2020,10.1186/s12711-019-0522-2,"Cichlids, Genome, Meat",Missing,availability of data and materials the genotype data used in the study are from commercial family material. this information may be made available to non-competitive interests under conditions specified in a data transfer agreement. requests to access these datasets should be directed to alejandro tola alvarez: alex@genomar.com.,Method,Yes,Yes,Online,N/A,N/A,N/A,Method,Yes,No,N/A,Yes,10.1101/579334,2019/03/19,http://dx.doi.org/10.1101/579334,bioRxiv
20/6/2019,2019,10.1155/2019/8586927,"Cerebral Revascularization, Long Term Adverse Effects, Myocardial Revascularization",Missing,data availability the data used to support the findings of this study are restricted by the university of verona ethical committee in order to protect patient privacy. data are available from prof. flavio ribichini for researchers who meet the criteria for access to confidential data.,Method,Yes,No,N/A,N/A,N/A,N/A,N/A,No,No,N/A,No,N/A,N/A,N/A,N/A
29/11/2019,2019,10.3390/ijerph16234800,"Denitrification, Nitrogen, Waste Disposal, Fluid, Waste Water, Water Pollutants, Chemical, Wetlands",Missing,N/A,Method,Yes,No,N/A,N/A,N/A,N/A,Method,Yes,No,N/A,No,N/A,N/A,N/A,N/A
24/3/2020,2020,10.1038/s41467-020-15321-w,"Arabidopsis Proteins, Bacterial Proteins, Bacteriochlorophylls, Light-Harvesting Protein Complexes, Solar Energy, Synthetic Biology",Missing,"source data   source data|data availability the data underlying figs.  1 a–c,  2 a–c, e,  3 d–g and  4a–f, i  as well as supplementary figs.  2 ,  4 ,  6 – 11 ,  18 – 20  are provided as a source data file. all data and biological materials reported in this study can be provided by the corresponding author upon reasonable request.|code availability codes for data processing, analysis, plotting and simulation were implemented within matlab (release 2018b; mathworks) and can be provided by the corresponding author on reasonable request.",Method,Yes,Yes,Online,N/A,N/A,N/A,DA|Method,Yes,Yes,Online,Yes,10.1101/565283,2019/03/05,http://dx.doi.org/10.1101/565283,bioRxiv
29/12/2020,2020,10.1016/j.xplc.2020.100139,"Acclimatization, Cold Temperature, Genetic Variation, Genotype, Phenotype, Pinus sylvestris",Missing,N/A,Method,Yes,No,N/A,10.13039/501100001862Formas,N/A,N/A,Method|Fulltext,Yes,No,N/A,No,N/A,N/A,N/A,N/A
13/11/2020,2020,10.1038/s41598-020-76844-2,"Goat Diseases, Sheep Diseases, Theileria, Theileriasis",Missing,N/A,Method,Yes,No,N/A,N/A,N/A,N/A,N/A,No,No,N/A,No,N/A,N/A,N/A,N/A
30/4/2020,2021,10.1007/s10803-020-04506-3,"Behavior Observation Techniques, Parenting, Problem Behavior",Missing,N/A,Method,Yes,No,N/A,N/A,N/A,N/A,N/A,No,No,N/A,Yes,10.21203/rs.3.rs-1993442/v1,2022/08/30,http://dx.doi.org/10.21203/rs.3.rs-1993442/v1,Research Square
21/2/2021,2021,10.1038/s41396-021-00897-y,"Metagenome, Soil",Missing,N/A,Method,Yes,Yes,Online,N/A,N/A,N/A,Method|Fulltext,Yes,No,N/A,Yes,10.1101/2020.08.06.237214,2020/08/07,http://dx.doi.org/10.1101/2020.08.06.237214,bioRxiv
31/10/2019,2019,10.3390/ijerph16214229,"Awareness, Fetal Alcohol Spectrum Disorders",Missing,N/A,Method,Yes,No,N/A,N/A,N/A,N/A,N/A,No,No,N/A,No,N/A,N/A,N/A,N/A
1/2019,2019,10.1016/j.jclinepi.2018.08.019,"Data Accuracy, Research Design, Systematic Reviews as Topic",Missing,N/A,Method,Yes,Yes,Online,"https://www.healthevidence.org/our-appraisal-tools.aspx, http://www.equator-network.org/library/reporting-guidelines-under-development/#74",N/A,N/A,N/A,No,No,N/A,No,N/A,N/A,N/A,N/A
13/8/2021,2021,10.1007/s00705-021-05159-y,Host-Pathogen Interactions,Missing,N/A,Method,Yes,No,N/A,N/A,N/A,N/A,N/A,No,No,N/A,No,N/A,N/A,N/A,N/A
[truncated: 2,718,770 more chars]
